# Supplementary material for: Amine protection by in situ formation of choline chloride-based deep eutectic solvents
Source: Royal Society of Chemistry journal article supplement (doi:10.1039/d3gc00118k), 2023-01-01

## Electronic Supplementary Information

### **Amine Protection by *in situ* Formation of choline chloride-based Deep Eutectic**

#### **Solvents**

Monica Nardi,<sup>†\*</sup> Giuseppina De Luca,<sup>††</sup> Paolo Novelli,<sup>†</sup> Manuela Oliverio,<sup>†</sup> Salvatore Romano,<sup>†</sup>  
Antonio Procopio<sup>†</sup>

<sup>†</sup> *Department of Health Sciences, University Magna Græcia of Catanzaro, Campus S. Venuta, Viale Europa, Loc. Germaneto, 88100 Catanzaro (Italy)*

<sup>††</sup> *Department of Chemistry and Chemical Technologies of University of Calabria, Arcavacata di Rende, 87036 Cosenza, Italy*

#### **\*Corresponding Author:**

Professor Monica Nardi

Università “Magna Græcia” di Catanzaro

Dipartimento di Scienze della Salute

Viale Europa, Germaneto - 88100 Catanzaro - Italy

Tel. +39 0961 3694116; Fax. +39 0961 3694237; e-mail: [monica.nardi@unicz.it](mailto:monica.nardi@unicz.it)

|                                                          |       |
|----------------------------------------------------------|-------|
| <b>Electronic Supplementary Information</b>              | p. 1  |
| <b>Table of Contents</b>                                 | p. 2  |
| <b>Figure S1.</b> FT-IR-DES <sub>1</sub>                 | p. 5  |
| <b>Figure S2.</b> FT-IR-DES <sub>2</sub>                 | p. 6  |
| <b>Figure S3.</b> FT-IR-DES <sub>3</sub>                 | p. 7  |
| <b>Figure S4.</b> FT-IR-DES <sub>4</sub>                 | p. 8  |
| <b>Figure S5.</b> FT-IR-DES <sub>5</sub>                 | p. 9  |
| <b>Figure S6.</b> FT-IR-DES <sub>6</sub>                 | p. 10 |
| <b>Figure S7.</b> FT-IR-DES <sub>7</sub>                 | p. 11 |
| <b>Figure S8.</b> FT-IR-DES <sub>8</sub>                 | p. 12 |
| <b>Figure S9.</b> FT-IR-DES <sub>9</sub>                 | p. 13 |
| <b>Figure S10.</b> FT-IR-DES <sub>10</sub>               | p. 14 |
| <b>Figure S11.</b> FT-IR-DES <sub>11</sub>               | p. 15 |
| <b>Figure S12.</b> FT-IR-DES <sub>12</sub>               | p. 16 |
| <b>Figure S13.</b> FT-IR-DES <sub>13</sub>               | p. 17 |
| <b>Figure S14.</b> FT-IR-DES <sub>14</sub>               | p. 18 |
| <b>Figure S15.</b> <sup>1</sup> H-NMR- DES <sub>1</sub>  | p. 19 |
| <b>Figure S16.</b> <sup>13</sup> C-NMR- DES <sub>1</sub> | p. 21 |
| <b>Figure S17.</b> HMQC- DES <sub>1</sub>                | p. 21 |
| <b>Figure S18.</b> COSY- DES <sub>1</sub>                | p. 22 |
| <b>Figure S19.</b> NOESY- DES <sub>1</sub>               | p. 22 |
| <b>Figure S20.</b> <sup>1</sup> H-NMR- DES <sub>2</sub>  | p. 24 |
| <b>Figure S21.</b> <sup>13</sup> C-NMR- DES <sub>2</sub> | p. 25 |
| <b>Figure S22.</b> NOESY- DES <sub>2</sub>               | p. 25 |
| <b>Figure S23.</b> <sup>1</sup> H-NMR- DES <sub>3</sub>  | p. 26 |
| <b>Figure S24.</b> <sup>13</sup> C-NMR- DES <sub>3</sub> | p. 27 |
| <b>Figure S25.</b> NOESY- DES <sub>3</sub>               | p. 28 |
| <b>Figure S26.</b> <sup>1</sup> H-NMR- DES <sub>4</sub>  | p. 29 |
| <b>Figure S27.</b> <sup>13</sup> C-NMR- DES <sub>4</sub> | p. 30 |
| <b>Figure S28.</b> NOESY- DES <sub>4</sub>               | p. 30 |
| <b>Figure S29.</b> <sup>1</sup> H-NMR- DES <sub>5</sub>  | p. 31 |
| <b>Figure S30.</b> <sup>13</sup> C-NMR- DES <sub>5</sub> | p. 32 |
| <b>Figure S31.</b> NOESY- DES <sub>5</sub>               | p. 33 |

|                                                            |       |
|------------------------------------------------------------|-------|
| <b>Figure S32.</b> $^1\text{H}$ -NMR- DES <sub>6</sub>     | p. 35 |
| <b>Figure S33.</b> $^{13}\text{C}$ -NMR- DES <sub>6</sub>  | p. 35 |
| <b>Figure S34.</b> NOESY- DES <sub>6</sub>                 | p. 36 |
| <b>Figure S35.</b> $^1\text{H}$ -NMR- DES <sub>7</sub>     | p. 36 |
| <b>Figure S36.</b> $^{13}\text{C}$ -NMR- DES <sub>7</sub>  | p. 37 |
| <b>Figure S37.</b> NOESY- DES <sub>7</sub>                 | p. 37 |
| <b>Figure S38.</b> $^1\text{H}$ -NMR- DES <sub>8</sub>     | p. 38 |
| <b>Figure S39.</b> $^{13}\text{C}$ -NMR- DES <sub>8</sub>  | p. 39 |
| <b>Figure S40.</b> NOESY- DES <sub>8</sub>                 | p. 40 |
| <b>Figure S41.</b> $^1\text{H}$ -NMR- DES <sub>9</sub>     | p. 42 |
| <b>Figure S42.</b> $^{13}\text{C}$ -NMR- DES <sub>9</sub>  | p. 44 |
| <b>Figure S43.</b> NOESY- DES <sub>9</sub>                 | p. 45 |
| <b>Figure S44.</b> $^1\text{H}$ -NMR- DES <sub>10</sub>    | p. 48 |
| <b>Figure S45.</b> $^{13}\text{C}$ -NMR- DES <sub>10</sub> | p. 48 |
| <b>Figure S46.</b> NOESY- DES <sub>10</sub>                | p. 49 |
| <b>Figure S47.</b> $^1\text{H}$ -NMR- DES <sub>11</sub>    | p. 51 |
| <b>Figure S48.</b> $^{13}\text{C}$ -NMR- DES <sub>11</sub> | p. 51 |
| <b>Figure S49.</b> NOESY- DES <sub>11</sub>                | p. 52 |
| <b>Figure S50.</b> $^1\text{H}$ -NMR- DES <sub>12</sub>    | p. 53 |
| <b>Figure S51.</b> $^{13}\text{C}$ -NMR- DES <sub>12</sub> | p. 54 |
| <b>Figure S52.</b> NOESY- DES <sub>12</sub>                | p. 54 |
| <b>Figure S53.</b> $^1\text{H}$ -NMR- DES <sub>13</sub>    | p. 56 |
| <b>Figure S54.</b> $^{13}\text{C}$ -NMR- DES <sub>13</sub> | p. 57 |
| <b>Figure S55.</b> NOESY- DES <sub>13</sub>                | p. 57 |
| <b>Figure S56.</b> $^1\text{H}$ -NMR- DES <sub>14</sub>    | p. 59 |
| <b>Figure S57.</b> $^{13}\text{C}$ -NMR- DES <sub>14</sub> | p. 59 |
| <b>Figure S58.</b> NOESY- DES <sub>14</sub>                | p. 60 |
| <b>Characterization data for products 1a-12d</b>           | p. 62 |
| <b>References</b>                                          |       |
| <b>Figure S59.</b> $^1\text{H}$ -NMR- 1a                   | p. 66 |
| <b>Figure S60.</b> $^{13}\text{C}$ -NMR- 1a                | p. 66 |
| <b>Figure S61.</b> MSEI (+)- 1a                            | p. 67 |

**Figure S74.**  $^1\text{H}$ -NMR- 7a

p. 68

**Figure S75.**  $^{13}\text{C}$ -NMR- 7a

p. 68

**Figure S76.** MSEI (+)- 7a

p. 69

**Figure S1.** FT-IR-DES<sub>1</sub>

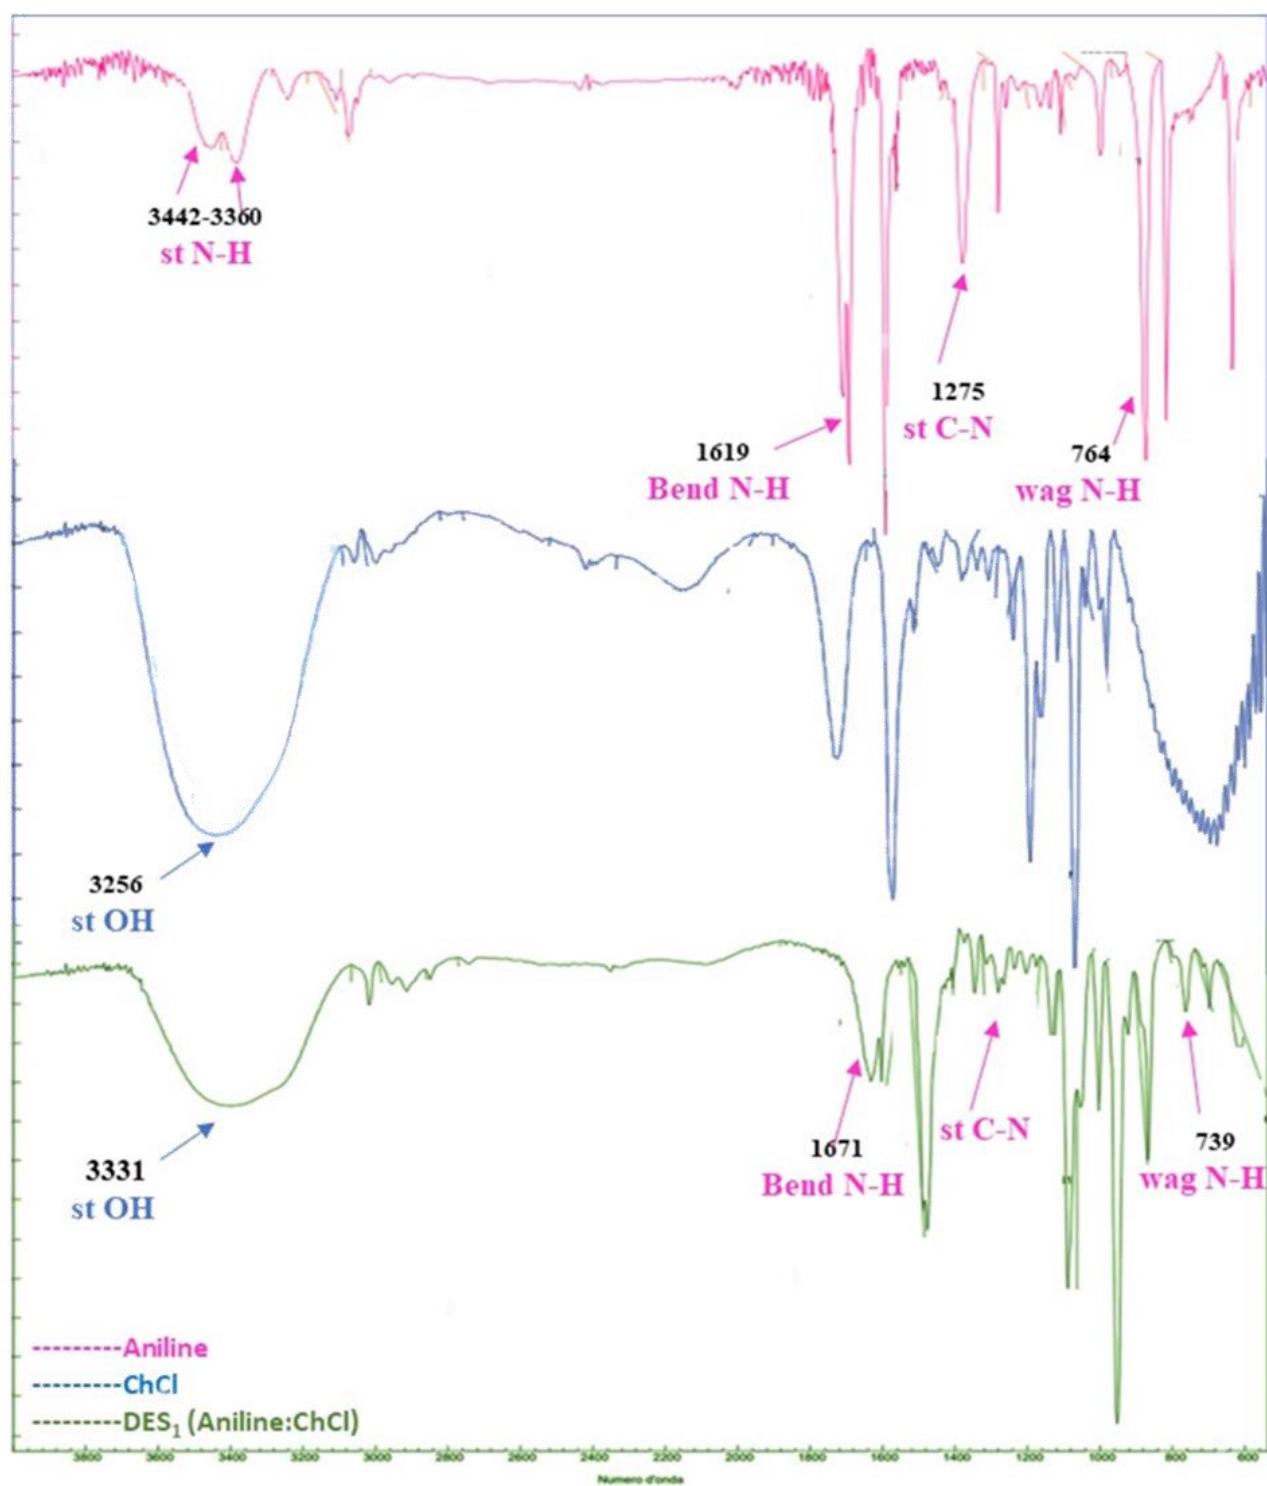

**Figure S2.** FT-IR-DES<sub>2</sub>

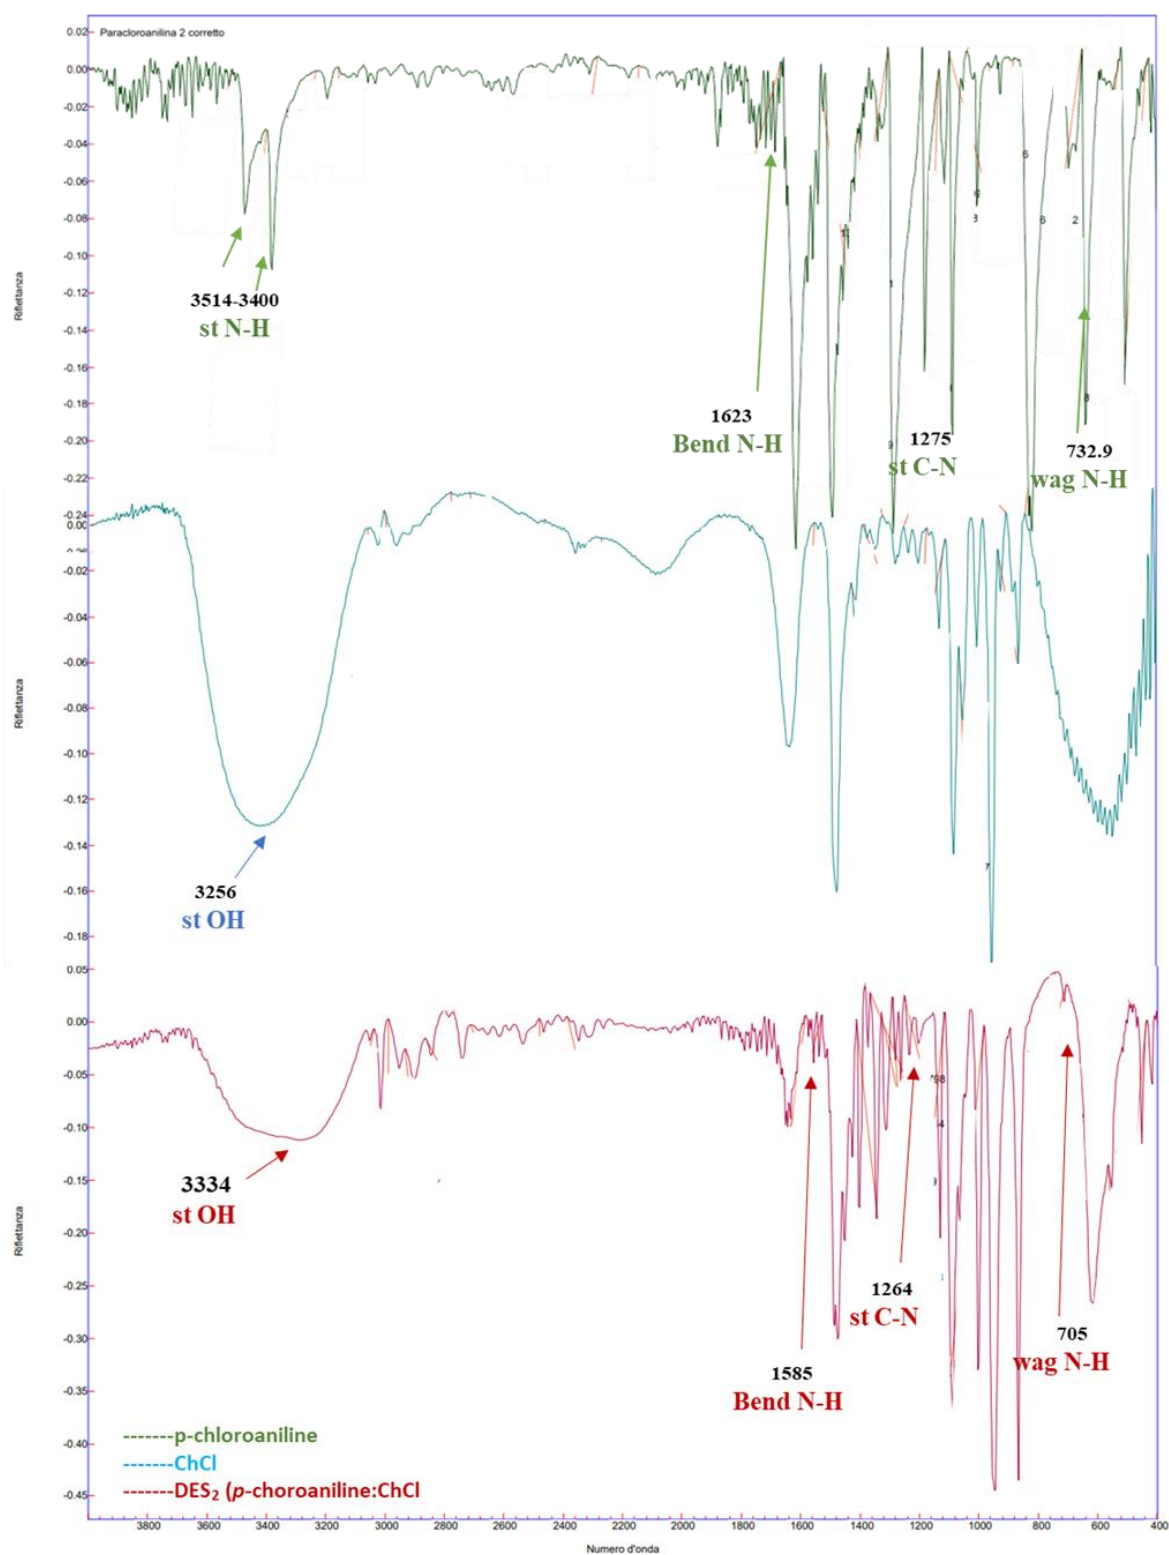

**Figure S3.** FT-IR-DES<sub>3</sub>

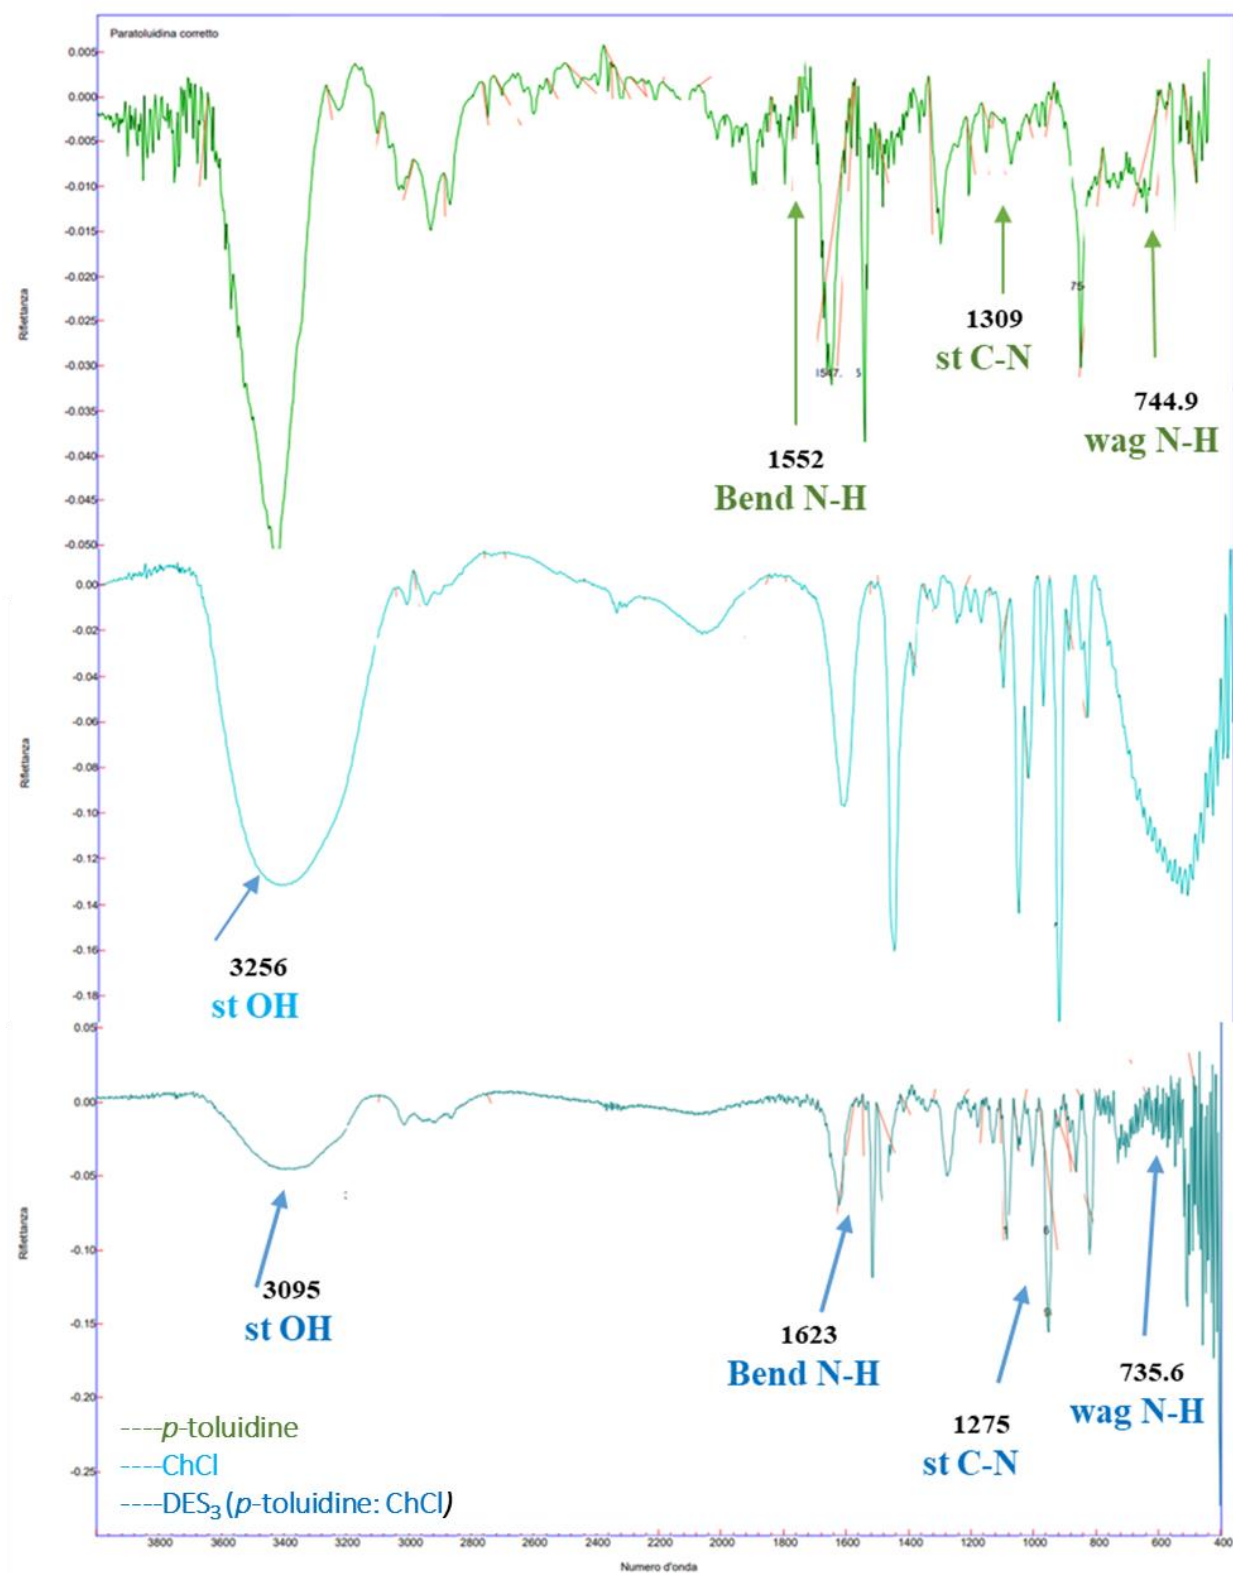

**Figure S4.** FT-IR-DES<sub>4</sub>

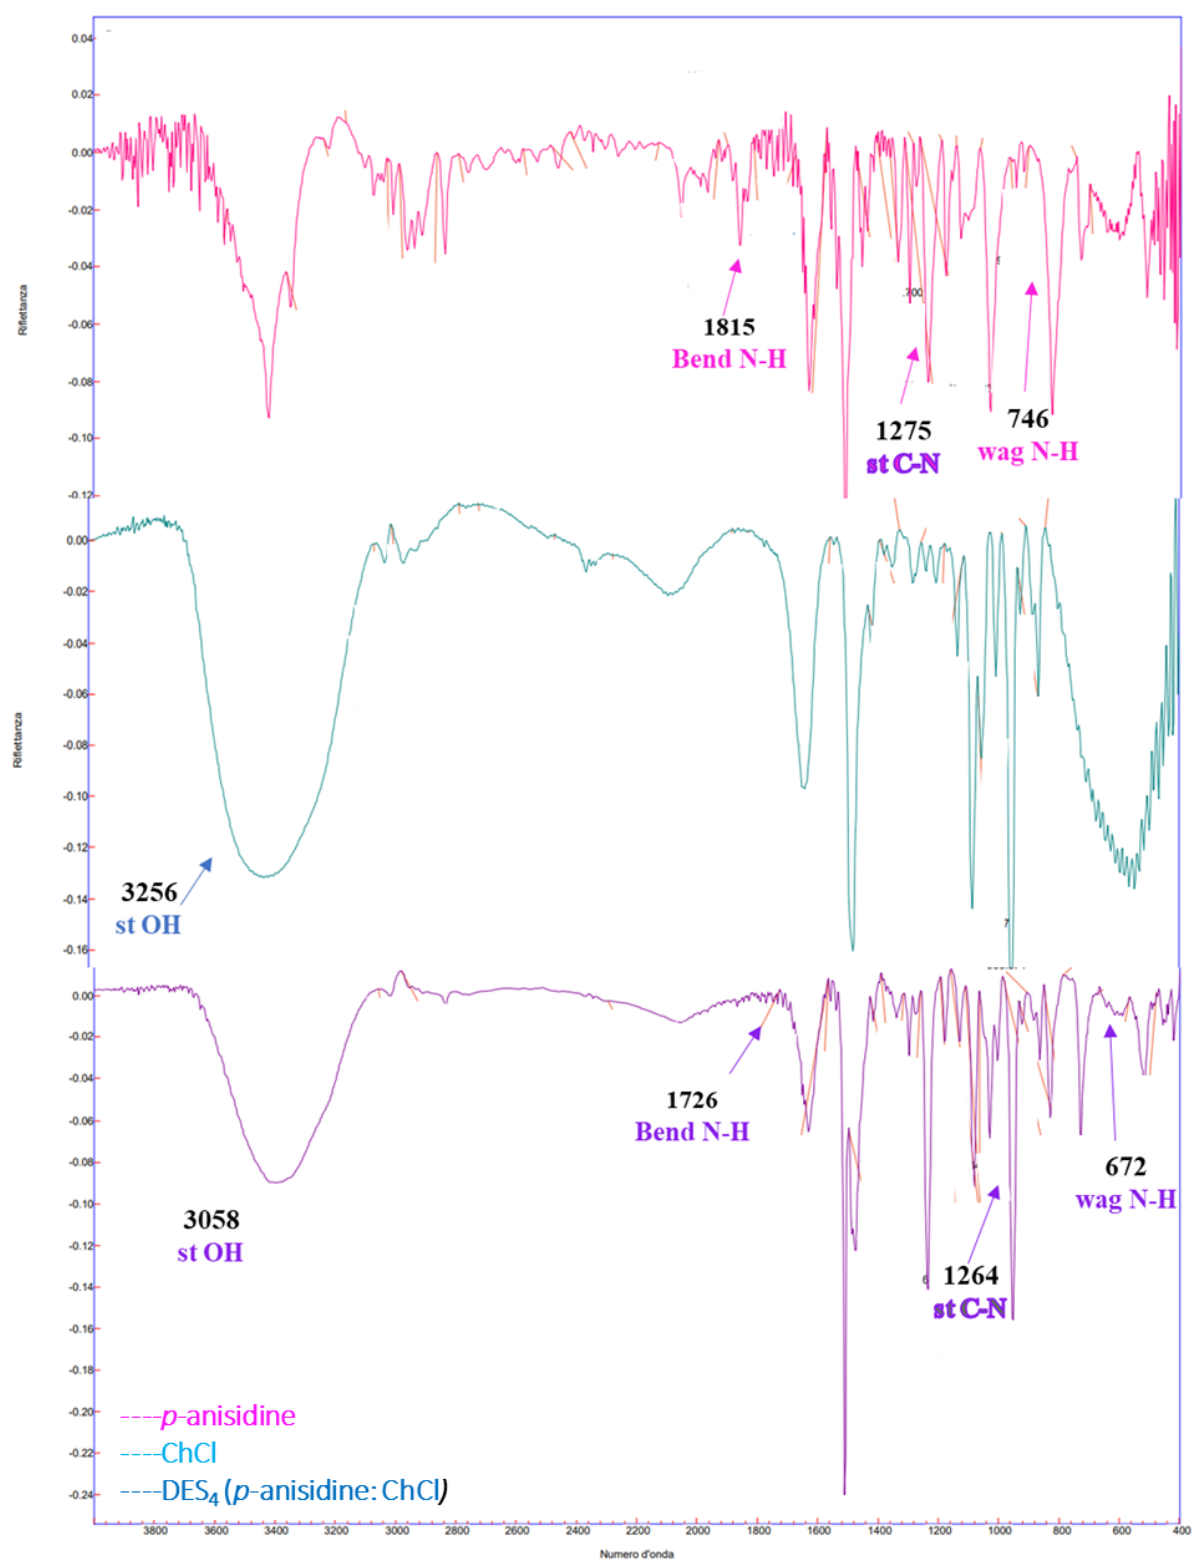



**Figure S5.** FT-IR- DES<sub>5</sub>

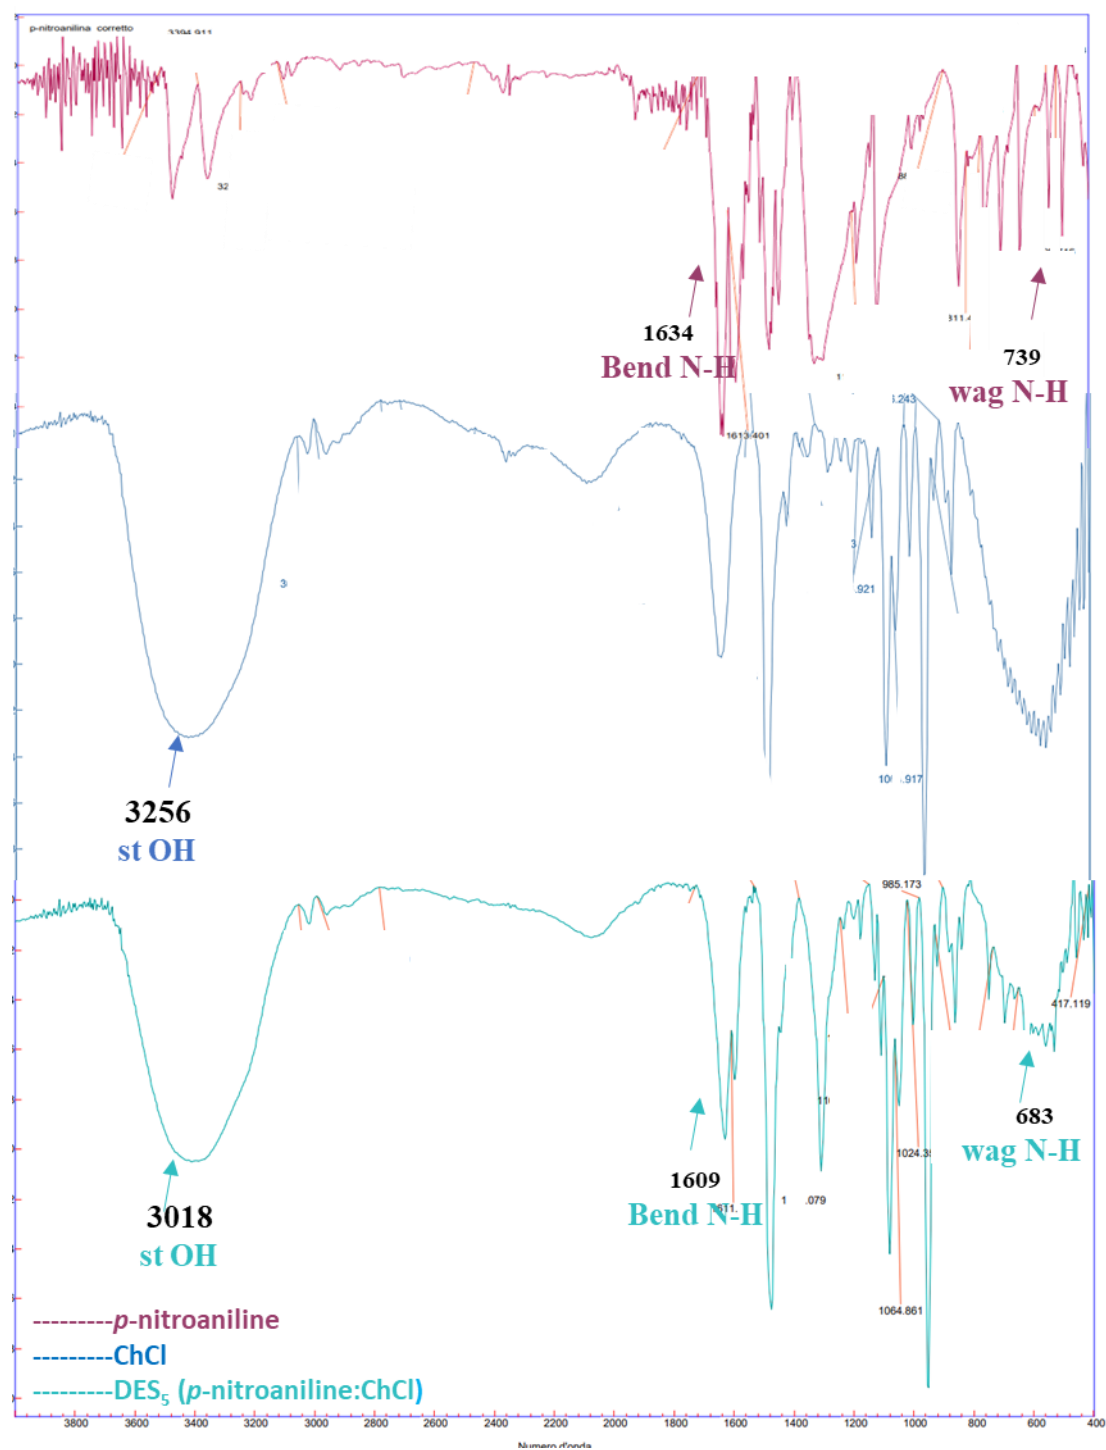

**Figure S6.** FT-IR-DES<sub>6</sub>

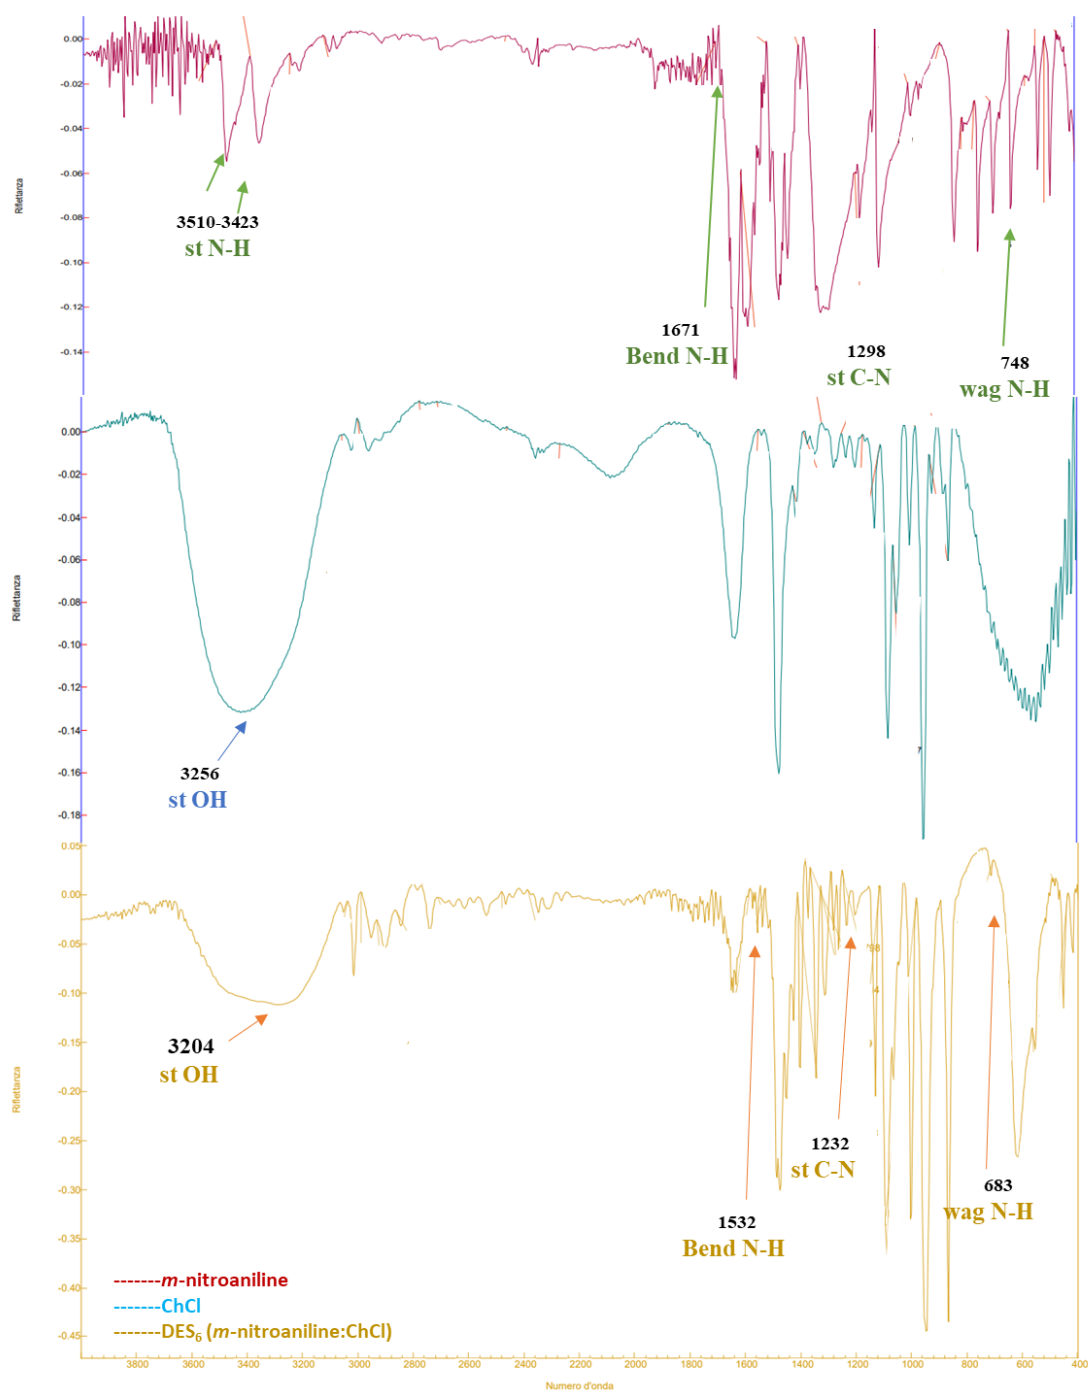

**Figure S7.** FT-IR-DES<sub>7</sub>

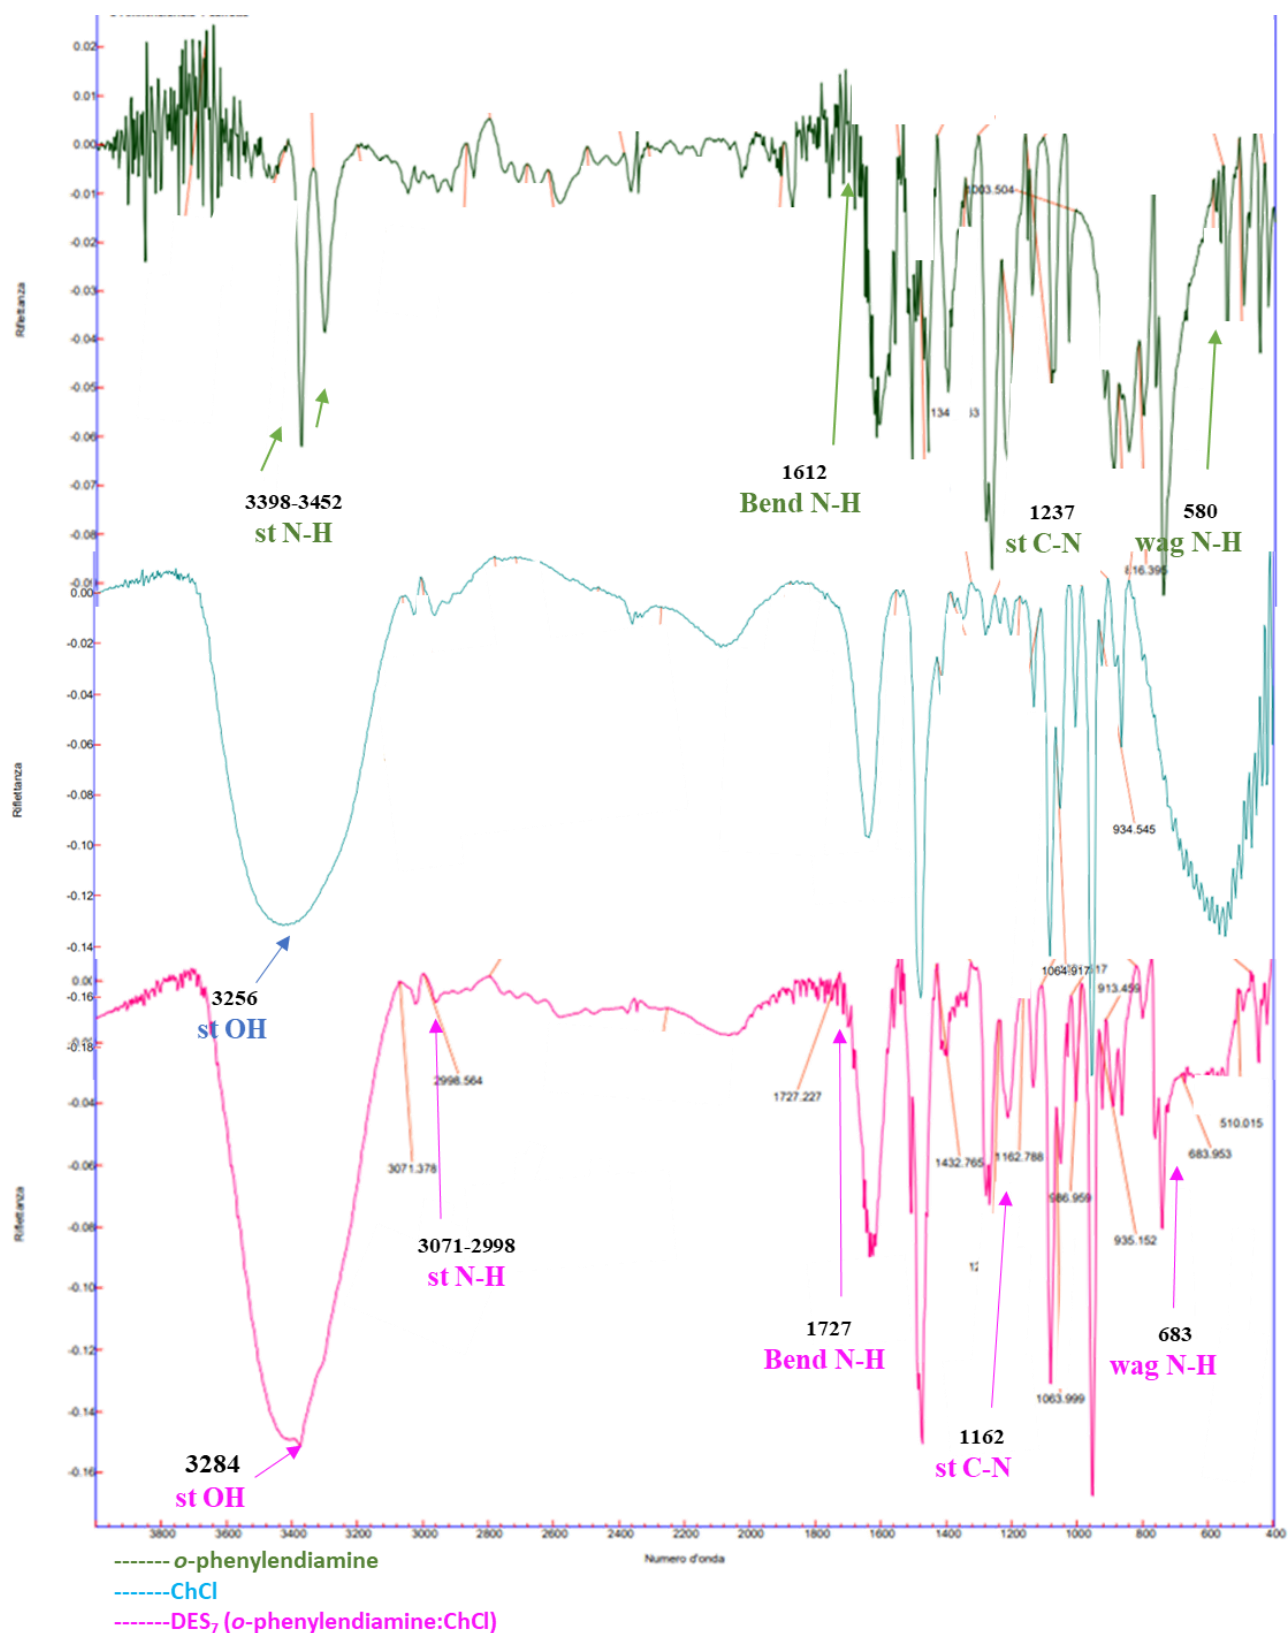

**Figure S8.** FT-IR-DES<sub>8</sub>

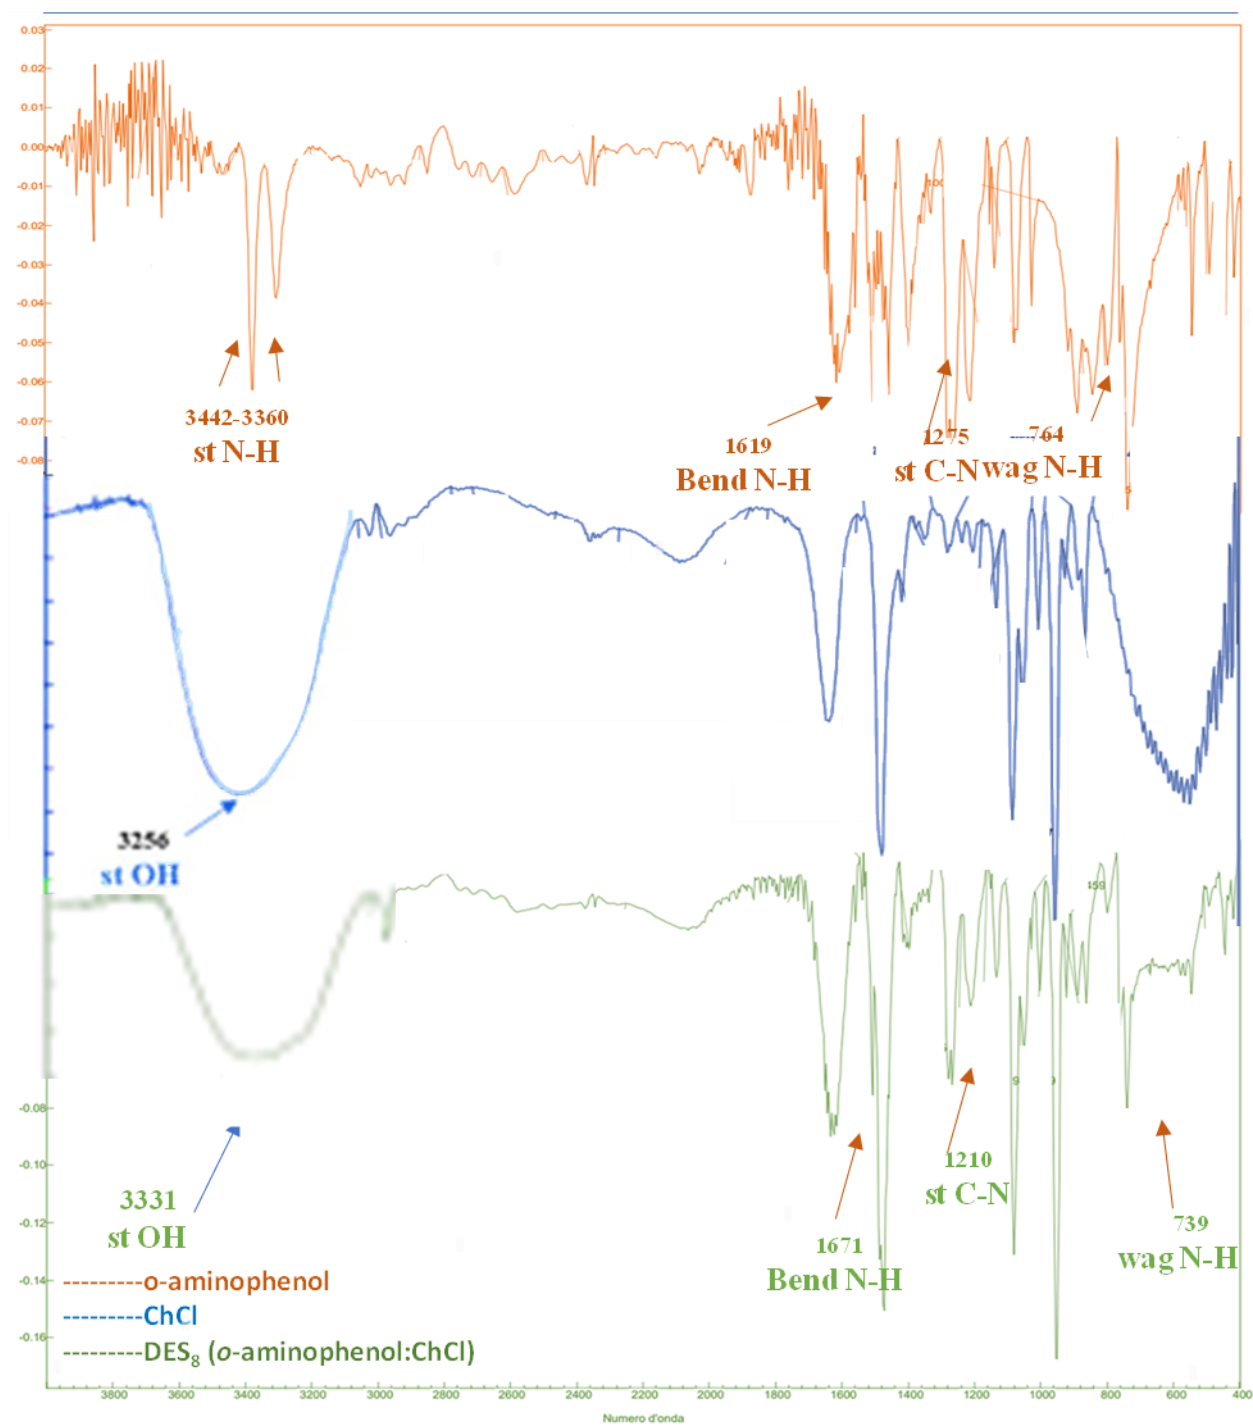

**Figure S9.** FT-IR-DES<sub>9</sub>

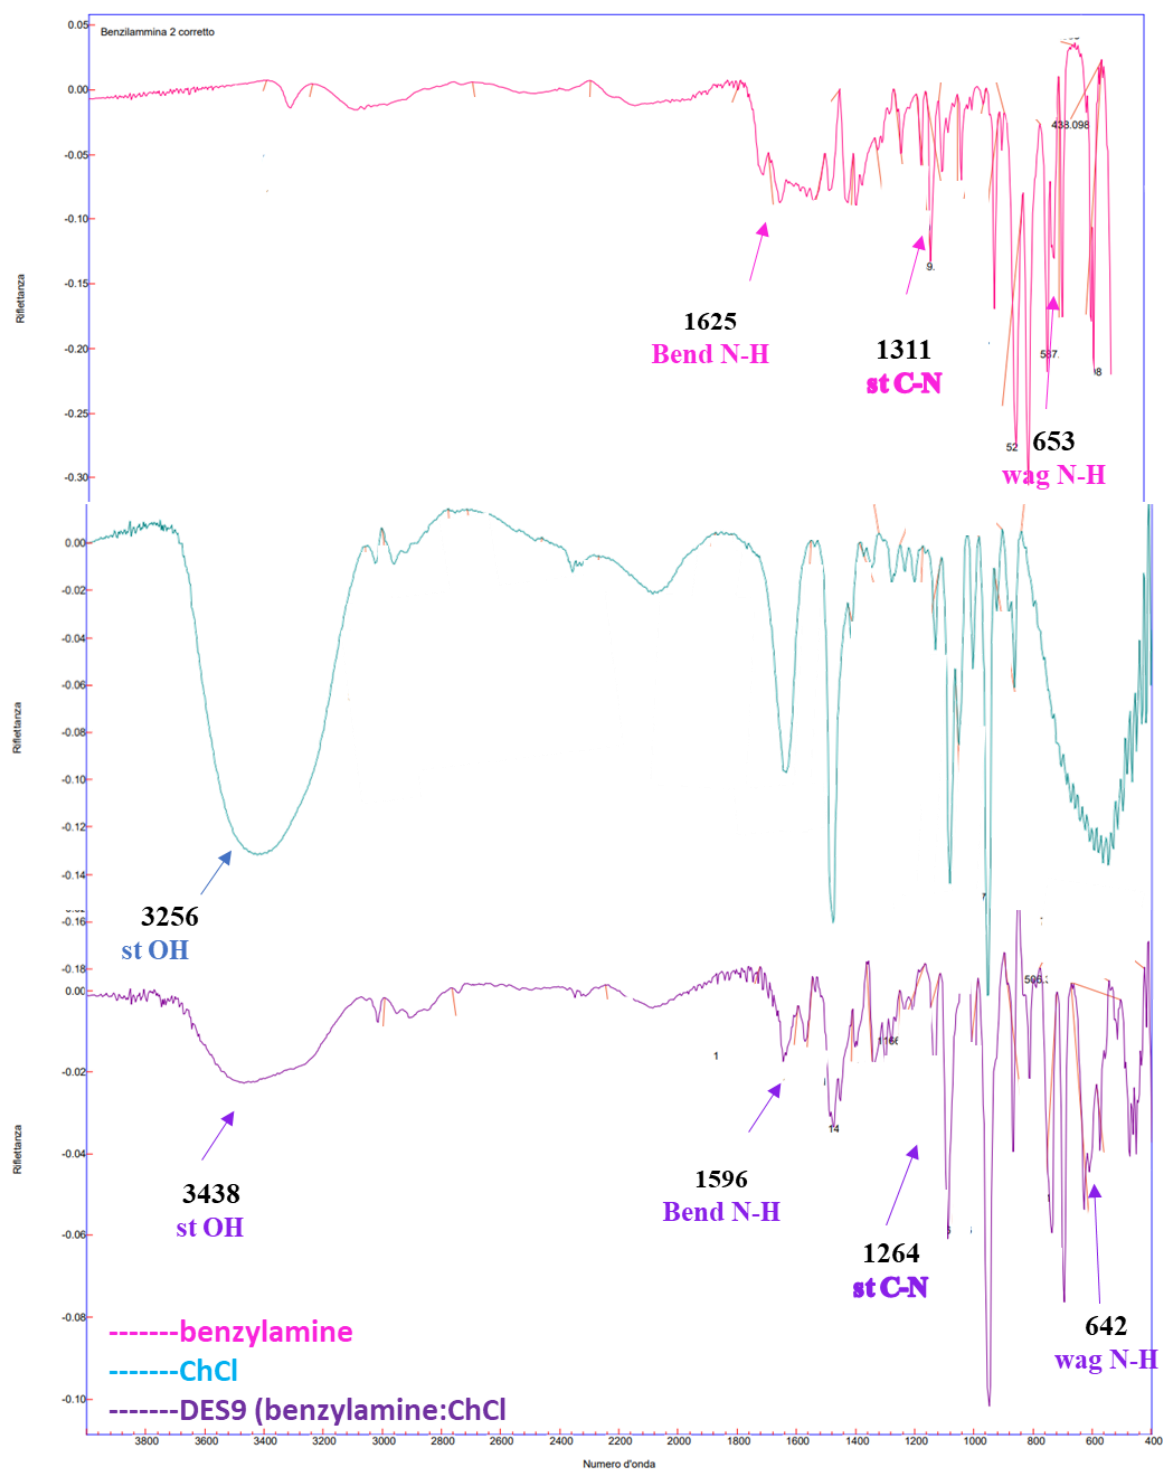

**Figure S10.** FT-IR-DES<sub>10</sub>

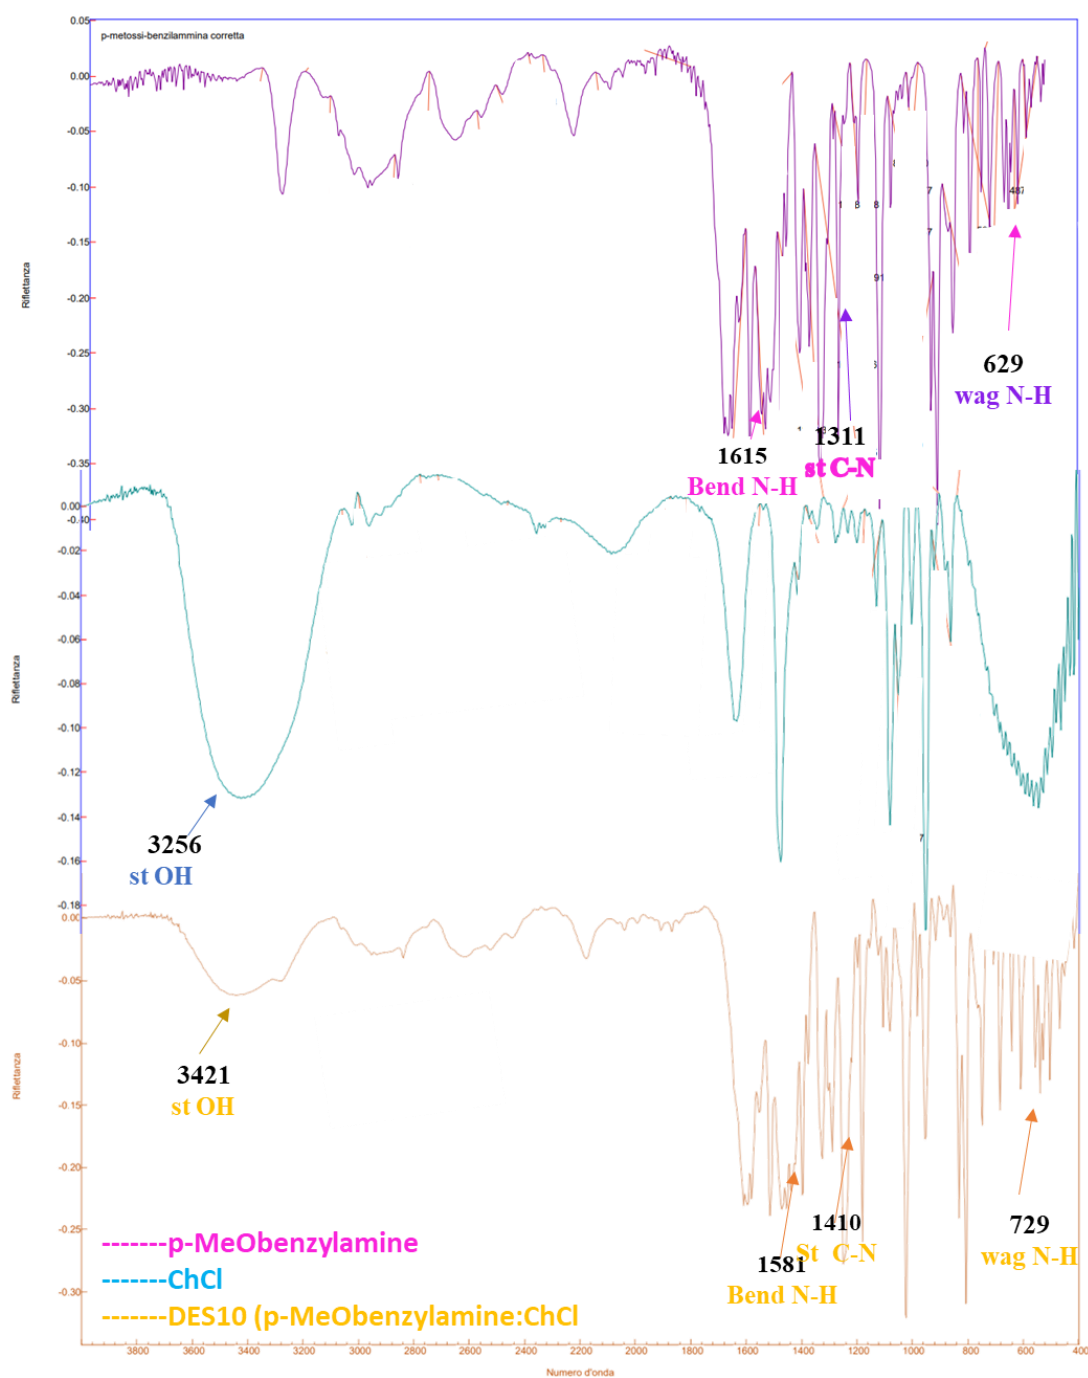

**Figure S11.** FT-IR-DES<sub>11</sub>

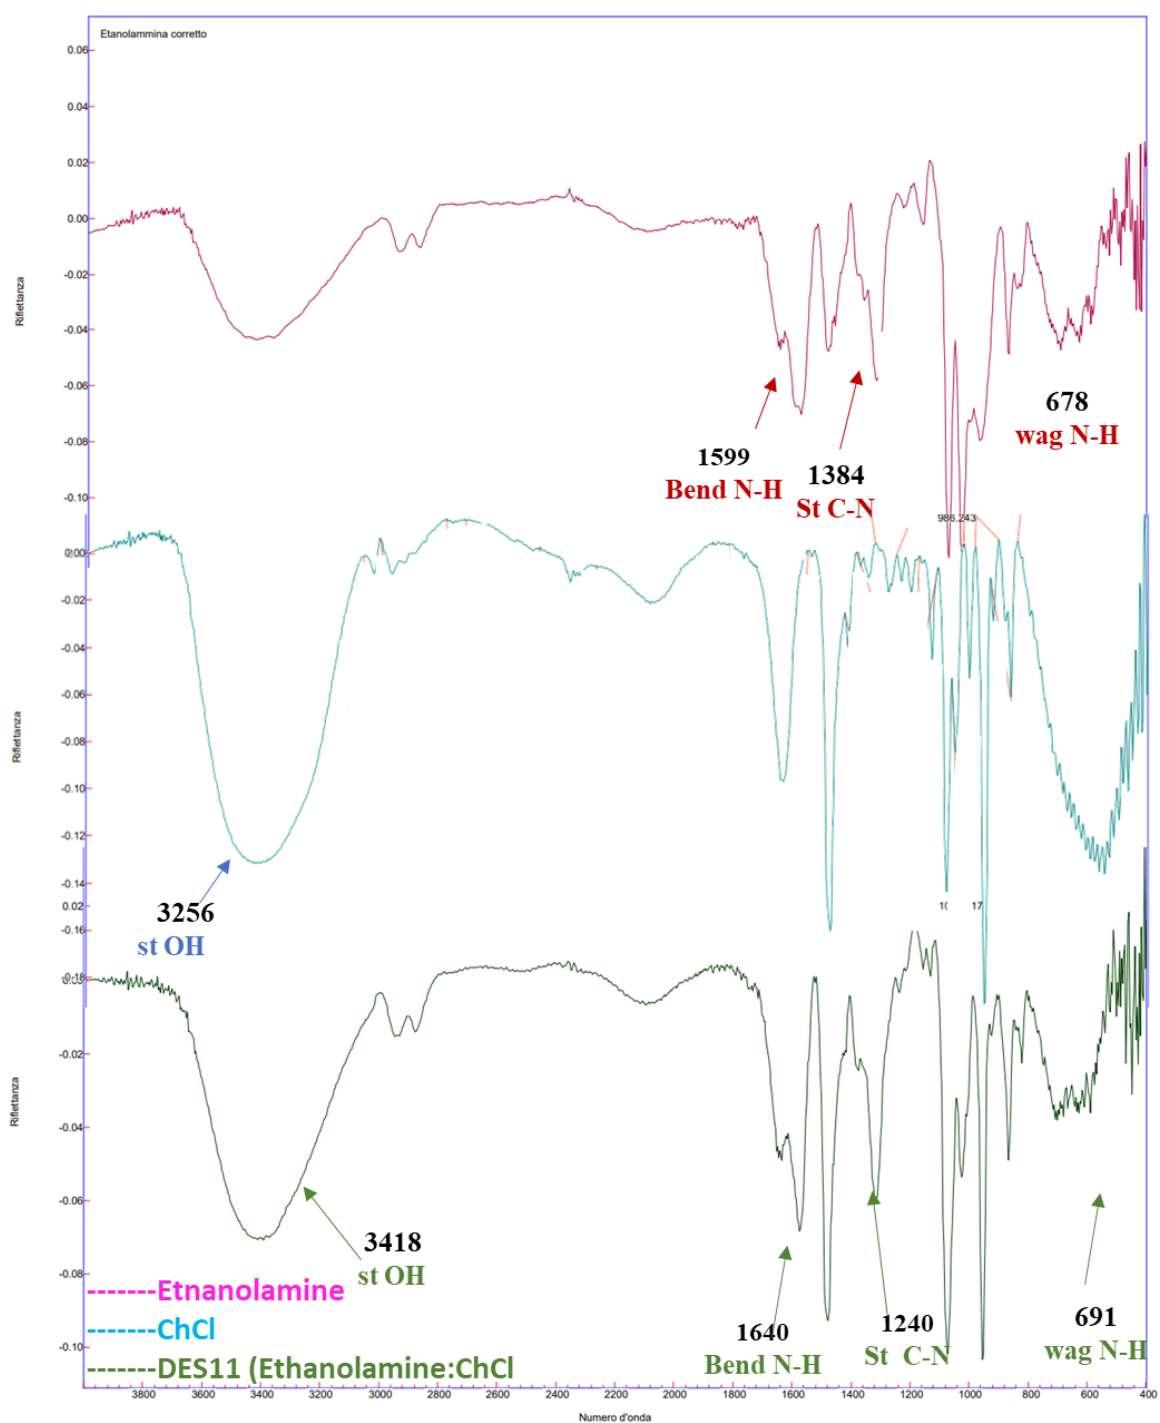

**Figure S12.** FT-IR-DES<sub>12</sub>

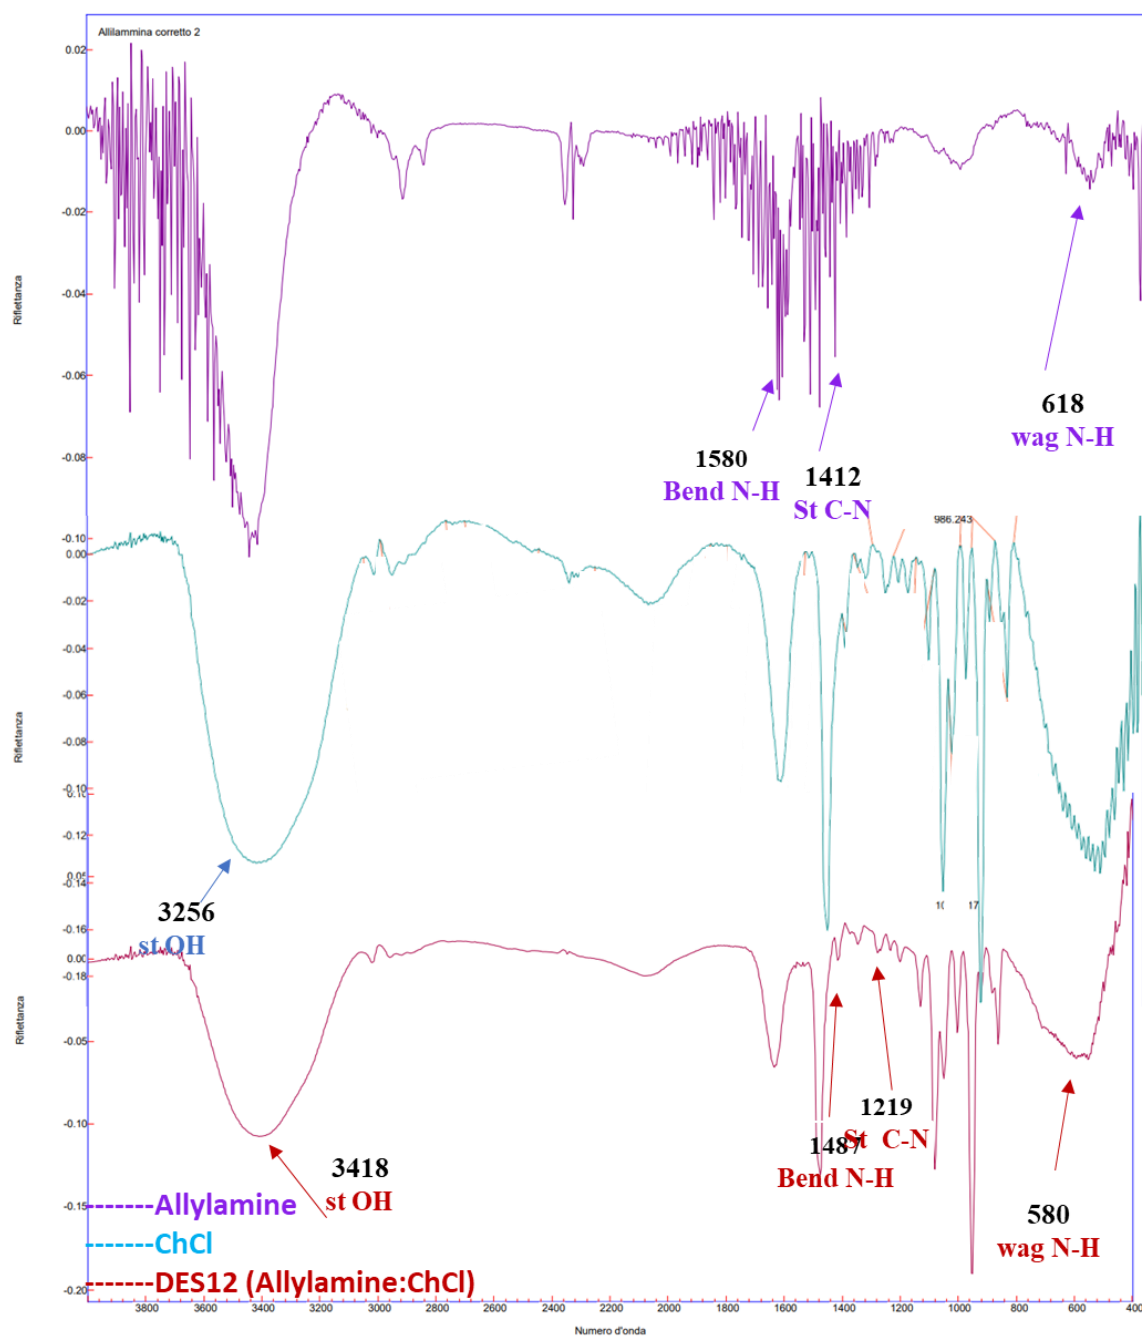



**Figure S13.** FT-IR-DES<sub>13</sub>

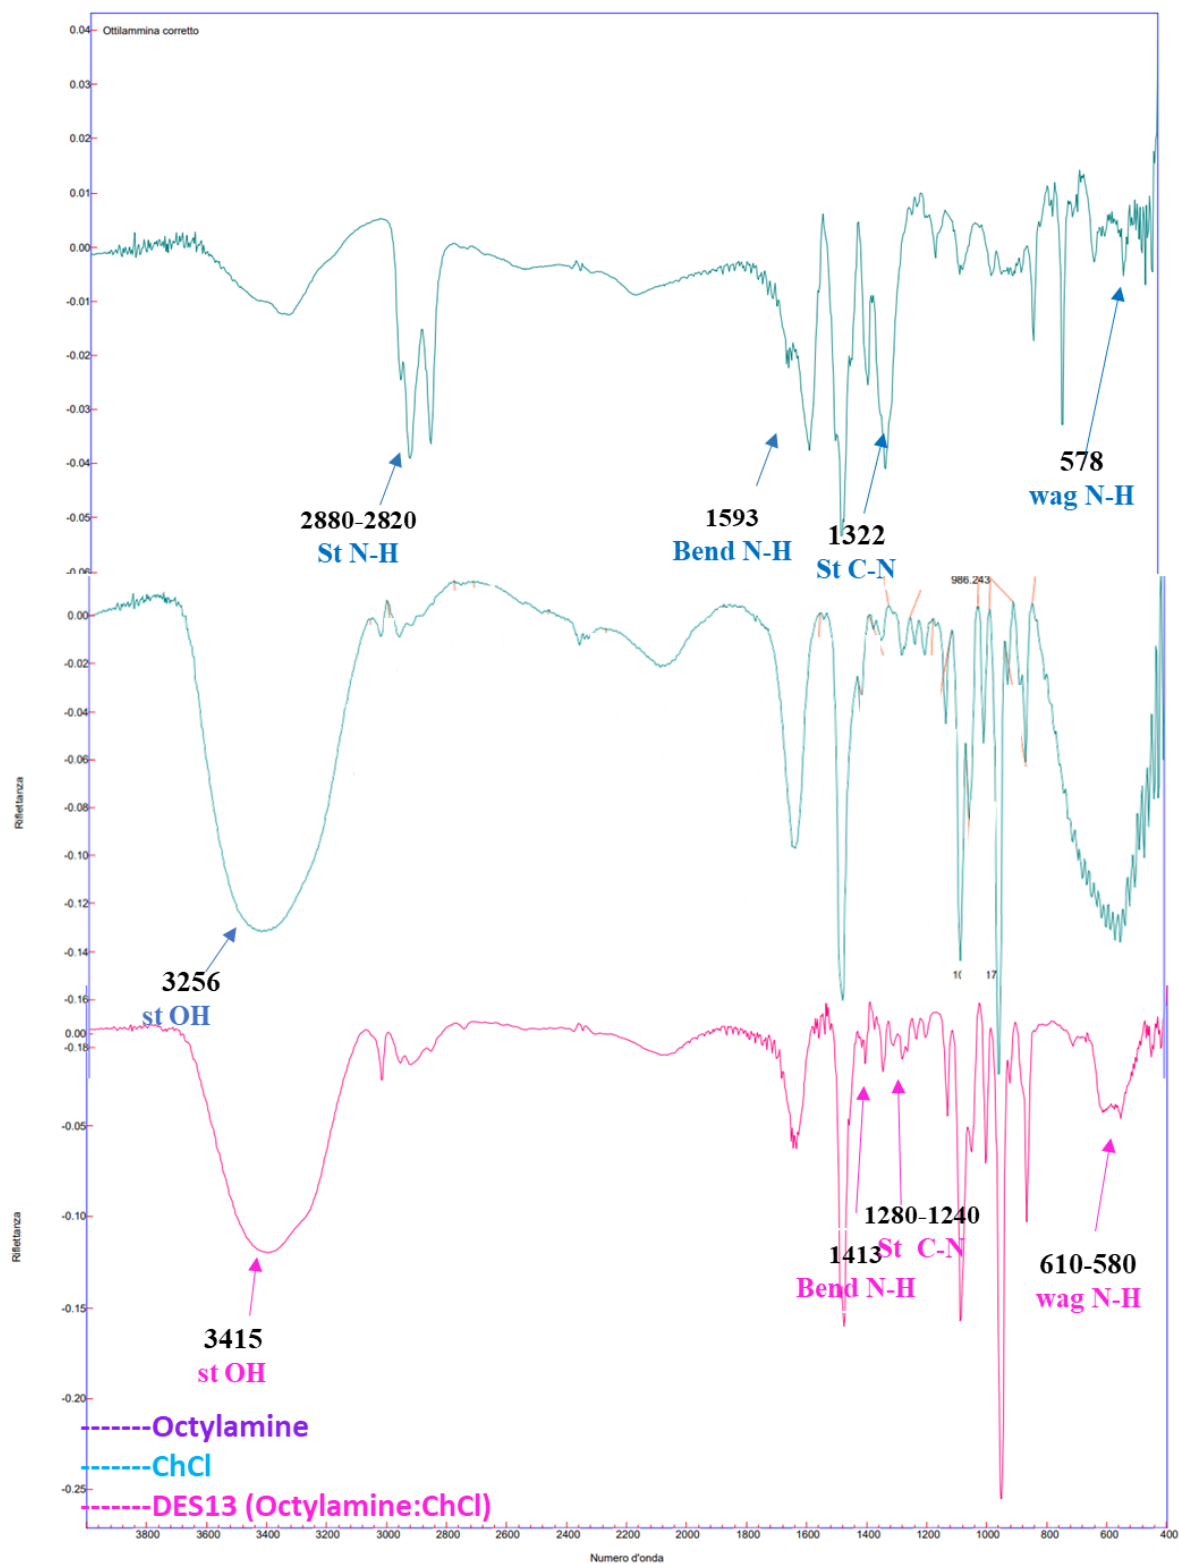

**Figure S14.** FT-IR-DES<sub>14</sub>

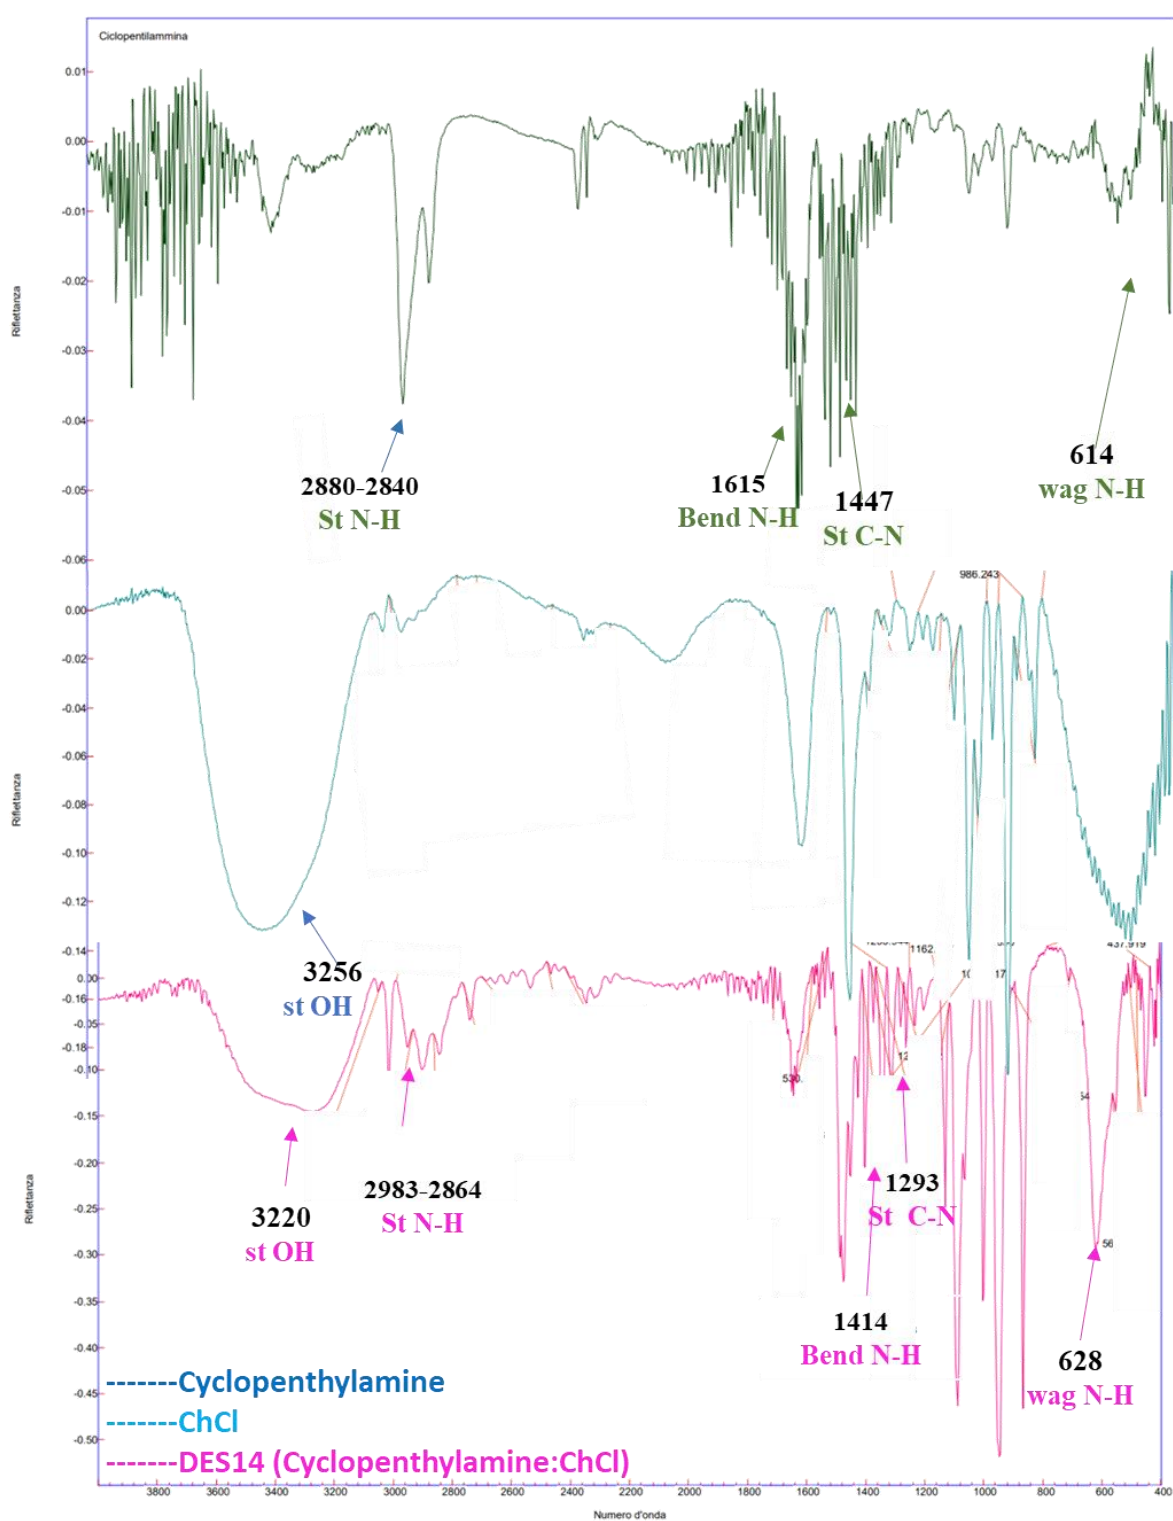

**Figure S15.**  $^1\text{H}$ -NMR- DES<sub>1</sub>

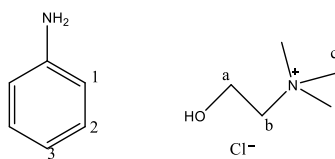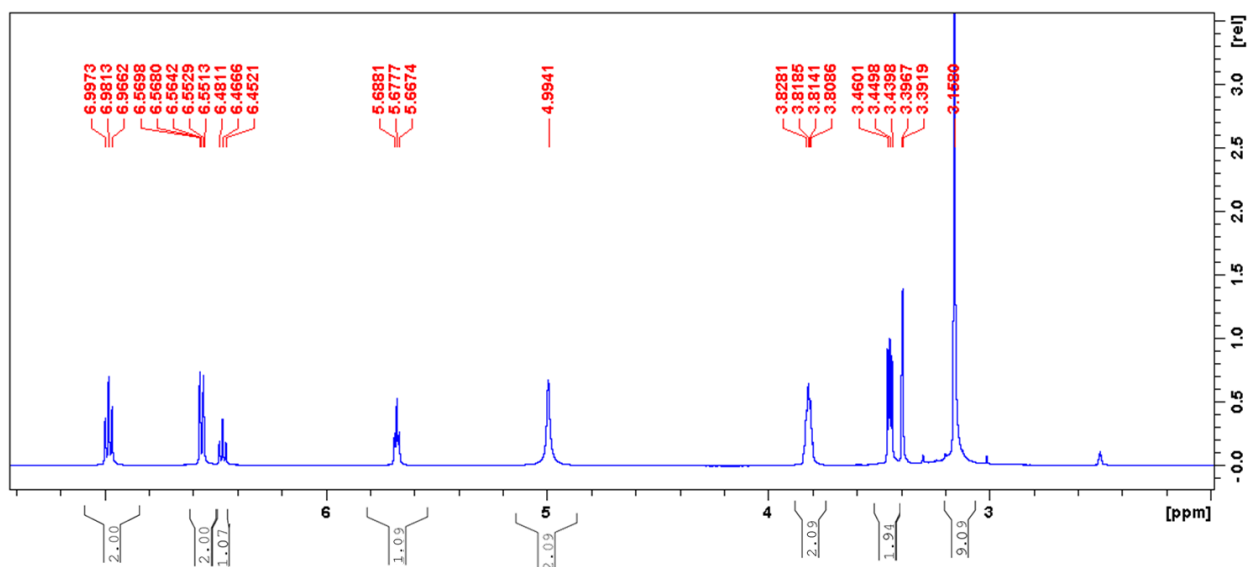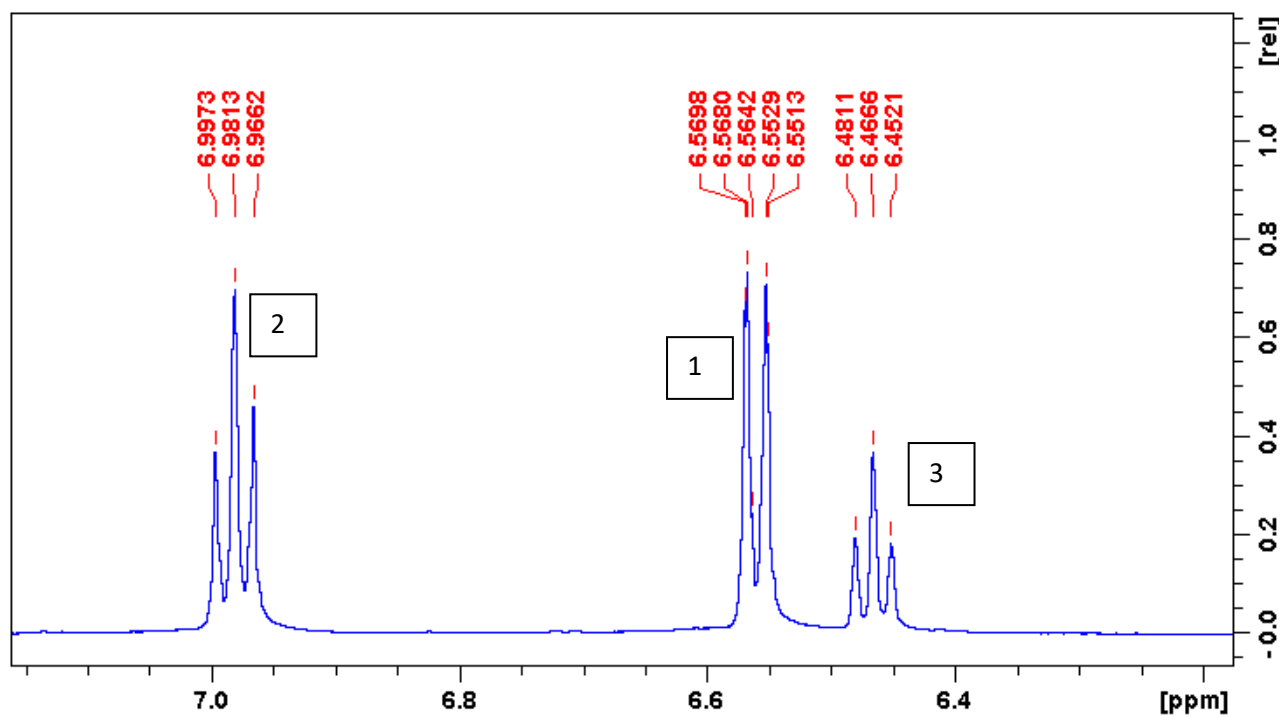

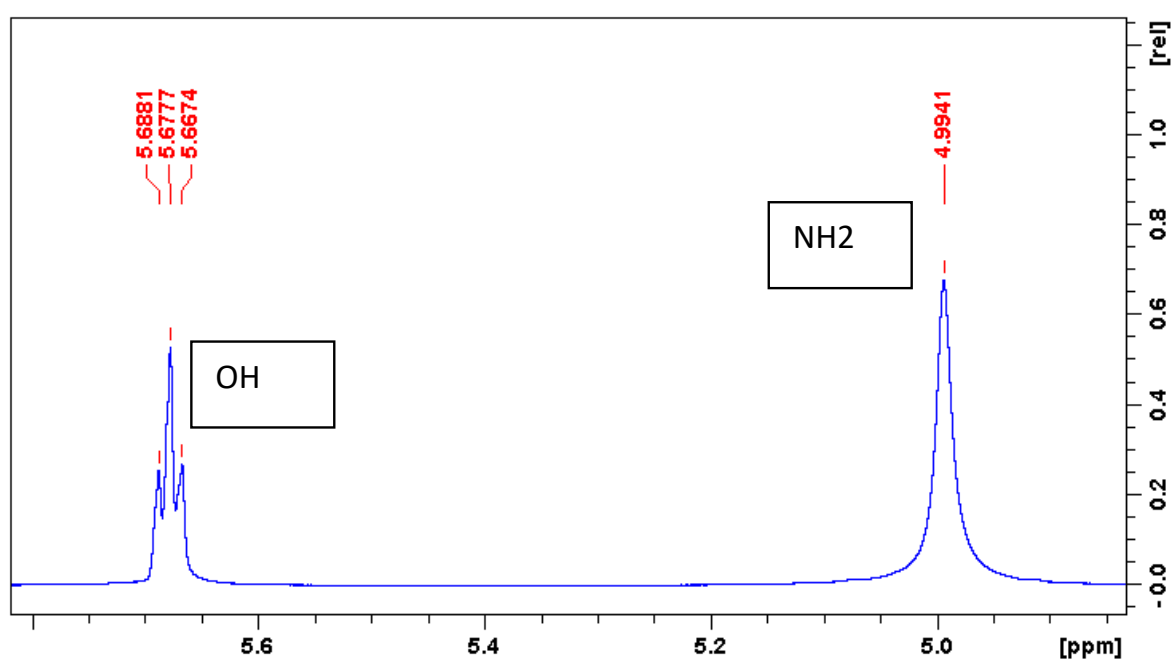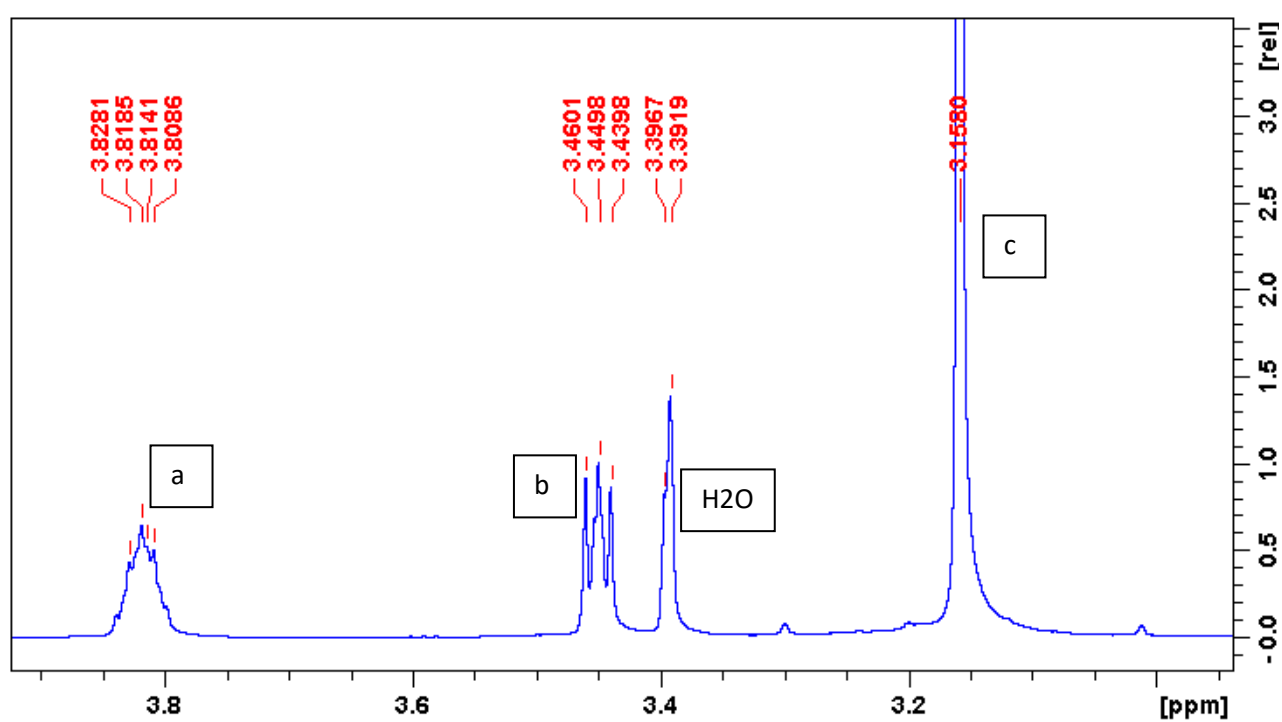

**Figure S16.**  $^{13}\text{C}$ -NMR- DES<sub>1</sub>

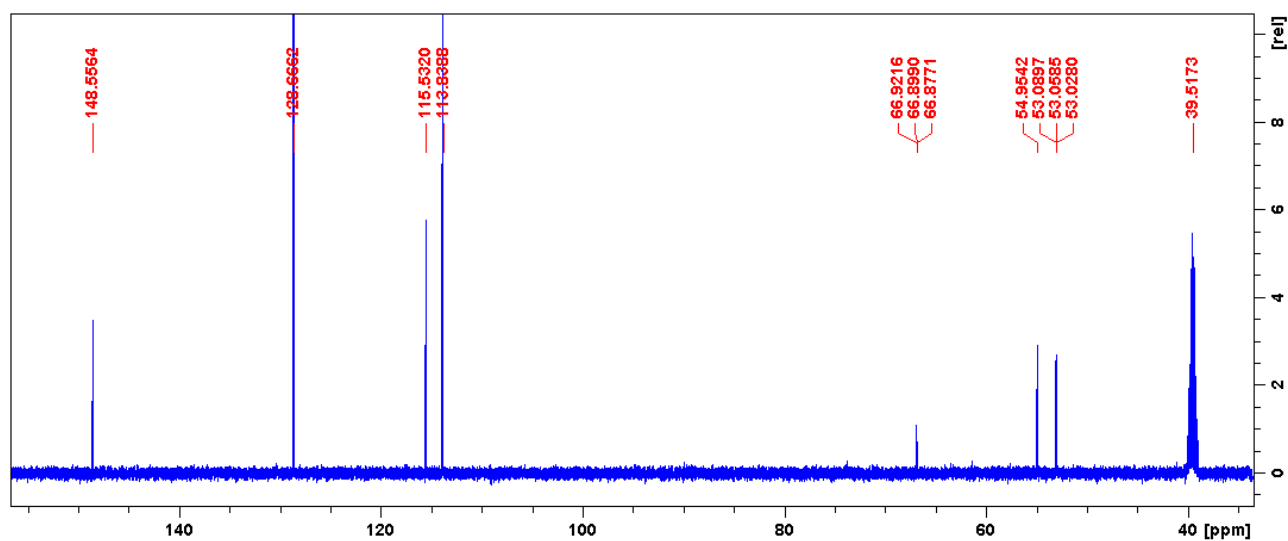

**Figure S17.** HMQC- DES<sub>1</sub>

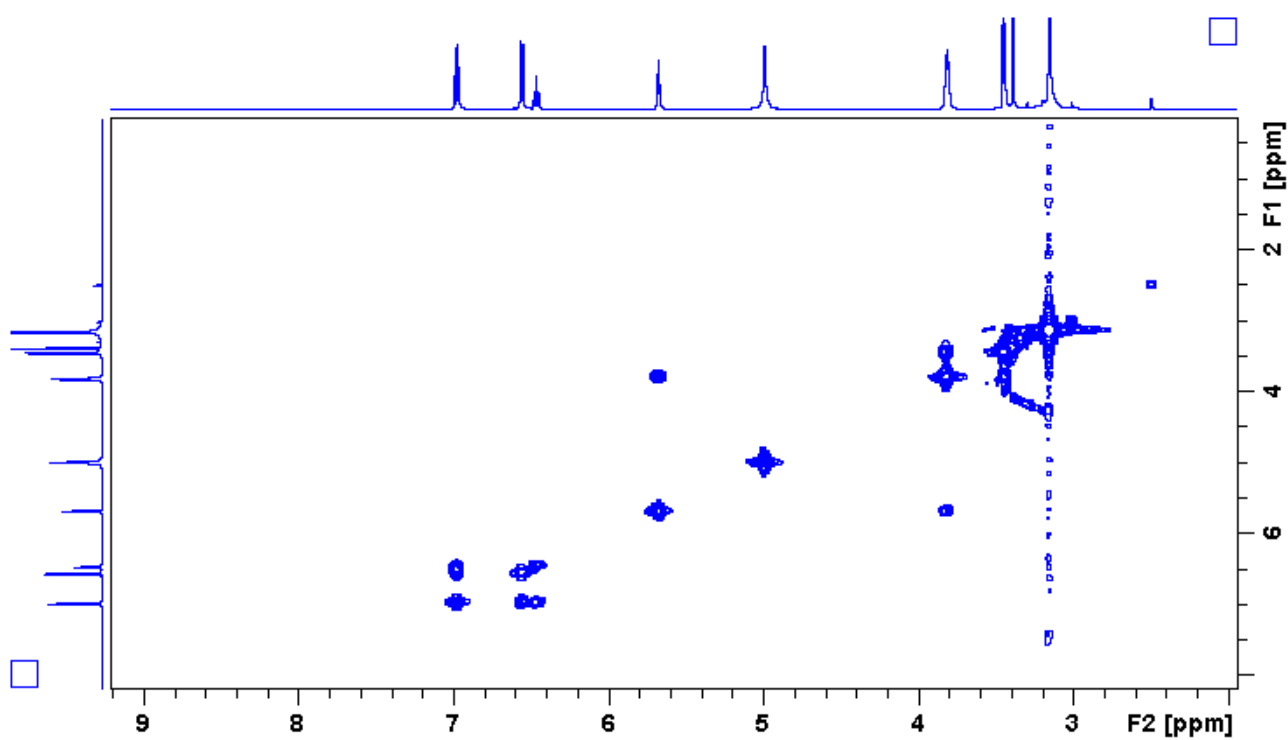

**Figure S18.** COSY- DES<sub>1</sub>

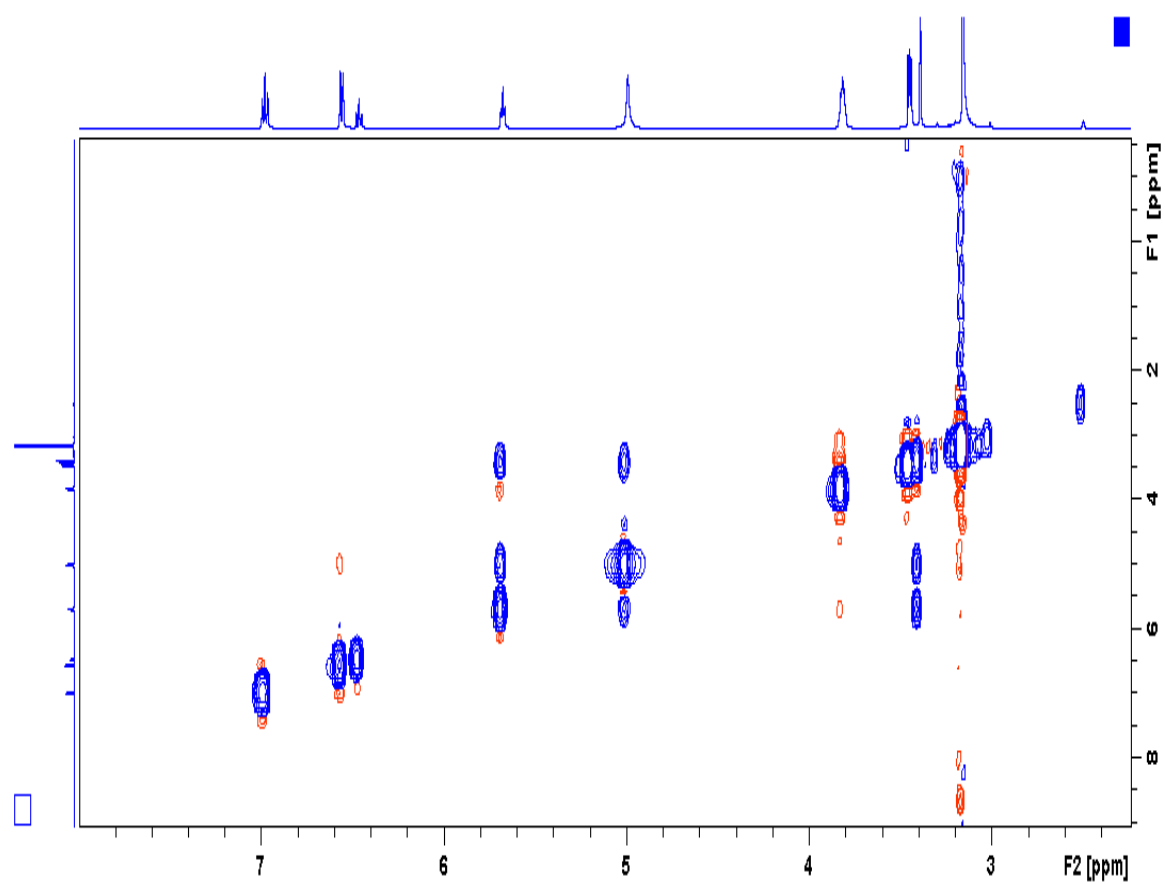

**Figure S19.** NOESY - DES<sub>1</sub>

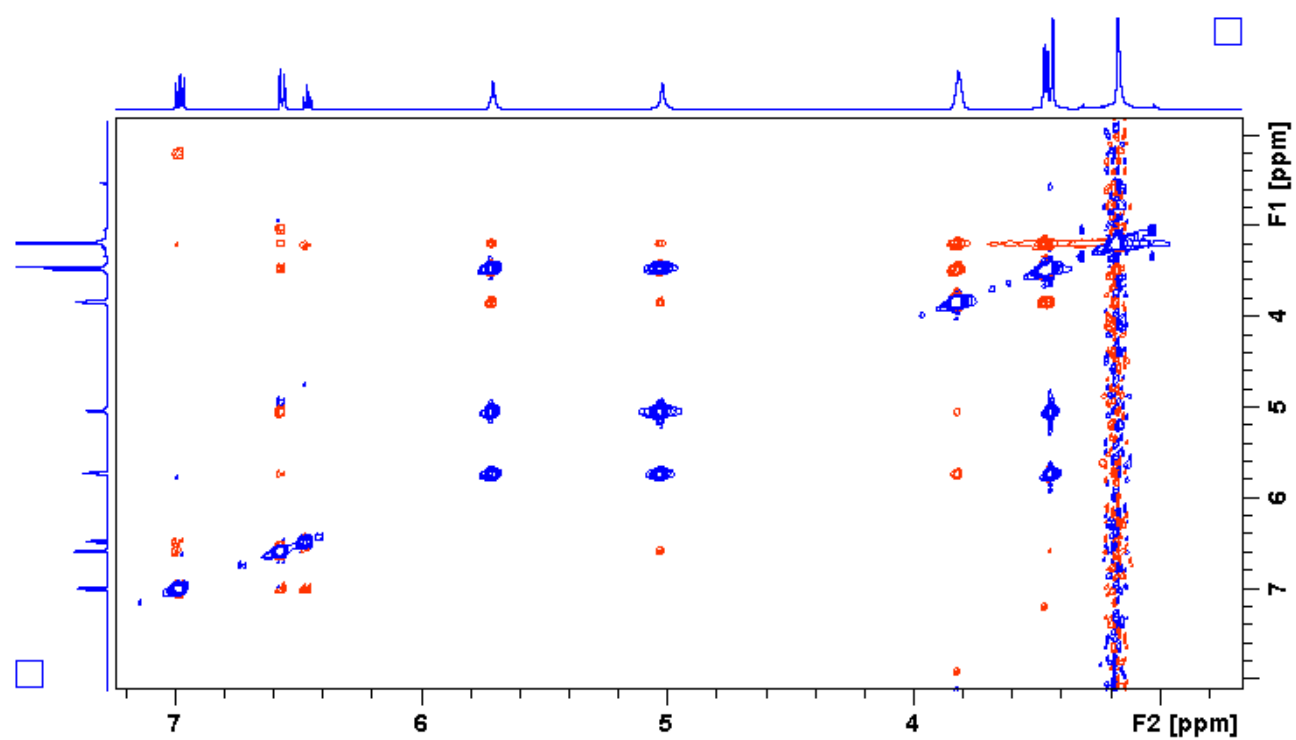

Noesy D8 = 900 ms

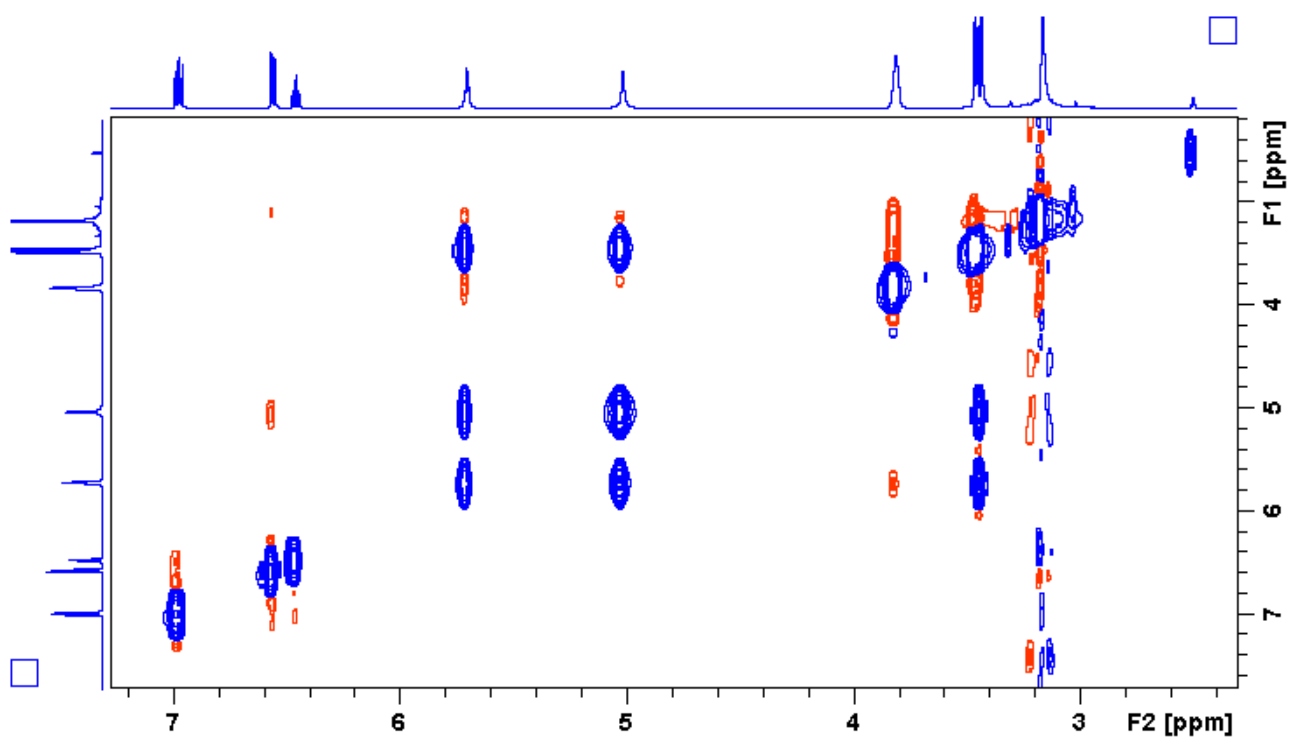

Noesy  $D_8 = 800$  ms

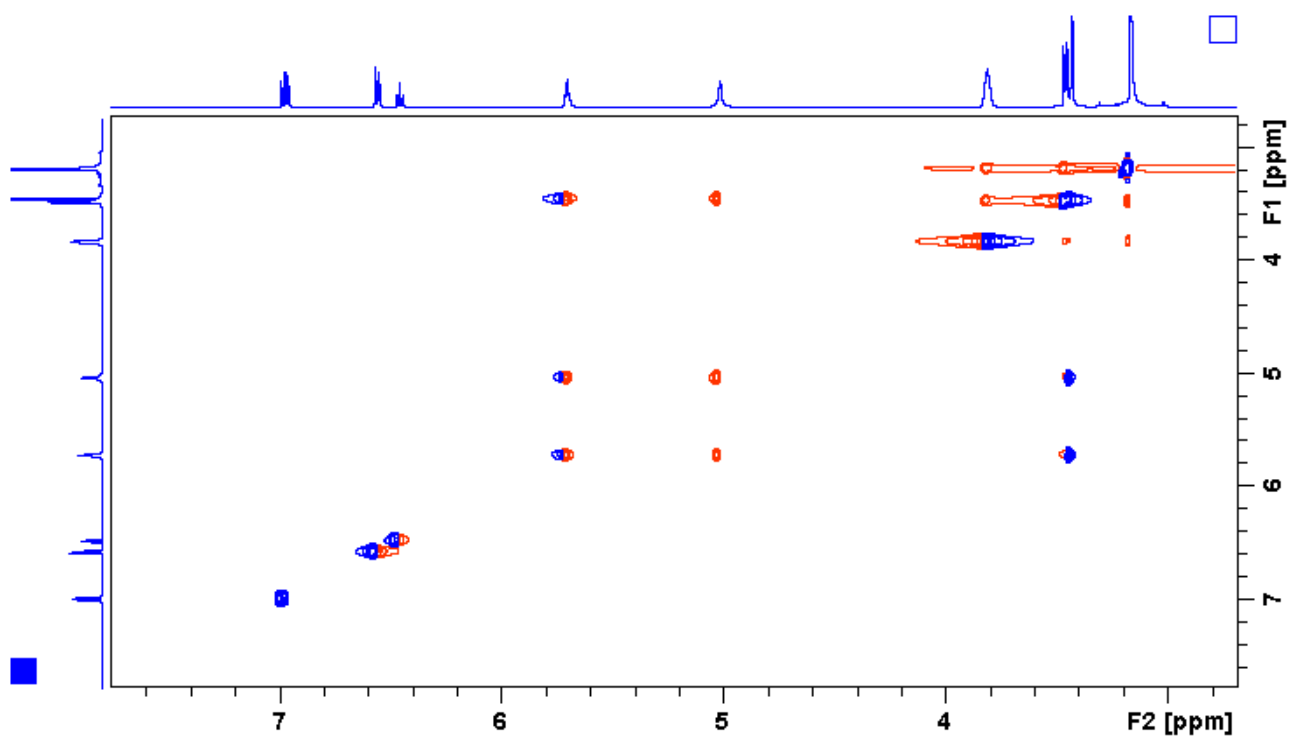

Noesy  $D_8 = 1.1$  s

**Figure S20.**  $^1\text{H}$ -NMR- DES<sub>2</sub>

campione sali di p-cloro anilina DES2 in DMSO T= 305 K 20 Luglio 2022

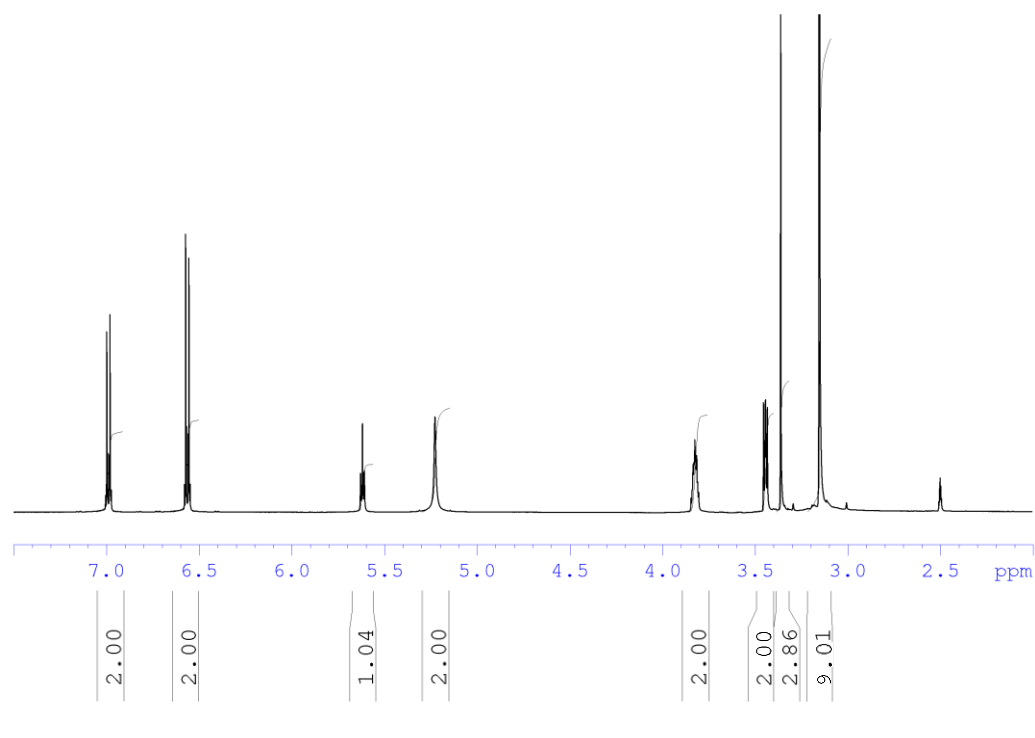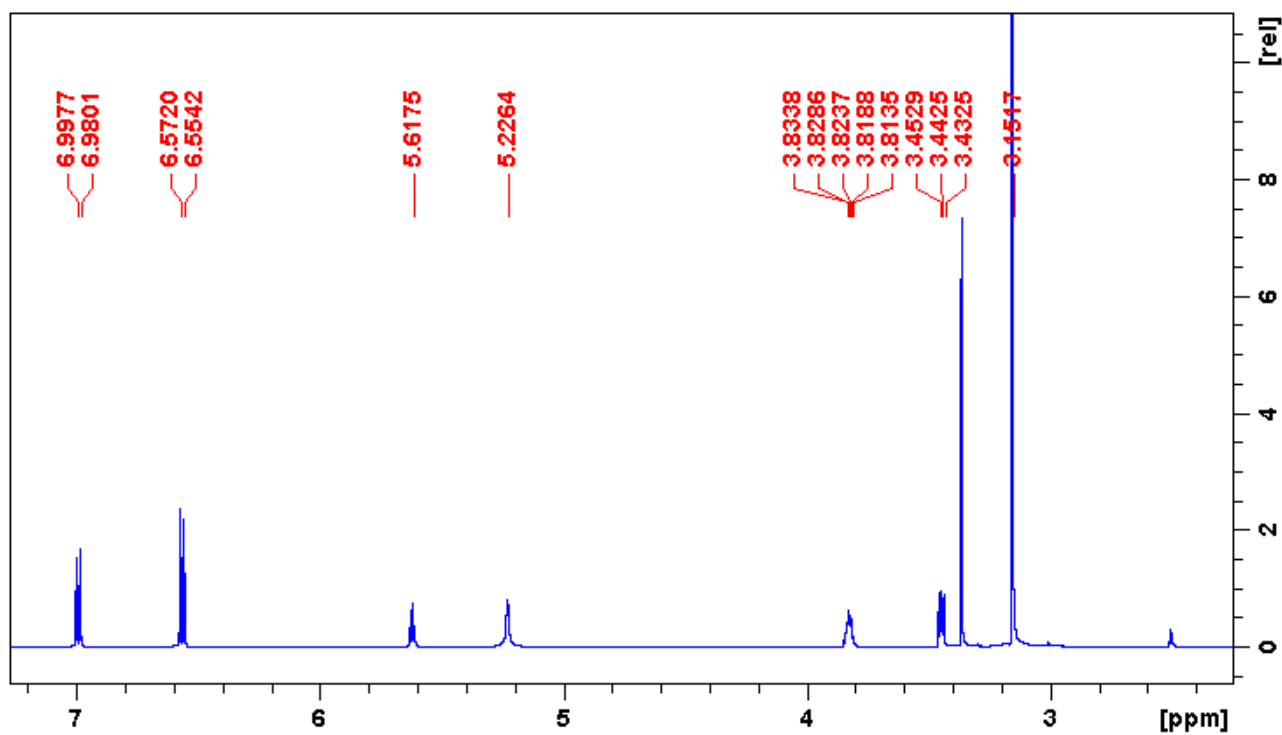



**Figure S21.**  $^{13}\text{C}$ -NMR-  $\text{DES}_2$

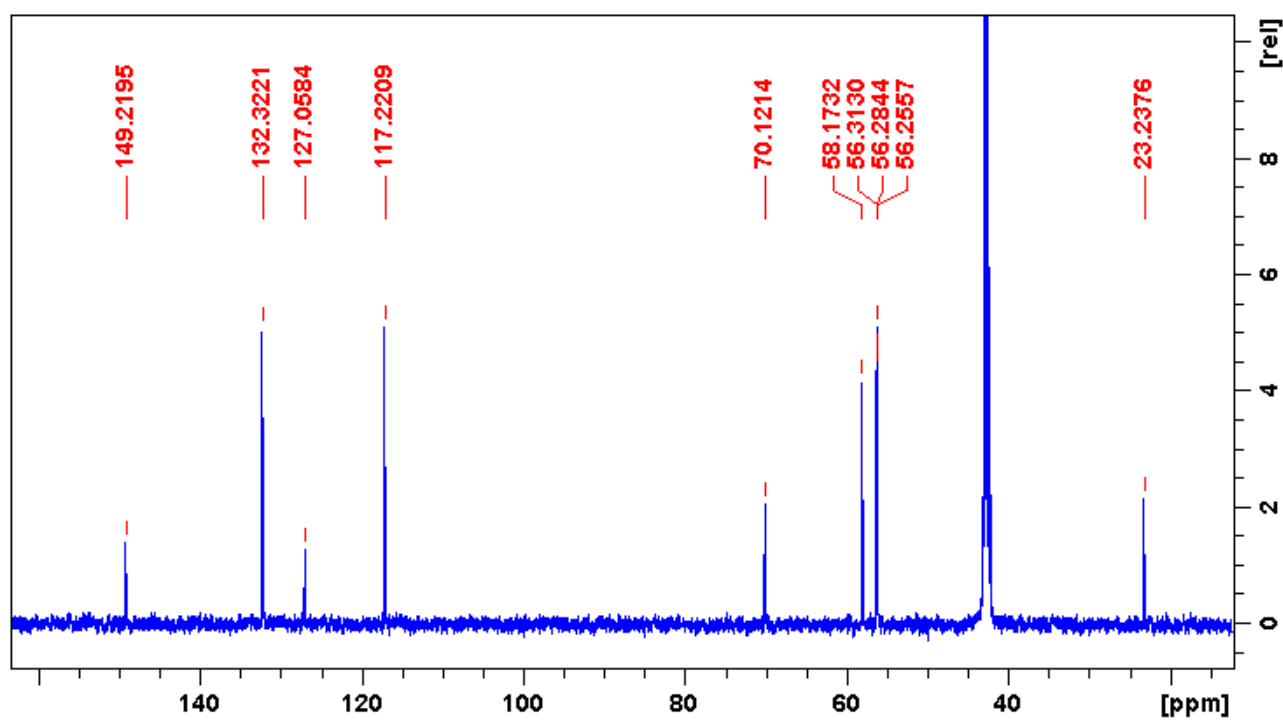

**Figure S22.** NOESY-  $\text{DES}_2$

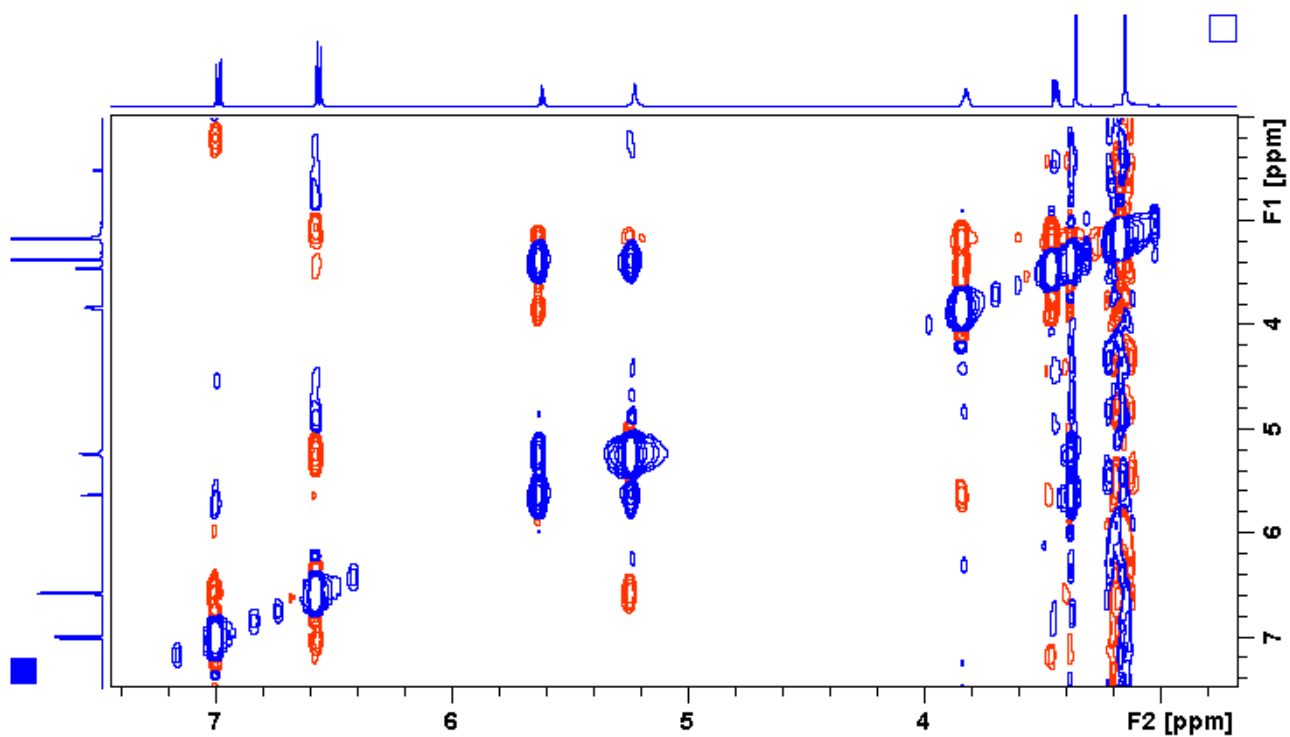

NOESY  $T_{\text{mix}} = 900$  ms

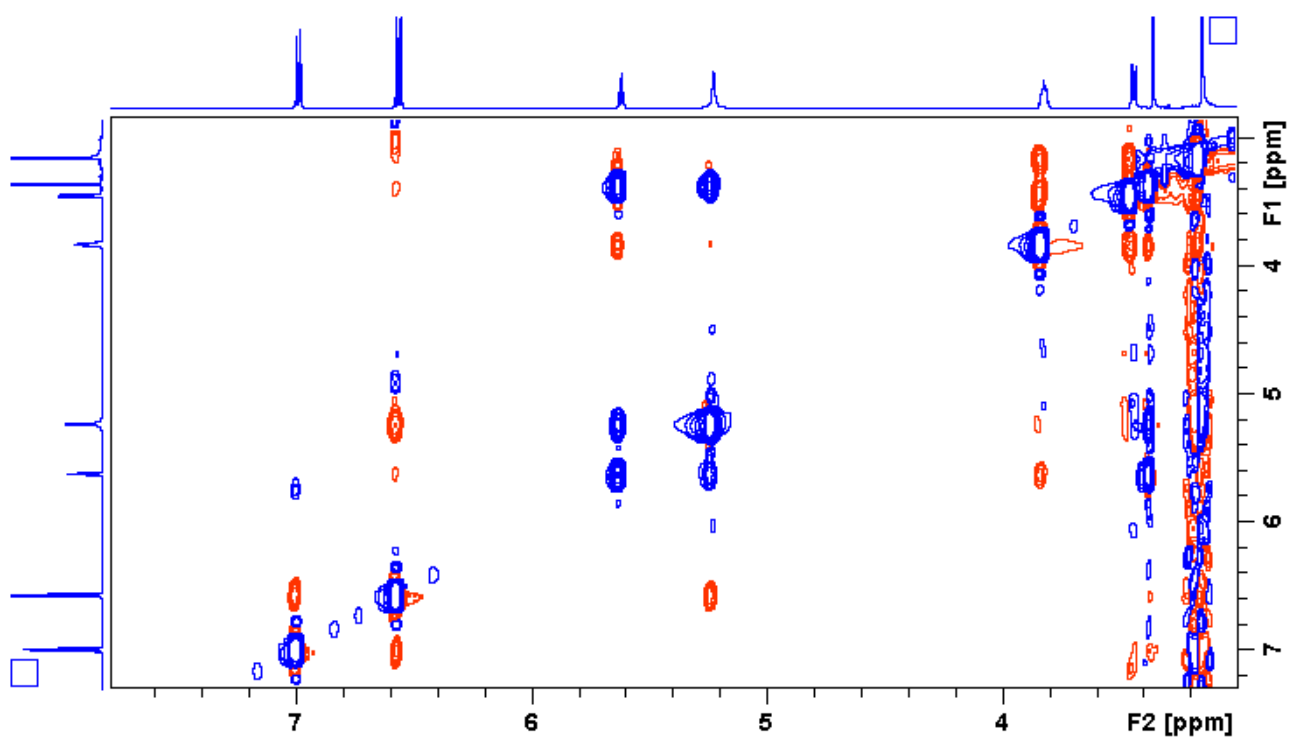

NOESY Tmix= 1.2 s

**Figure S23.**  $^1\text{H}$ -NMR – DES<sub>3</sub>

campione sali di p-CH<sub>3</sub> anilina DES3 in DMSO T= 305 K 20 Luglio 2022

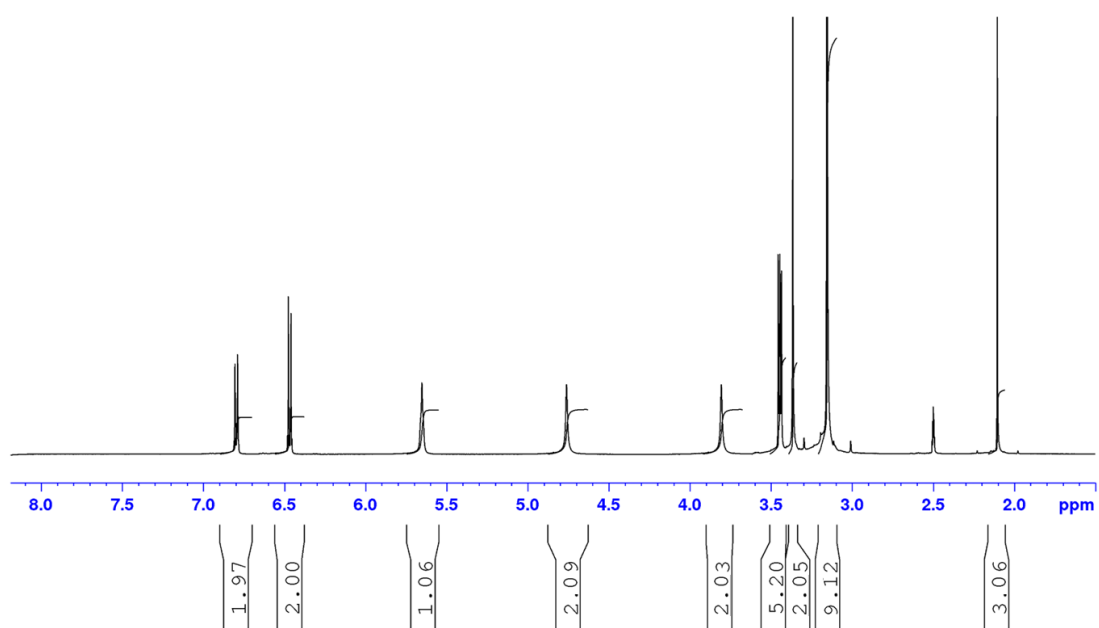

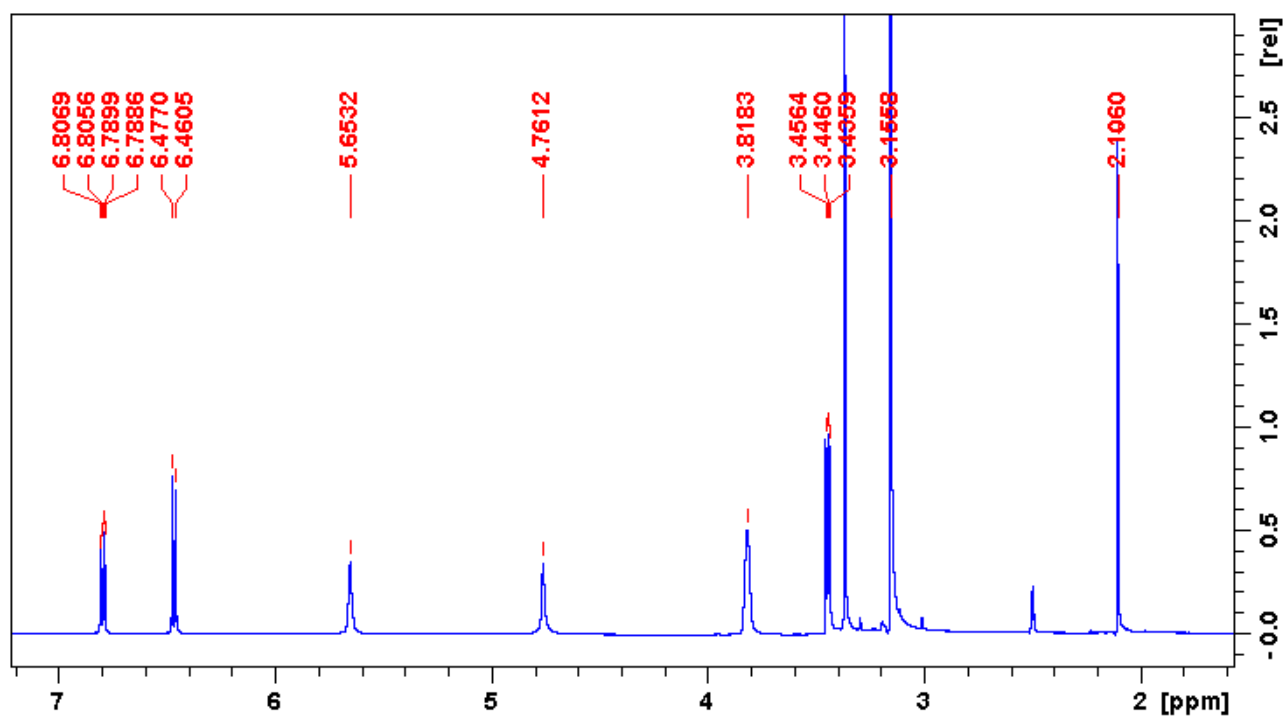

Figure S24. <sup>13</sup>C-NMR- DES<sub>3</sub>



**Figure S25.** NOESY- DES<sub>3</sub>

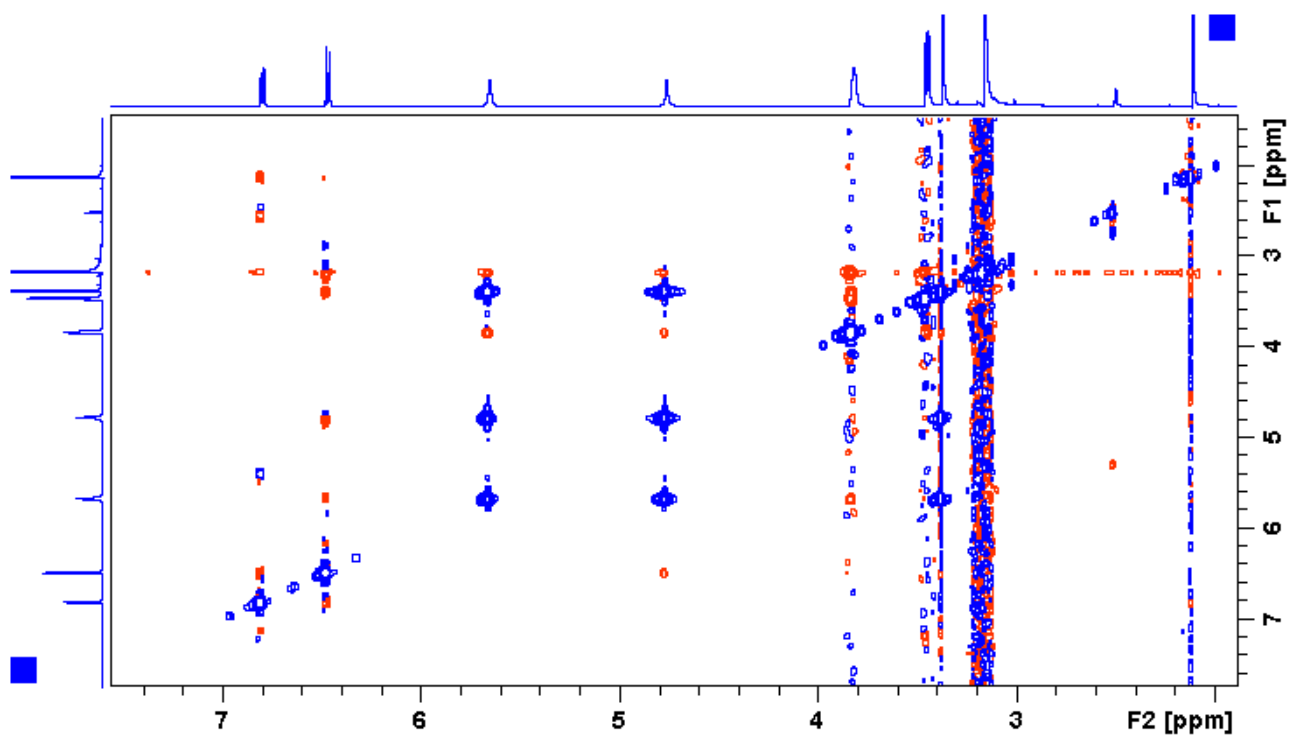

NOESY T<sub>mix</sub>= 900 ms

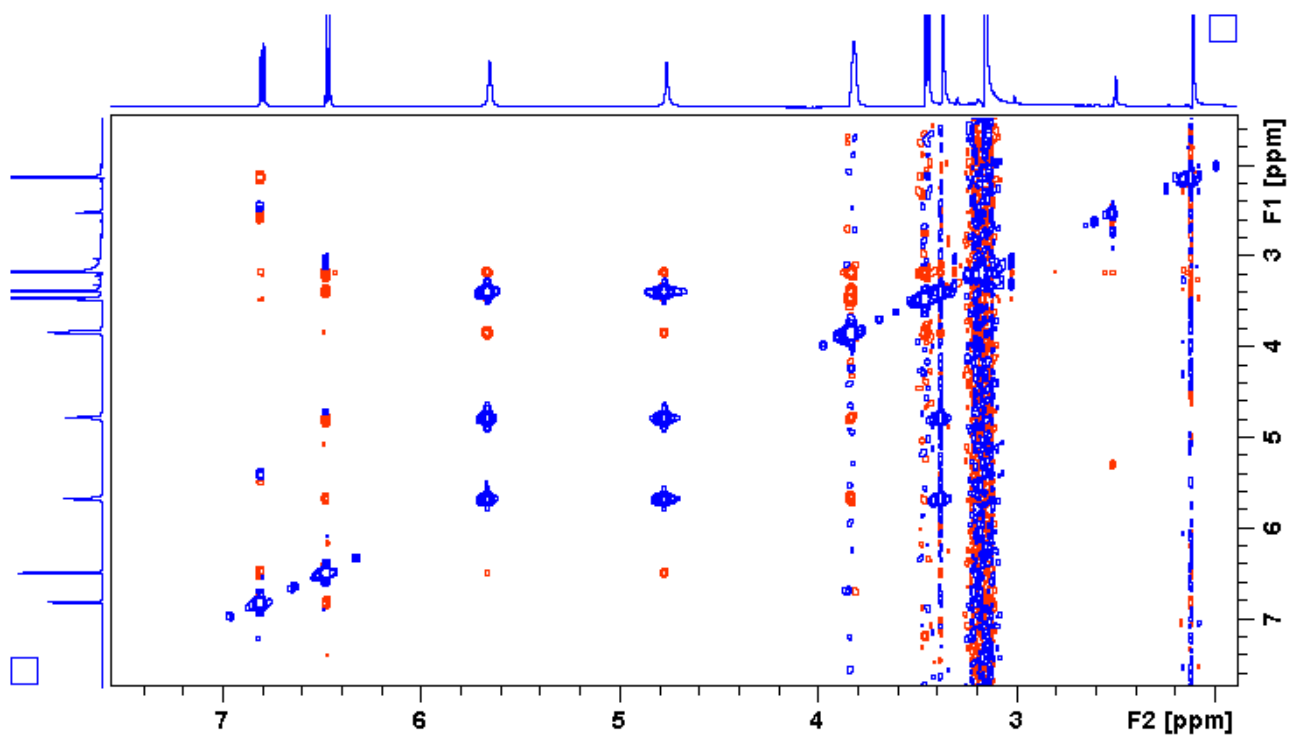

NOESY T<sub>mix</sub>= 1.2 s

**Figure S26.**  $^1\text{H}$ -NMR – DES<sub>4</sub>

campione sali di DES 4 in DMSO T= 305 K 20 Luglio 2022

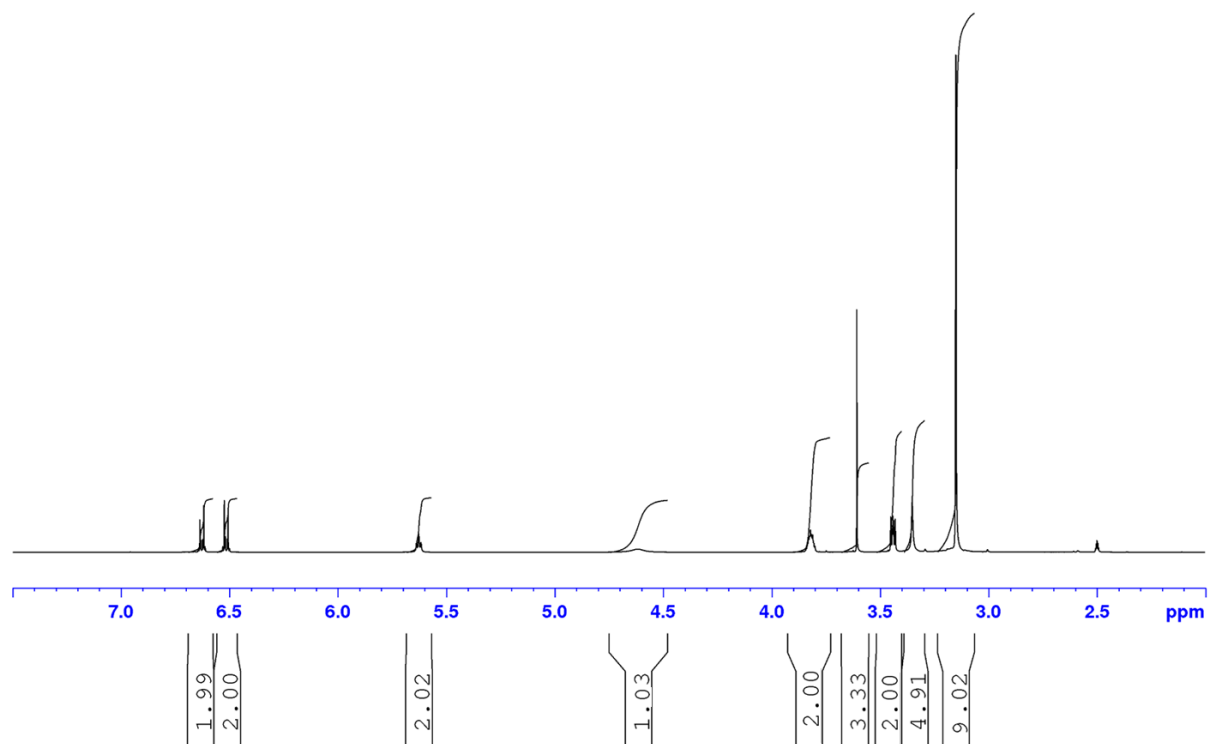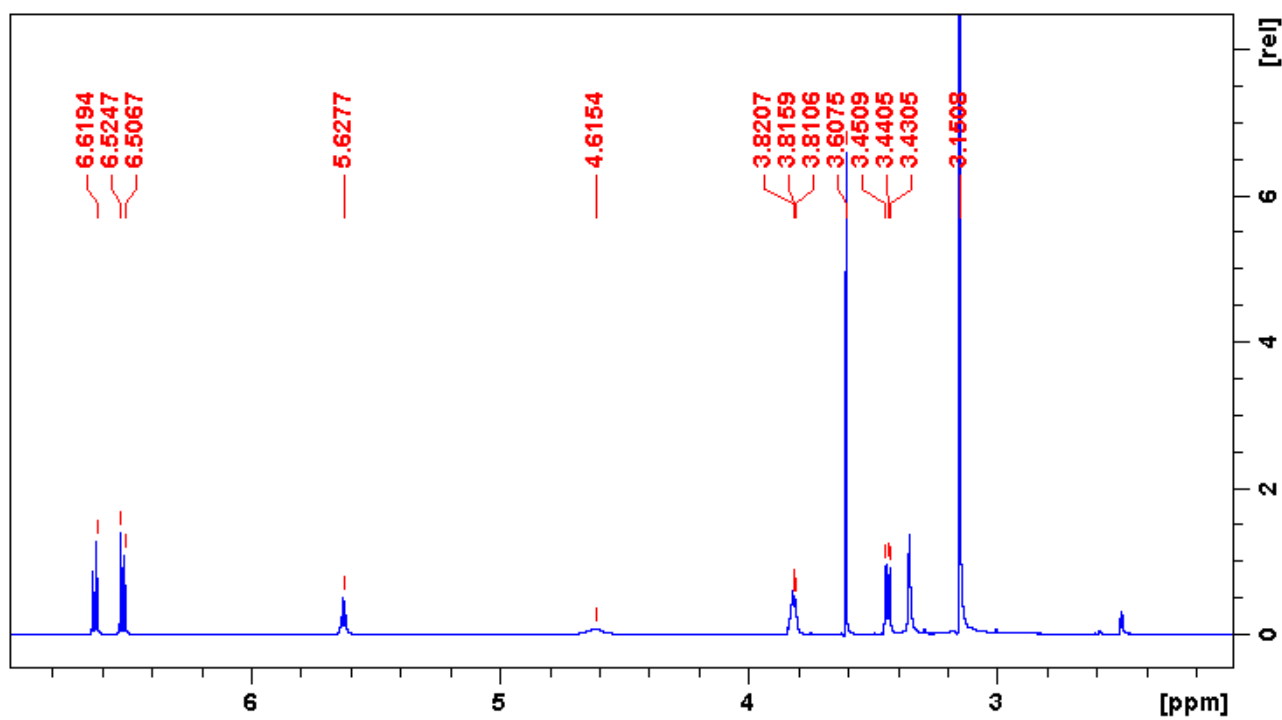

Figure S27.  $^{13}\text{C}$ -NMR- DES<sub>4</sub>

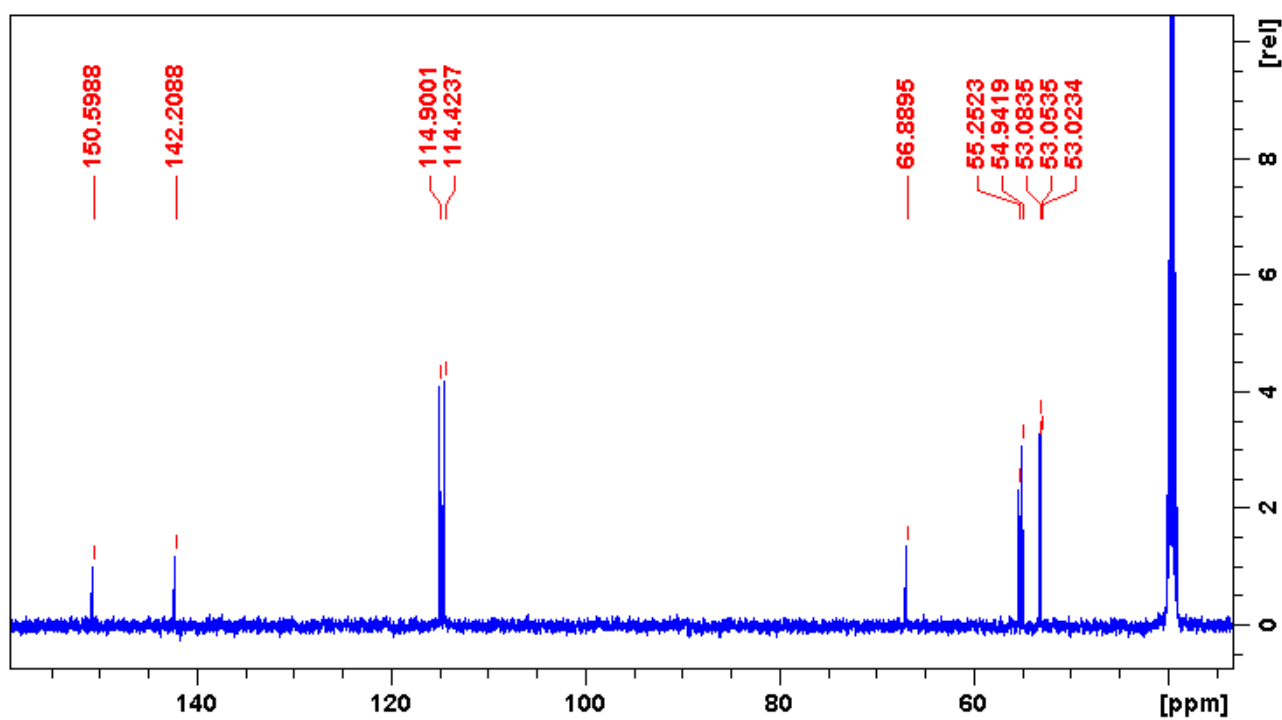

Figure S28. NOESY- DES<sub>4</sub>

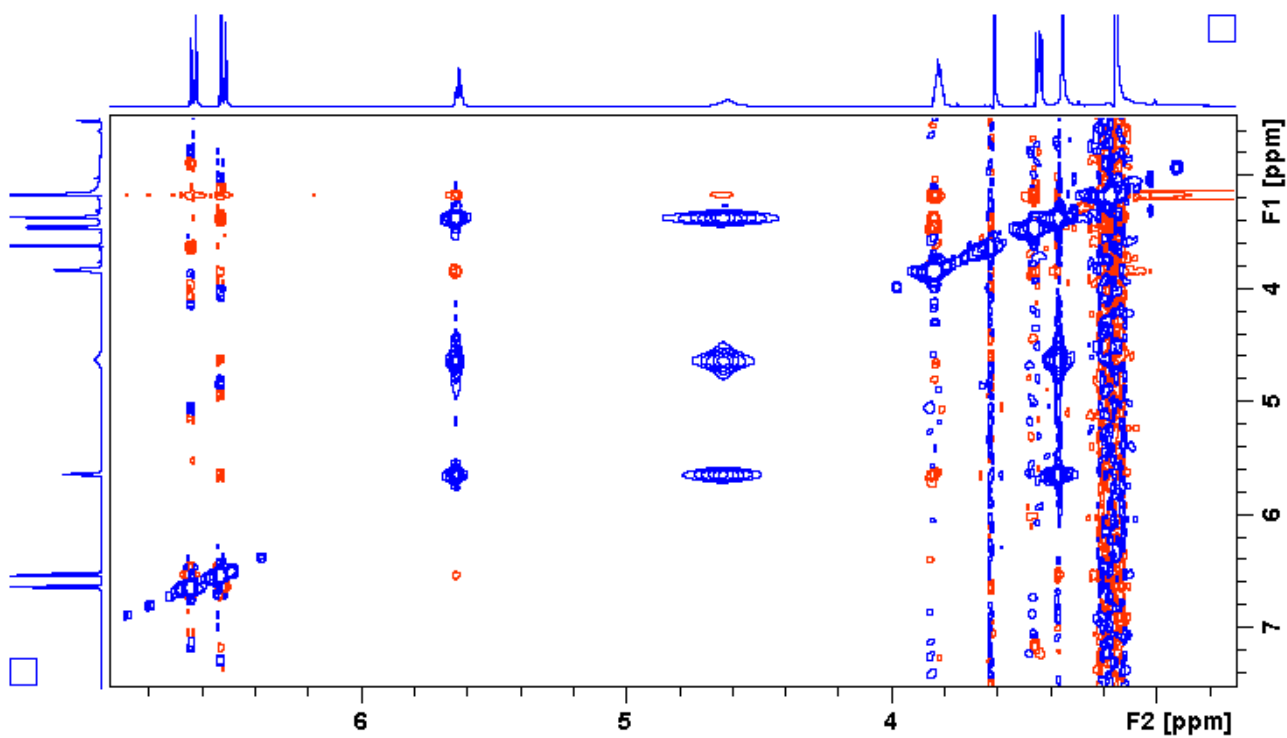

Noesy d8 = 900 ms

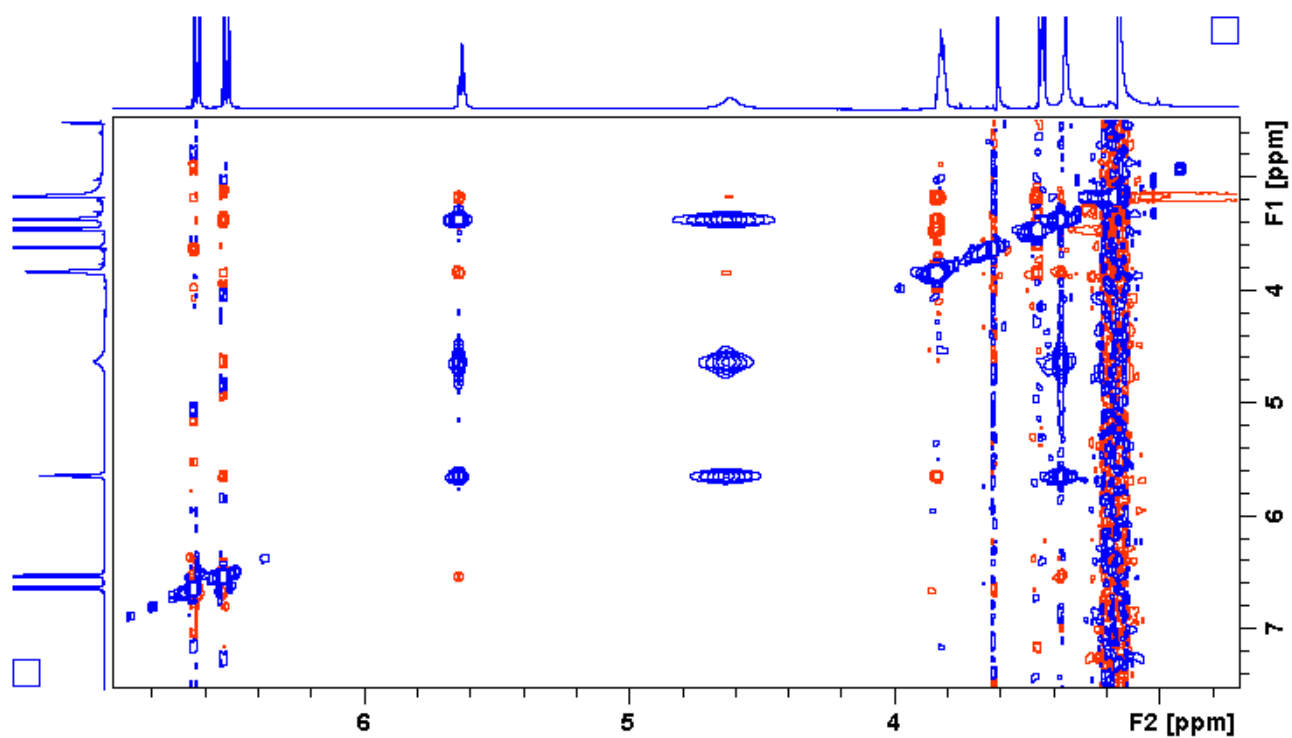

Noesy Tmix = 1.2 s

**Figure S29.**  $^1\text{H}$ -NMR – DES<sub>5</sub>

campione sali di DES 5 in DMSO T= 305 K 20 Luglio 2022

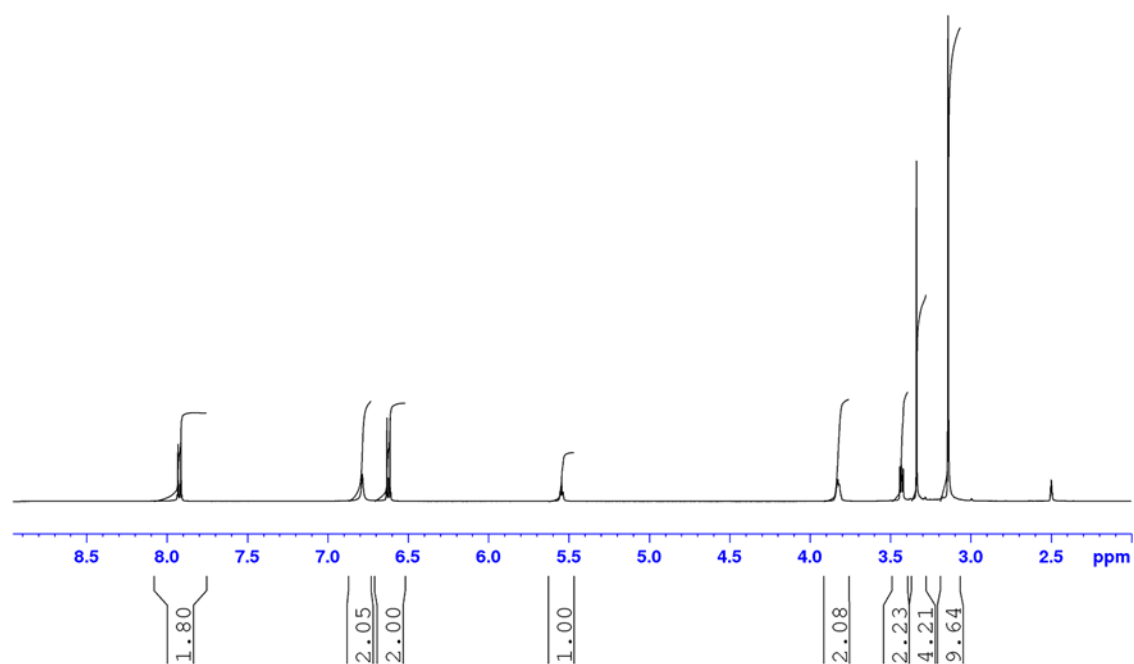

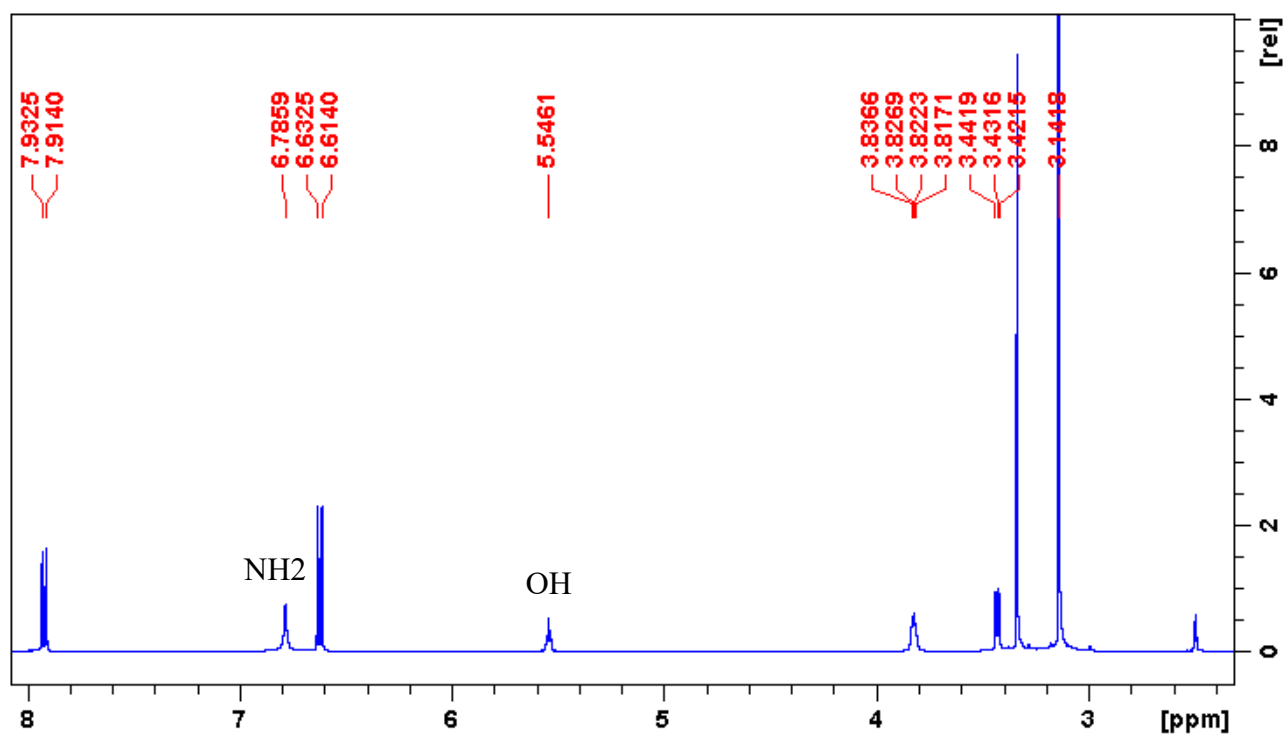

Figure S30. <sup>13</sup>C-NMR- DES<sub>5</sub>

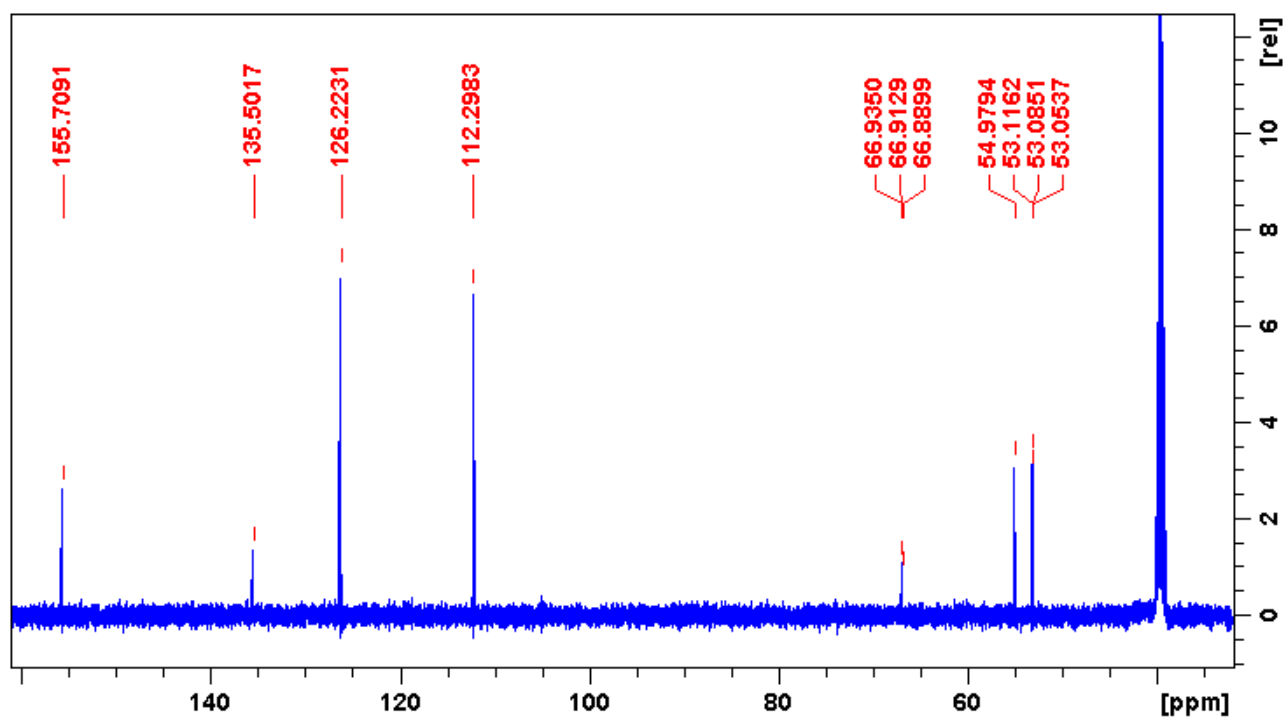



**Figure S31.** NOESY- DES<sub>5</sub>

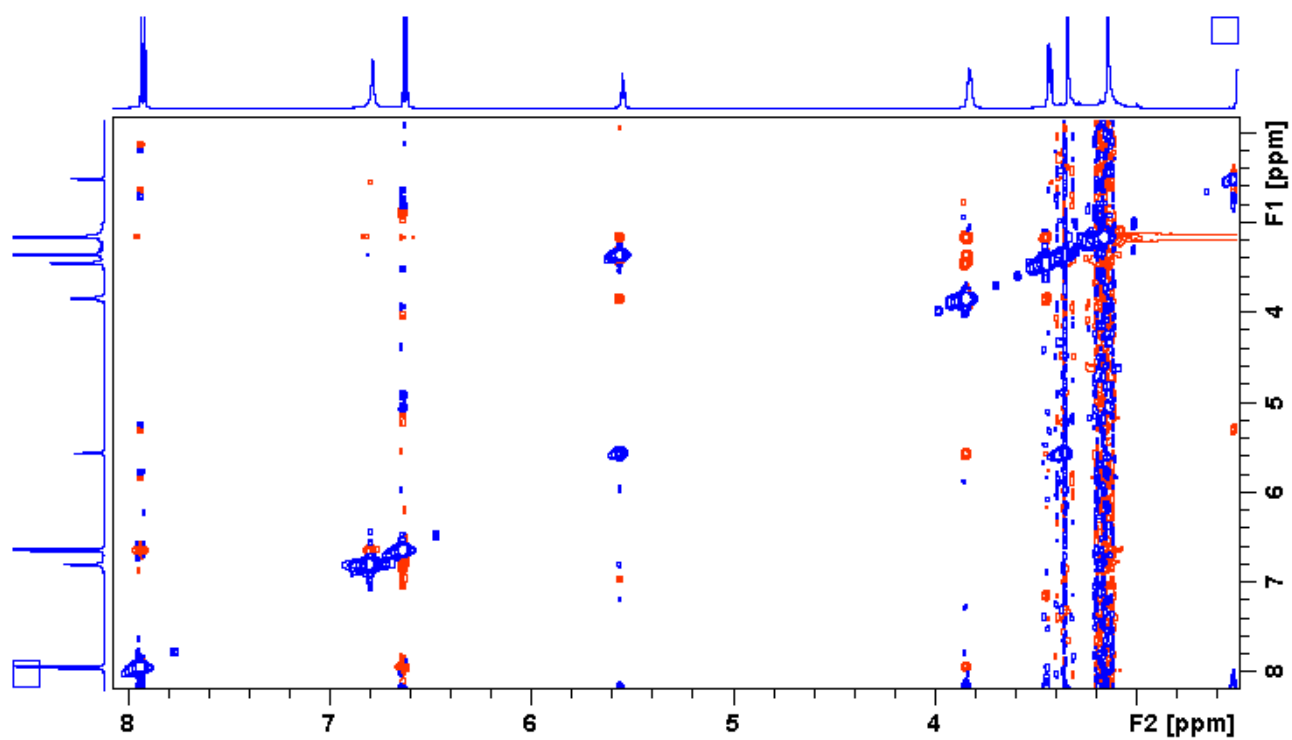

Noesy Tmix = 900 ms

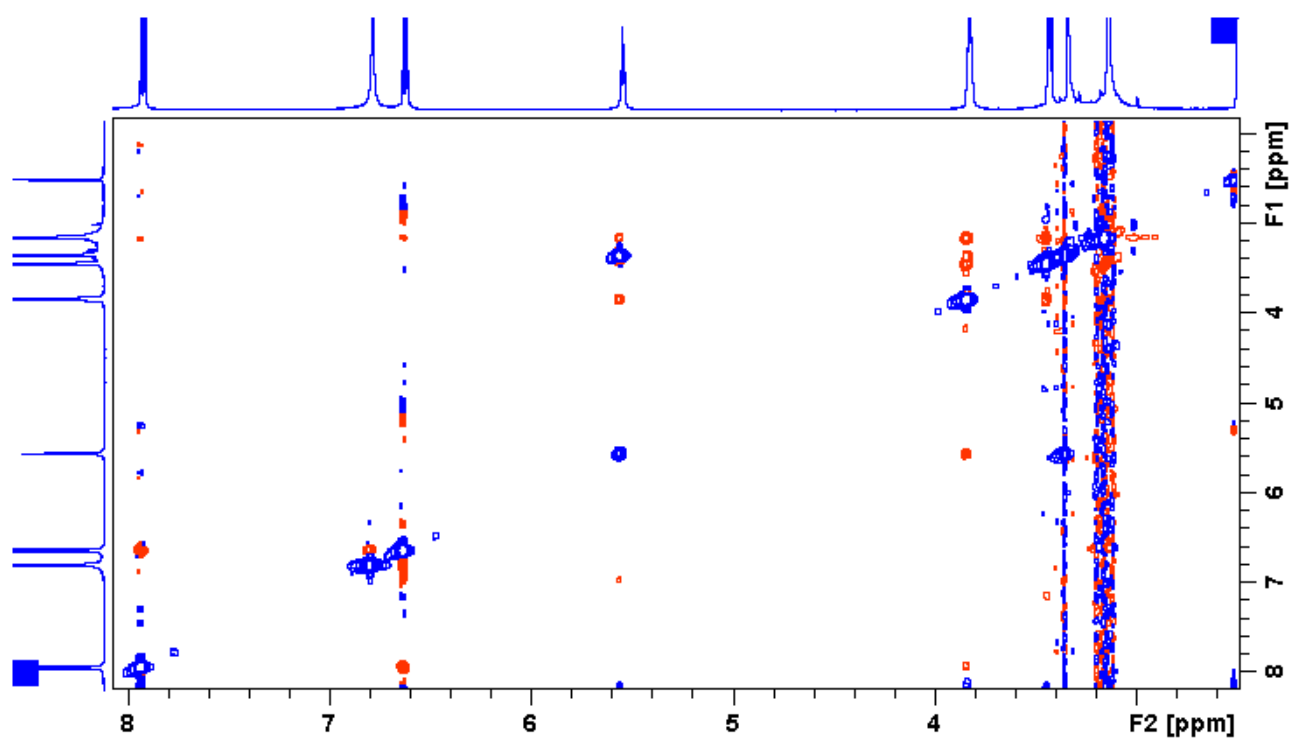

Noesy Tmix = 1.2 s

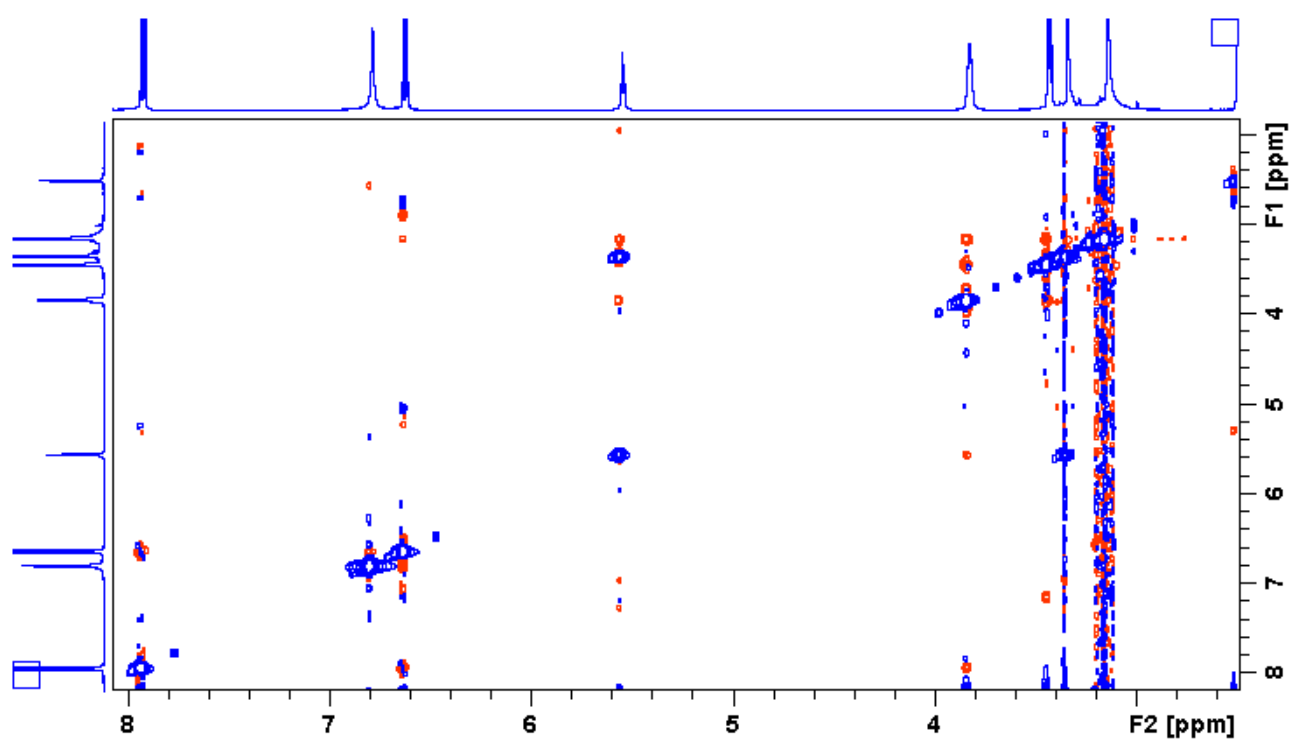

Noesy T<sub>mix</sub> = 400 ms

**Figure S32.**  $^1\text{H}$ -NMR – DES<sub>6</sub>

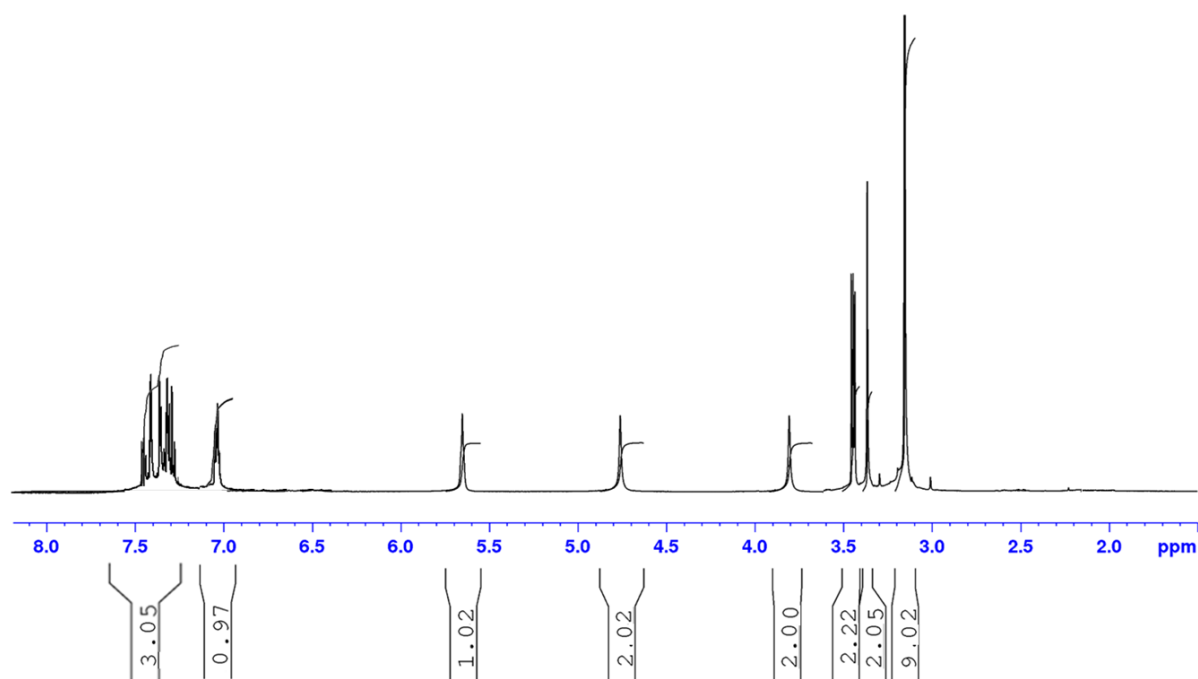

**Figure S33.**  $^{13}\text{C}$ -NMR- DES<sub>6</sub>

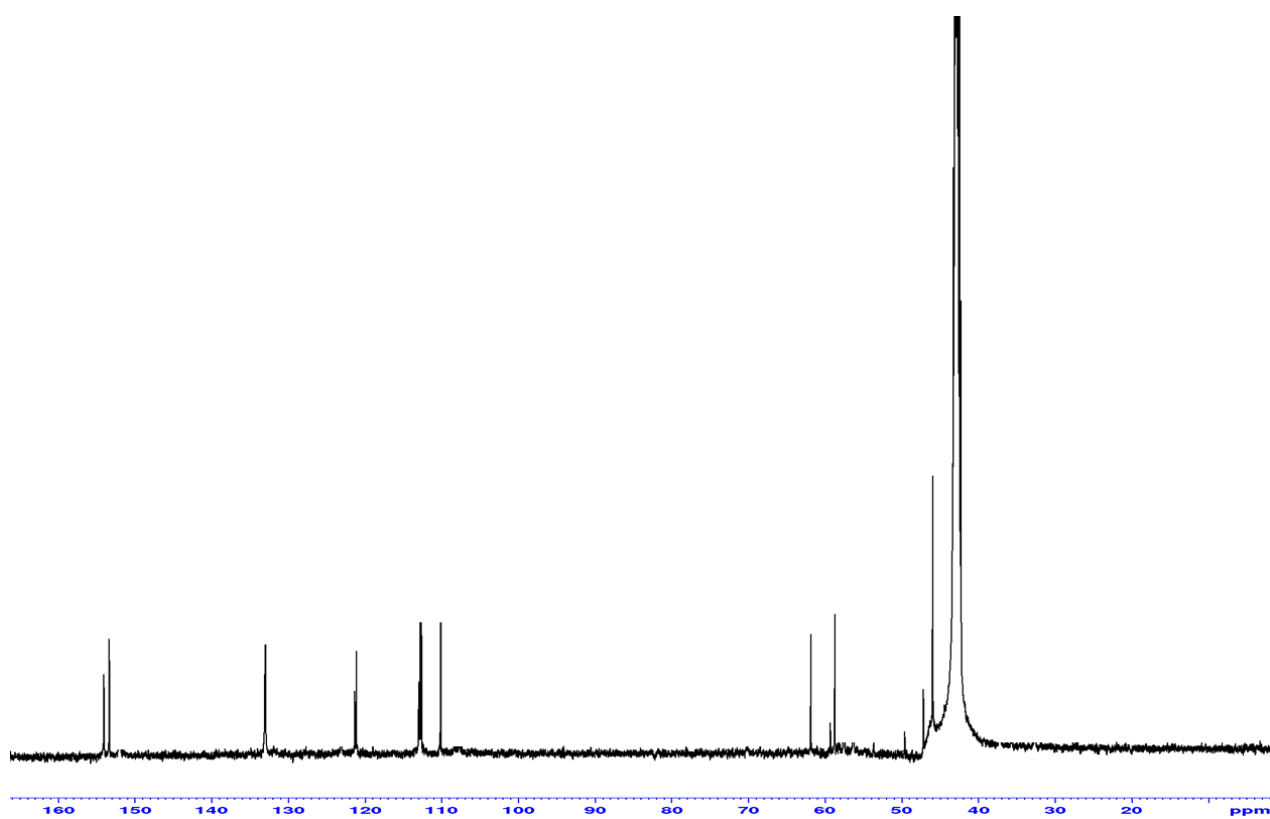

**Figure S34.** NOESY- DES<sub>6</sub>

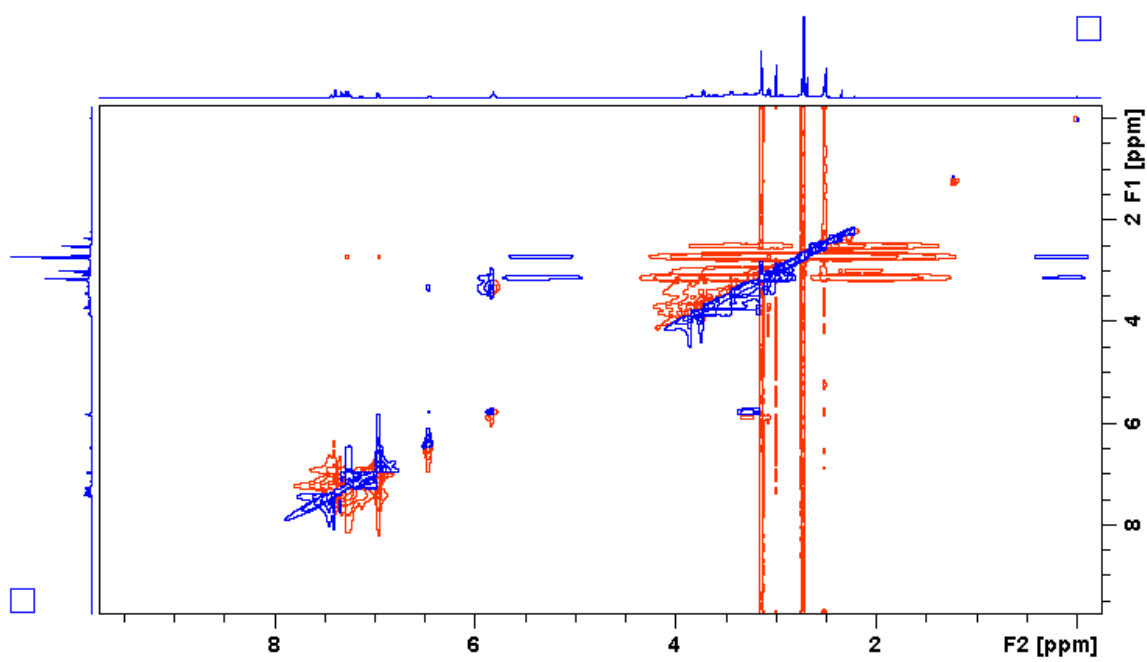

D8 =900 ms

**Figure S35.** <sup>1</sup>H-NMR – DES<sub>7</sub>

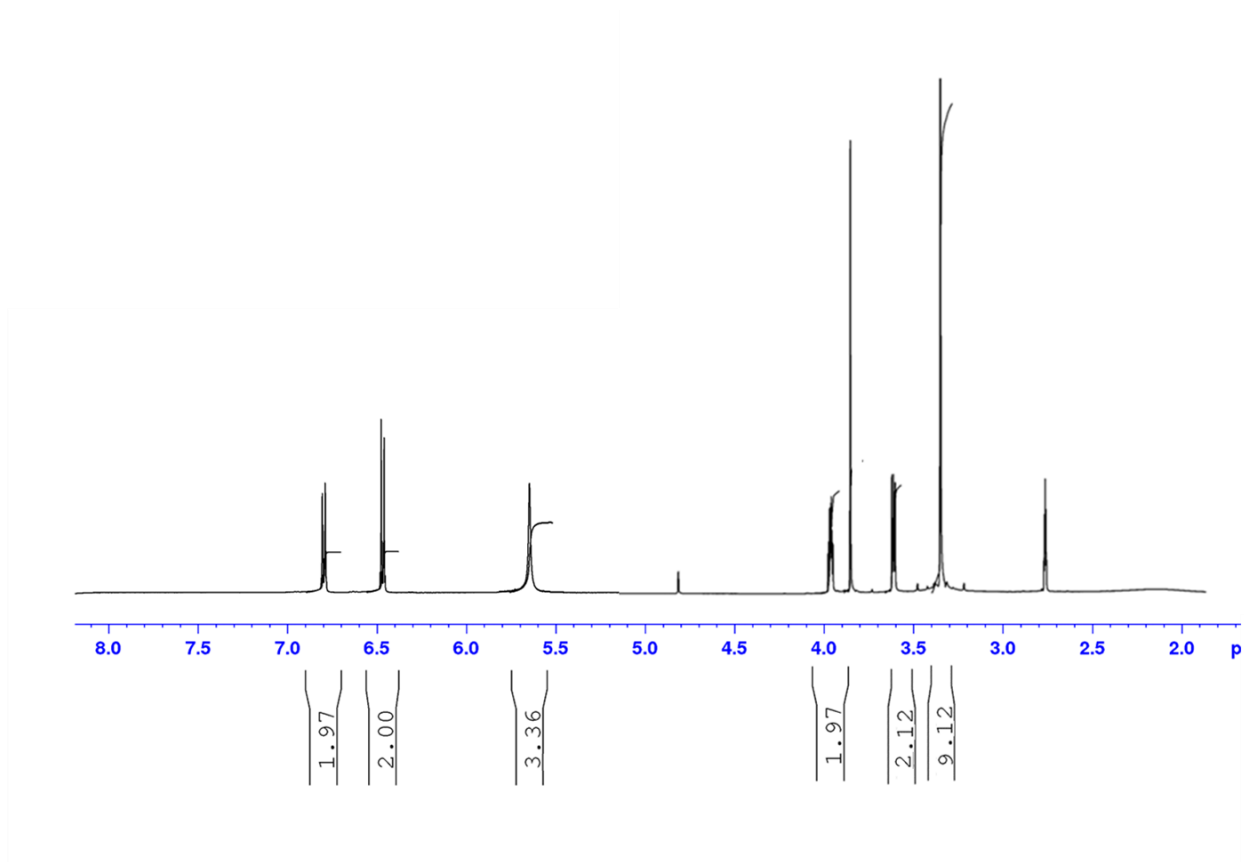

**Figure S36.**  $^{13}\text{C}$ -NMR- DES<sub>7</sub>

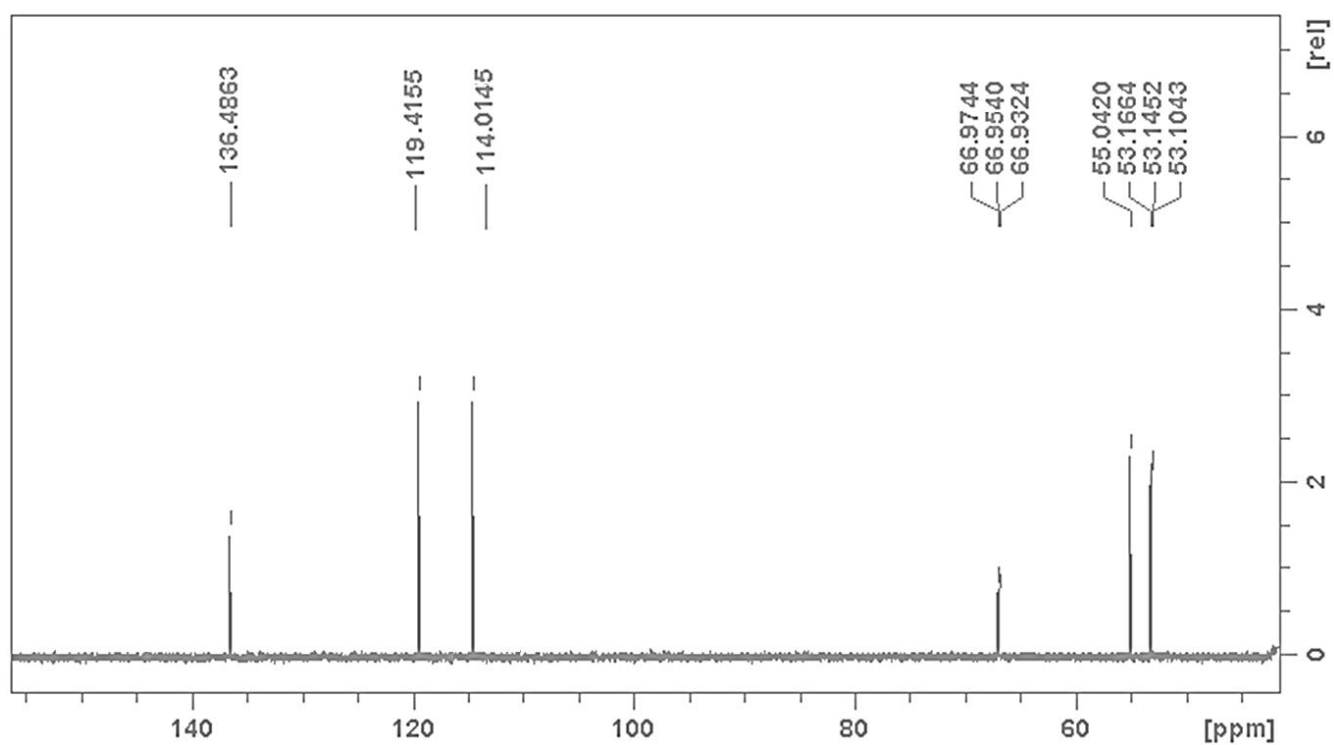

**Figure S37.** NOESY- DES<sub>7</sub>

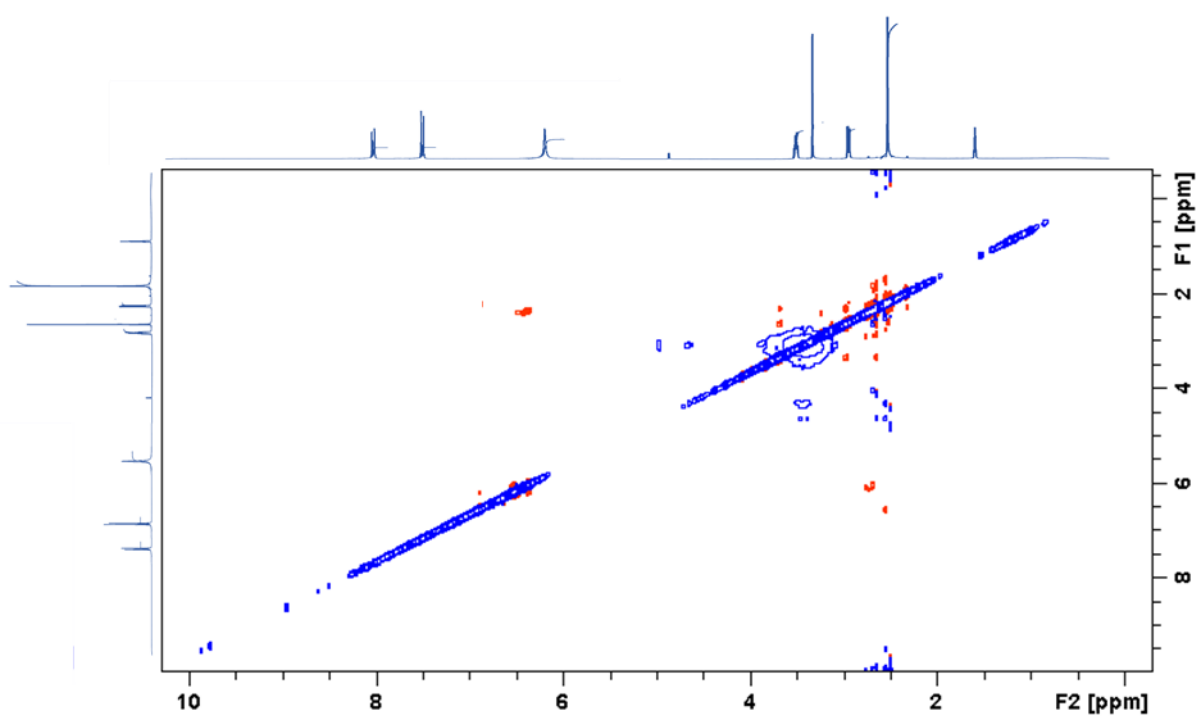

D8 = 900 ms

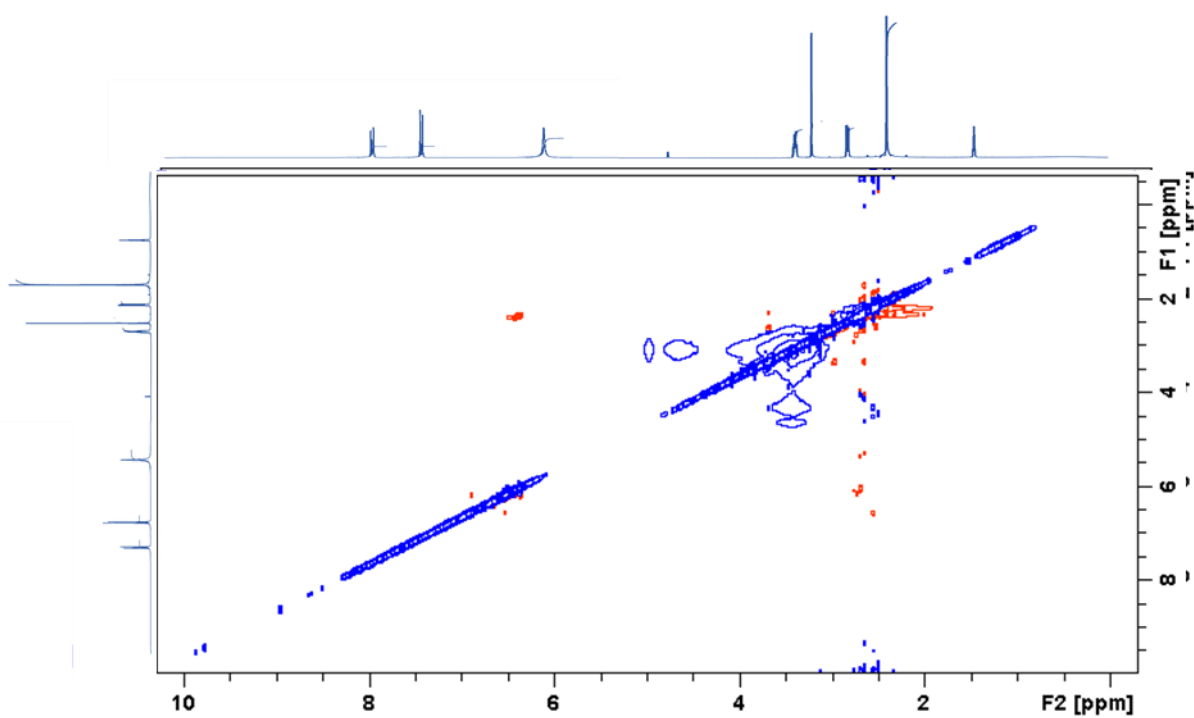

D8 = 700 ms

**Figure S38.**  $^1\text{H}$ -NMR – DES<sub>8</sub>

campione sali di DES 8 in DMSO T= 305 K 25Luglio 2022

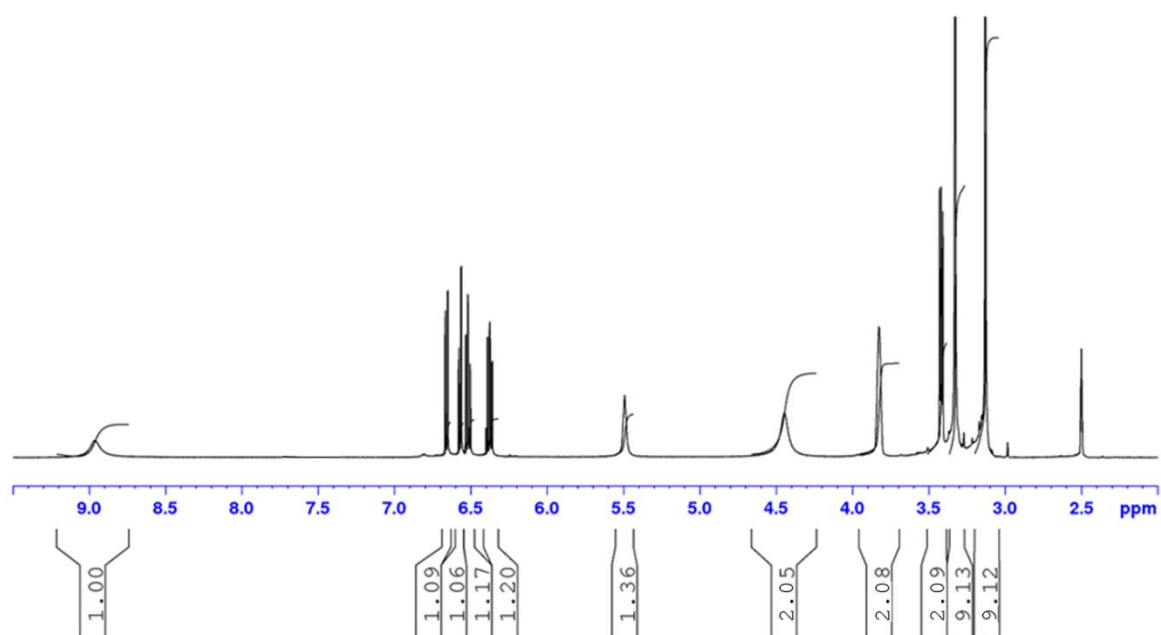

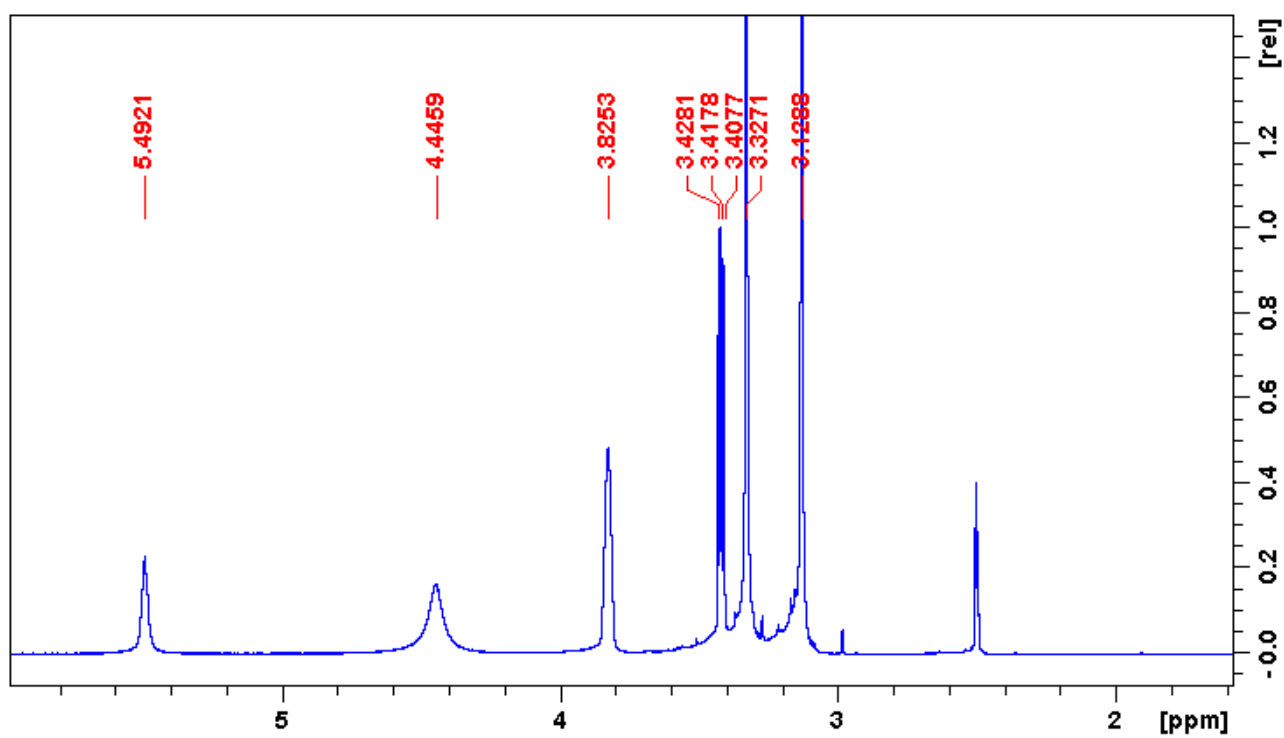

Figure S39. <sup>13</sup>C-NMR- DES<sub>8</sub>

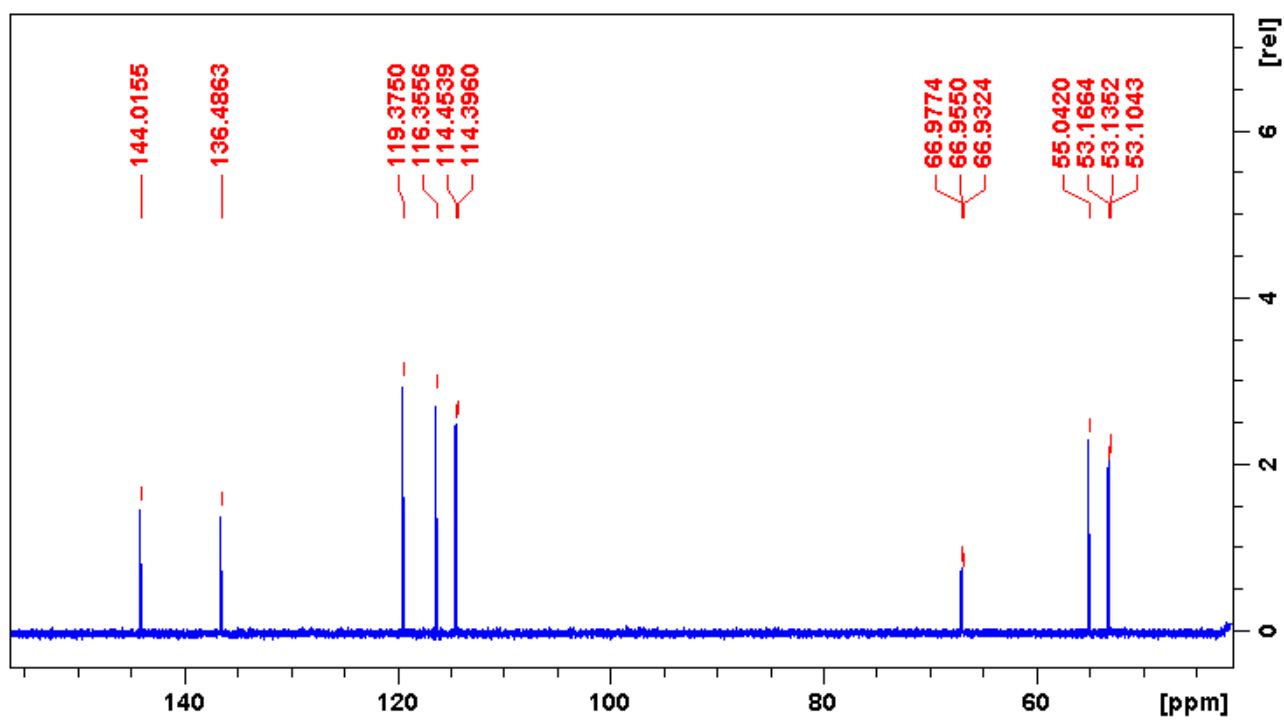

**Figure S40.** NOESY- DES<sub>8</sub>

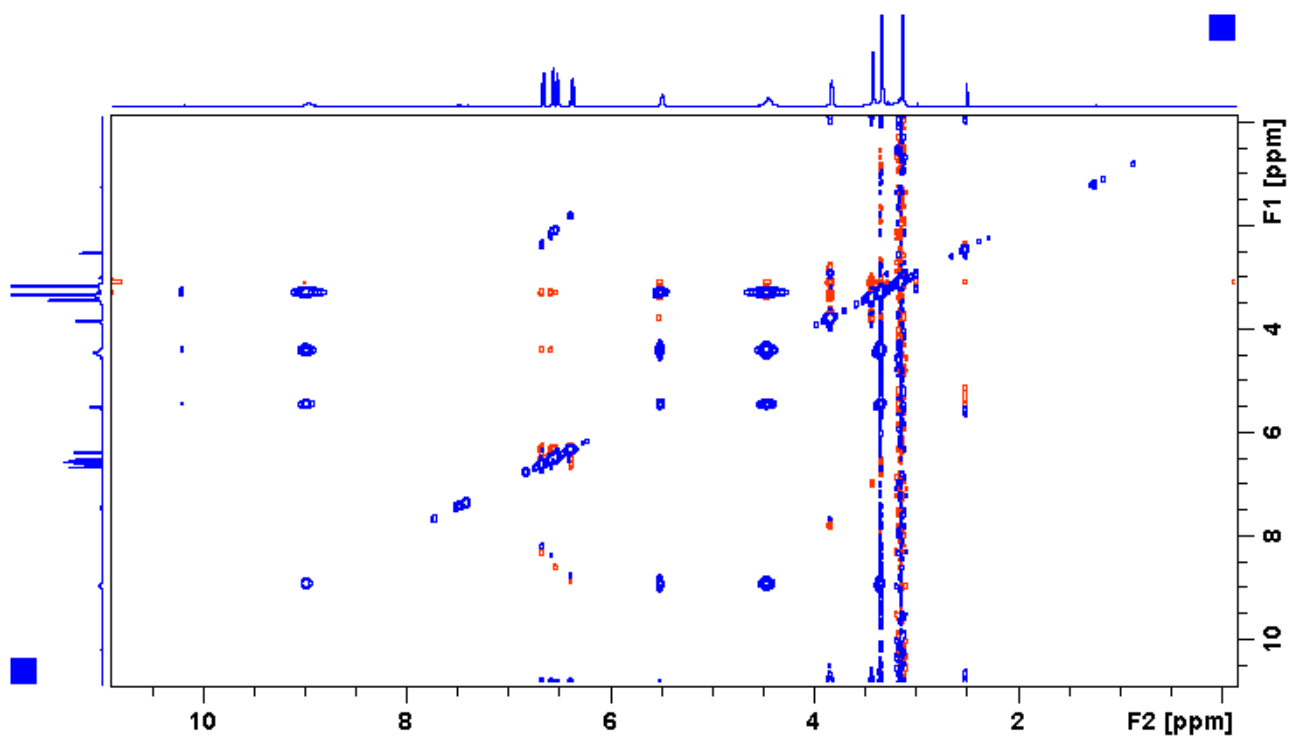

Noesy Tmix = 900 ms

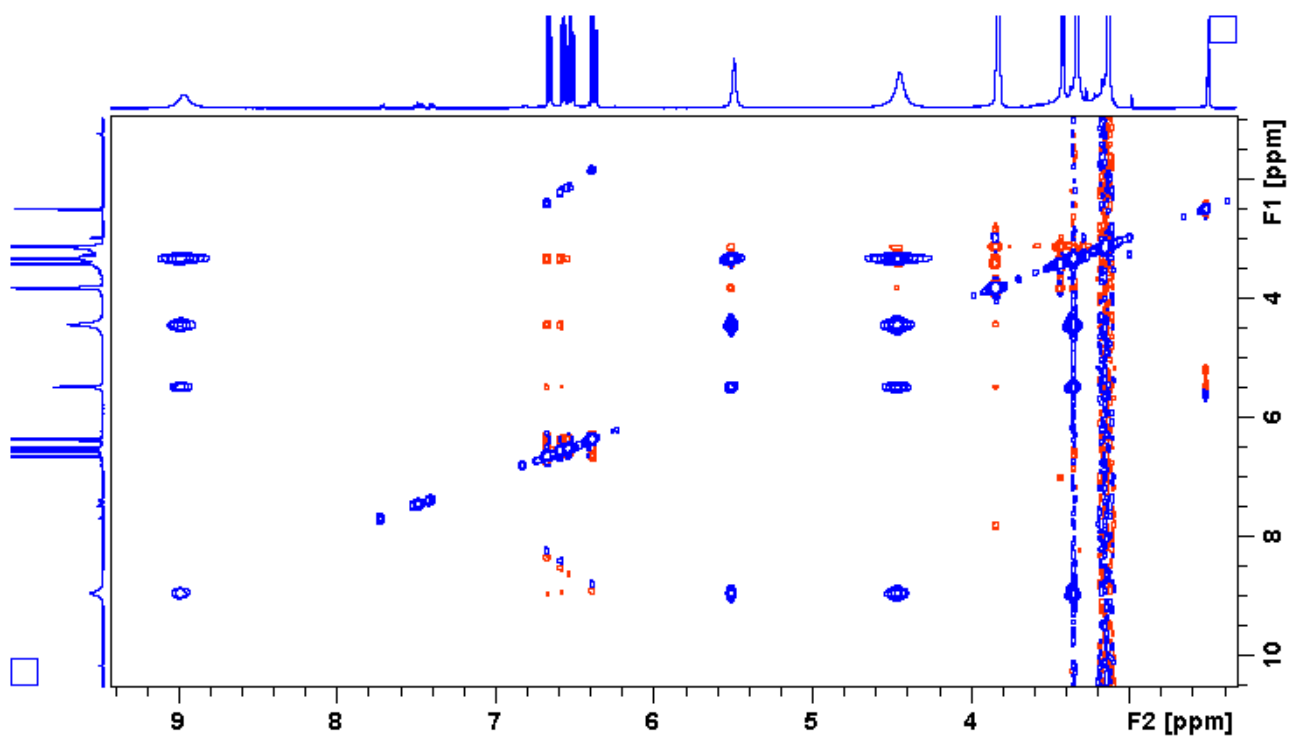

Noesy Tmix = 1.2 s



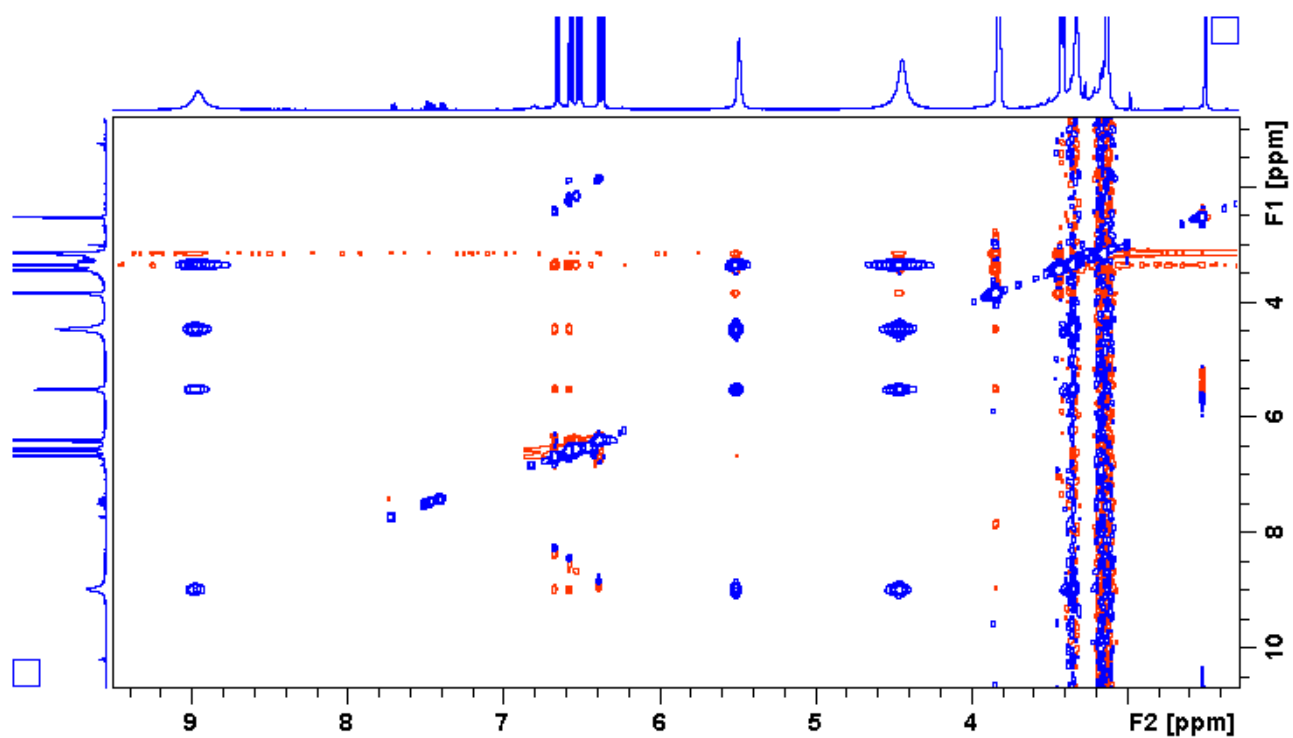

Noesy Tmix = 1.5 s

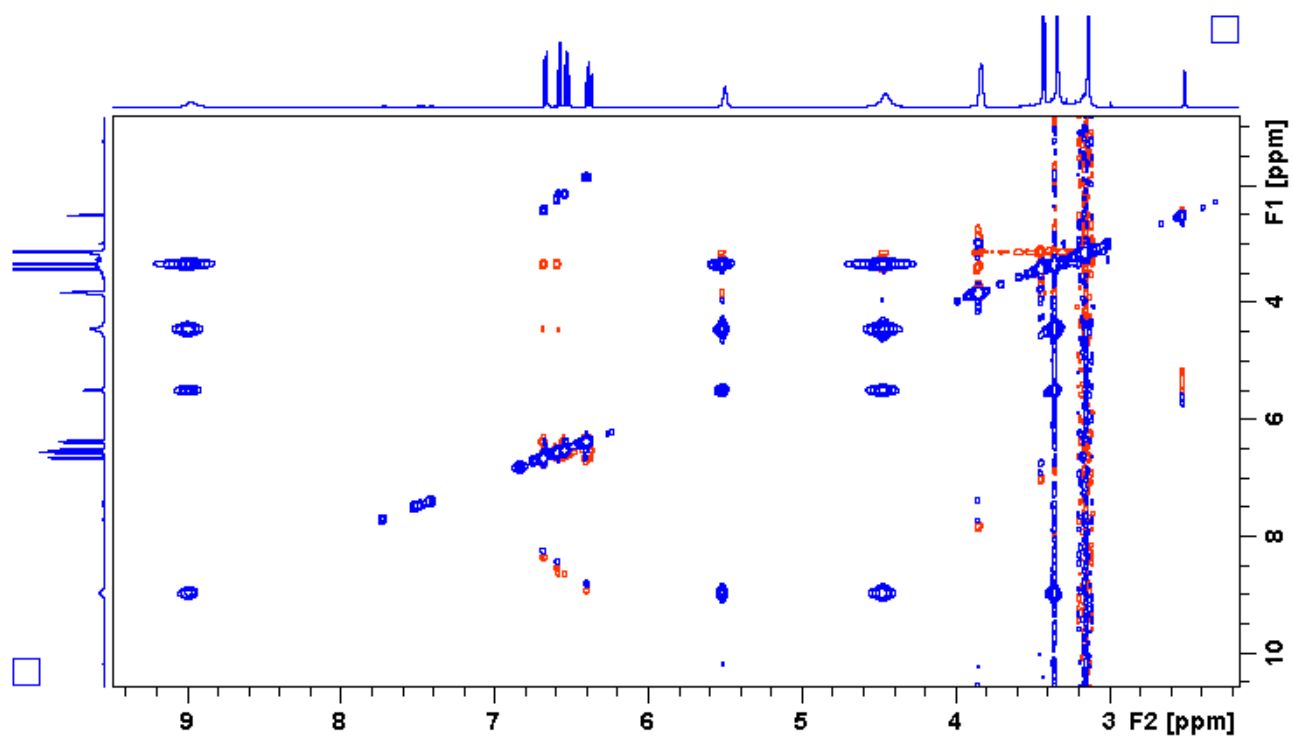

Noesy Tmix= 500 ms

**Figure S41.**  $^1\text{H}$ -NMR – DES<sub>9</sub>

campione sali di DES 9 in DMSO T= 305 K 2 Novembre 2022

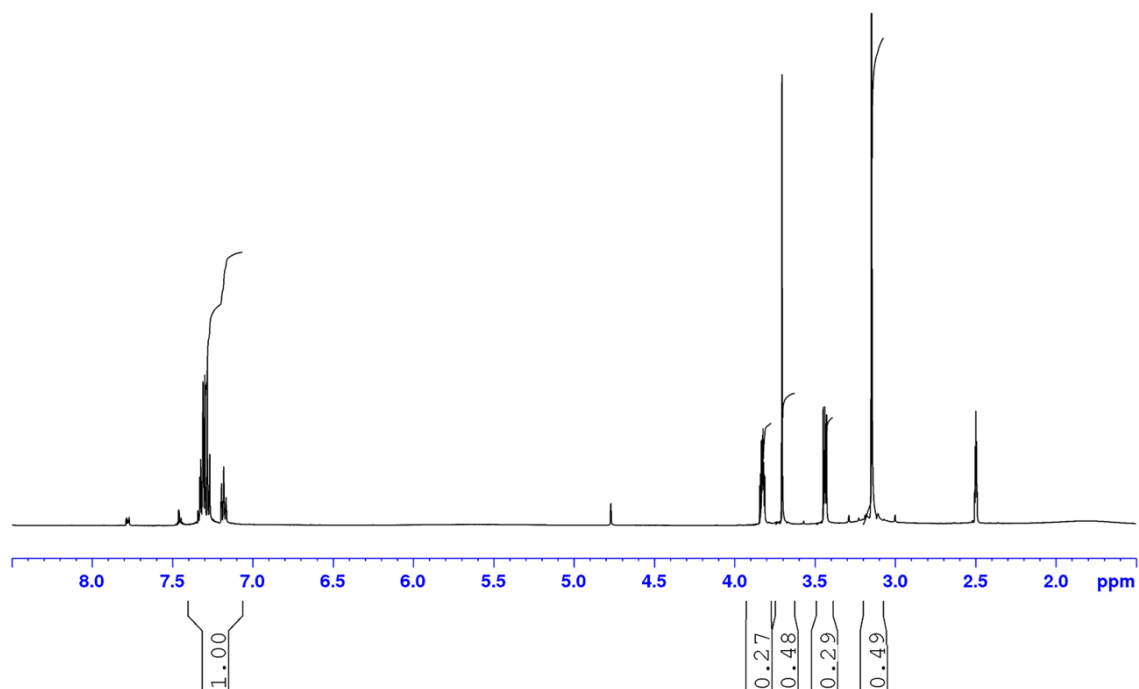

campione sali di DES 9 in DMSO T= 305 K 2 Novembre 2022

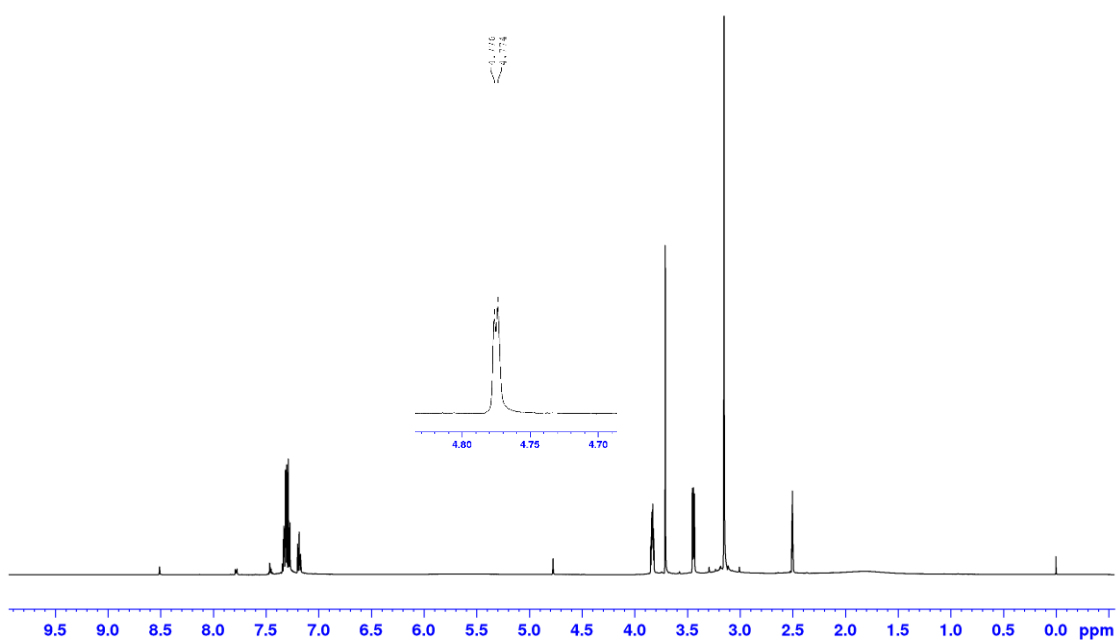

campione sali di DES 9 in DMSO T= 305 K 2 Novembre 2022

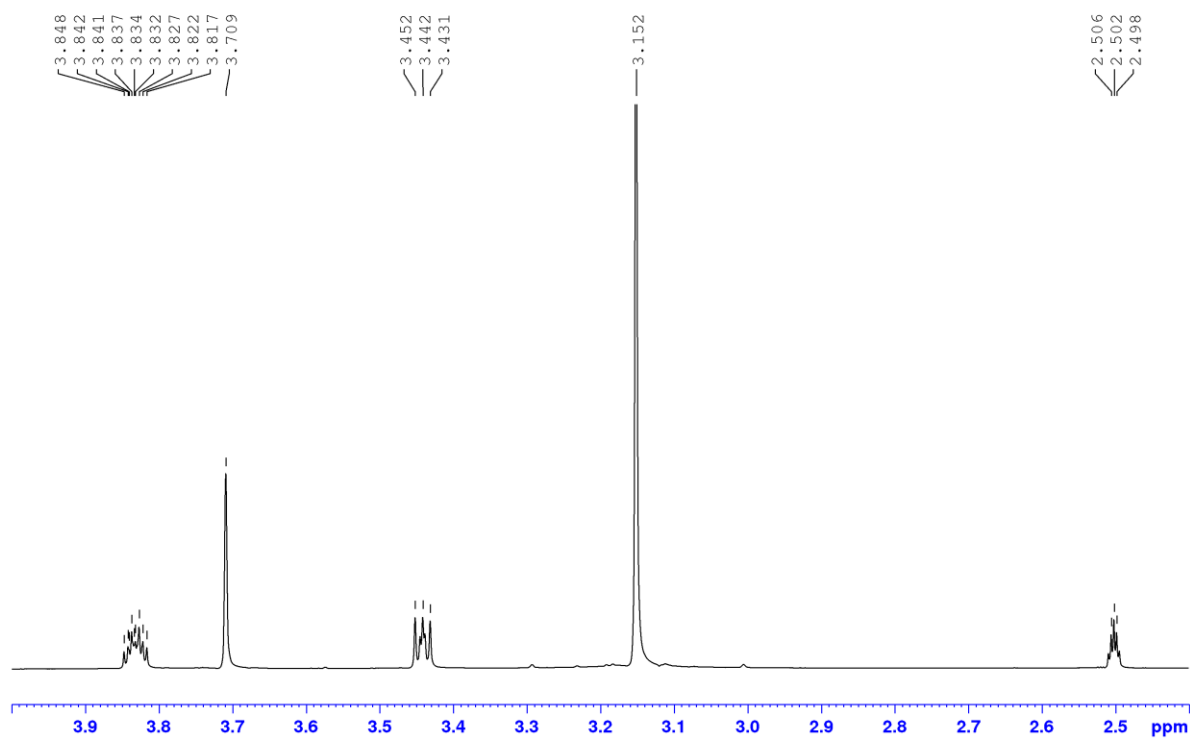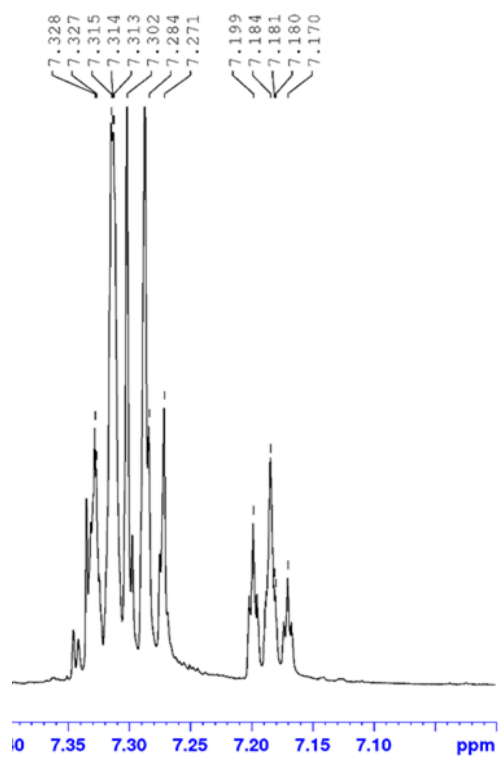

**Figure S42.**  $^{13}\text{C}$ -NMR- DES<sub>9</sub>

spettro  $^{13}\text{C}$  DES9 2 Novembre 2022  
T=305k

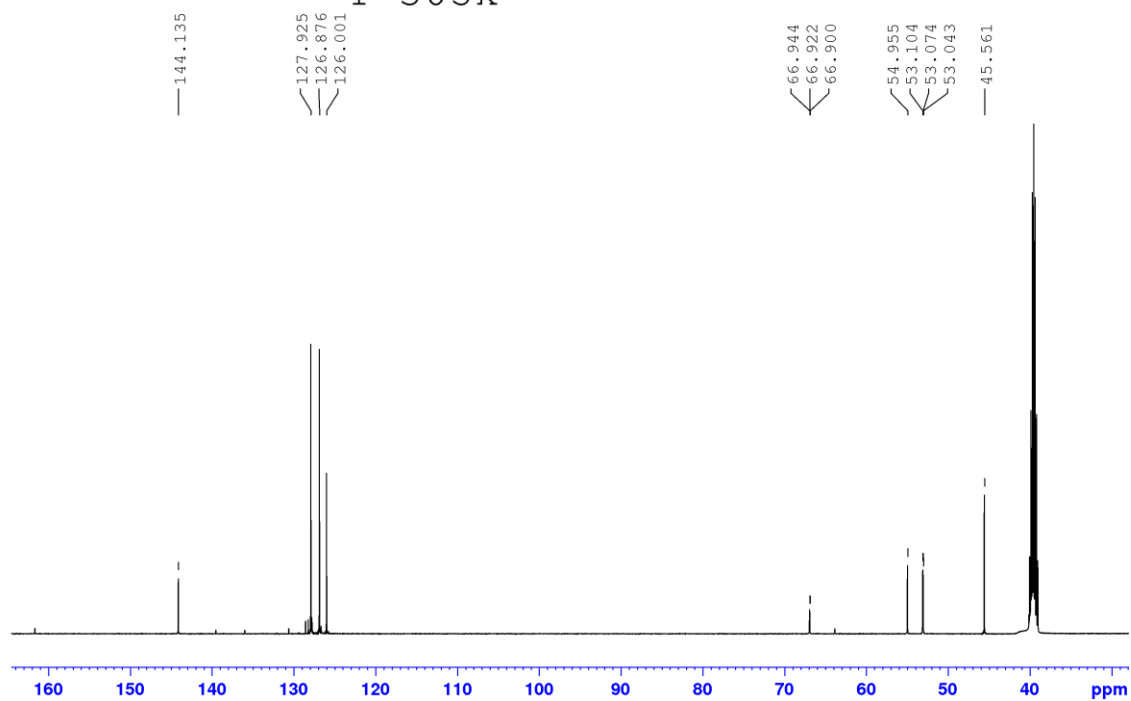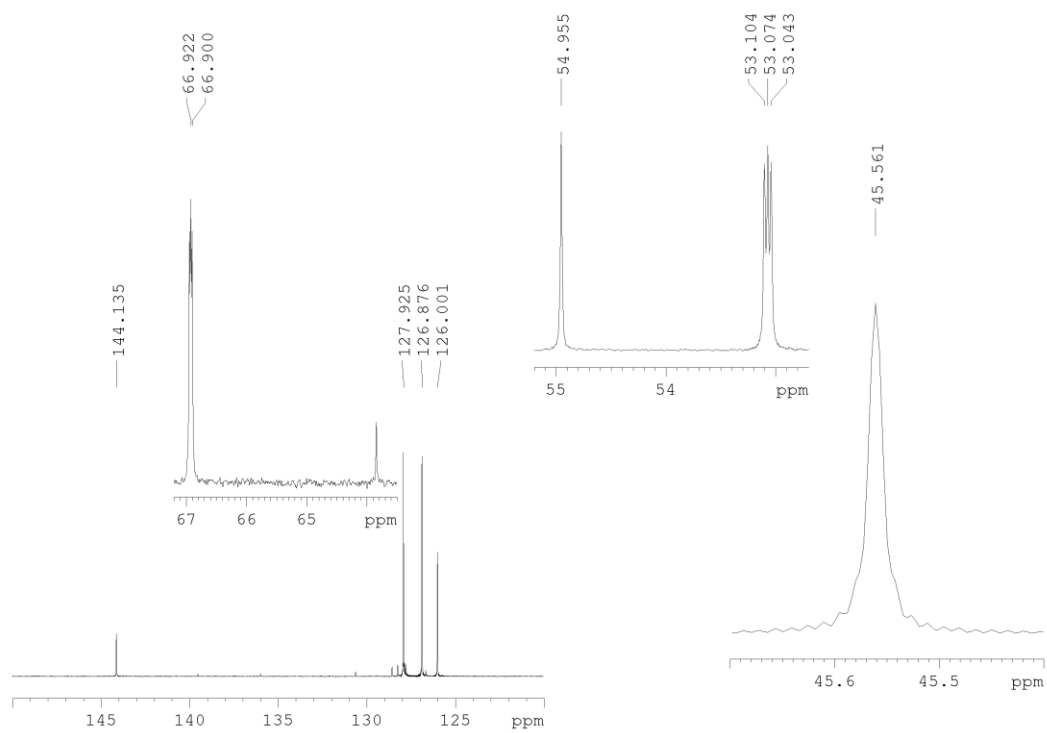

**Figure S43.** NOESY- DES<sub>9</sub>

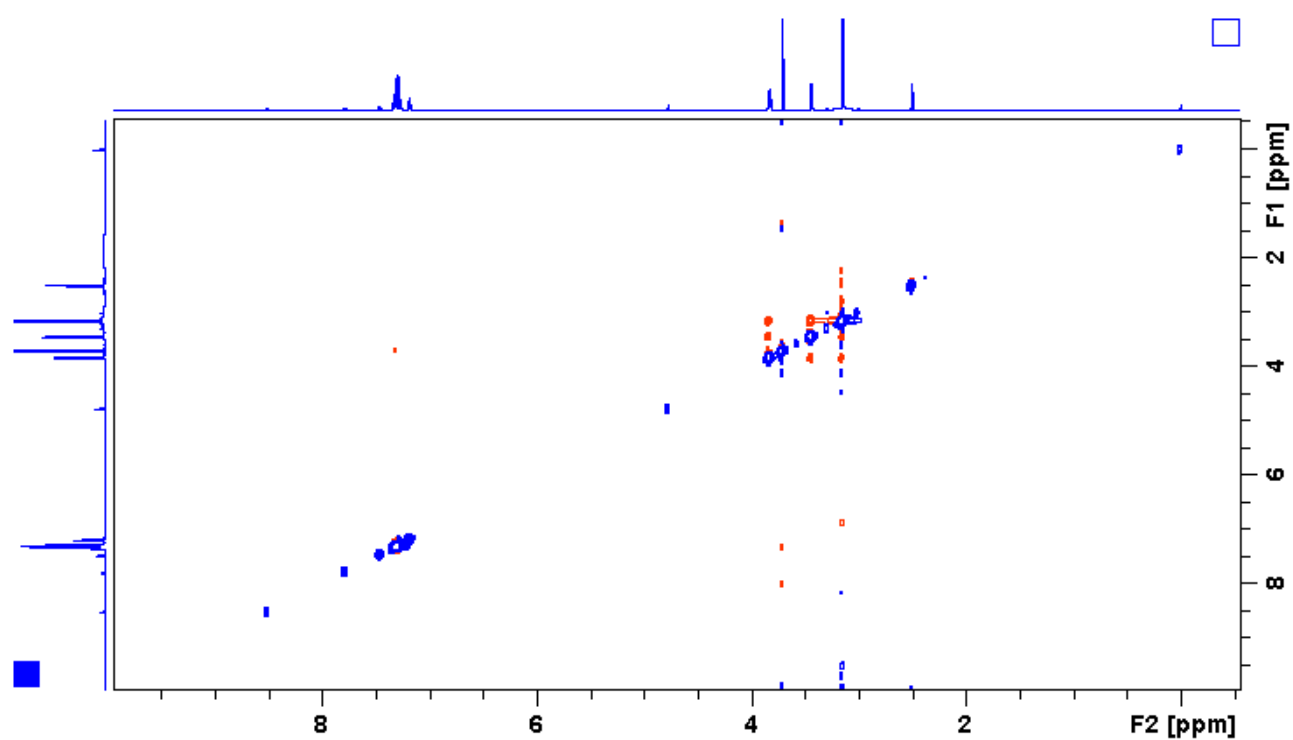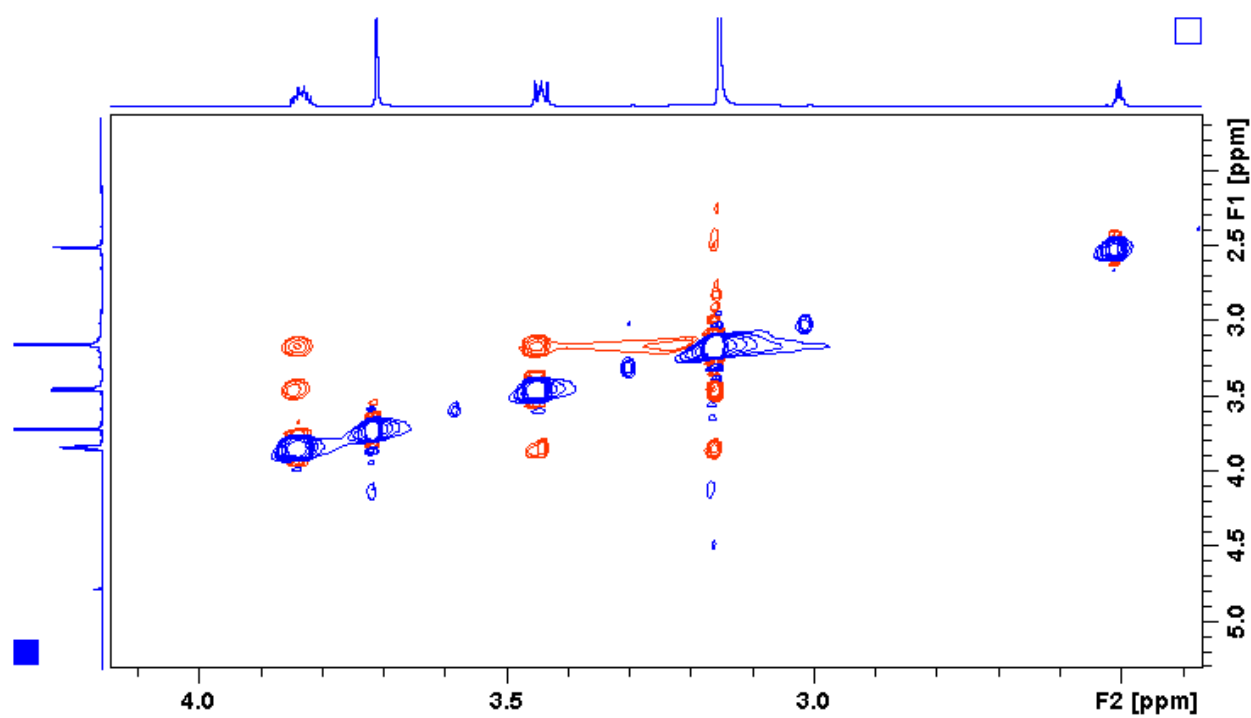

D8 = 900 ms

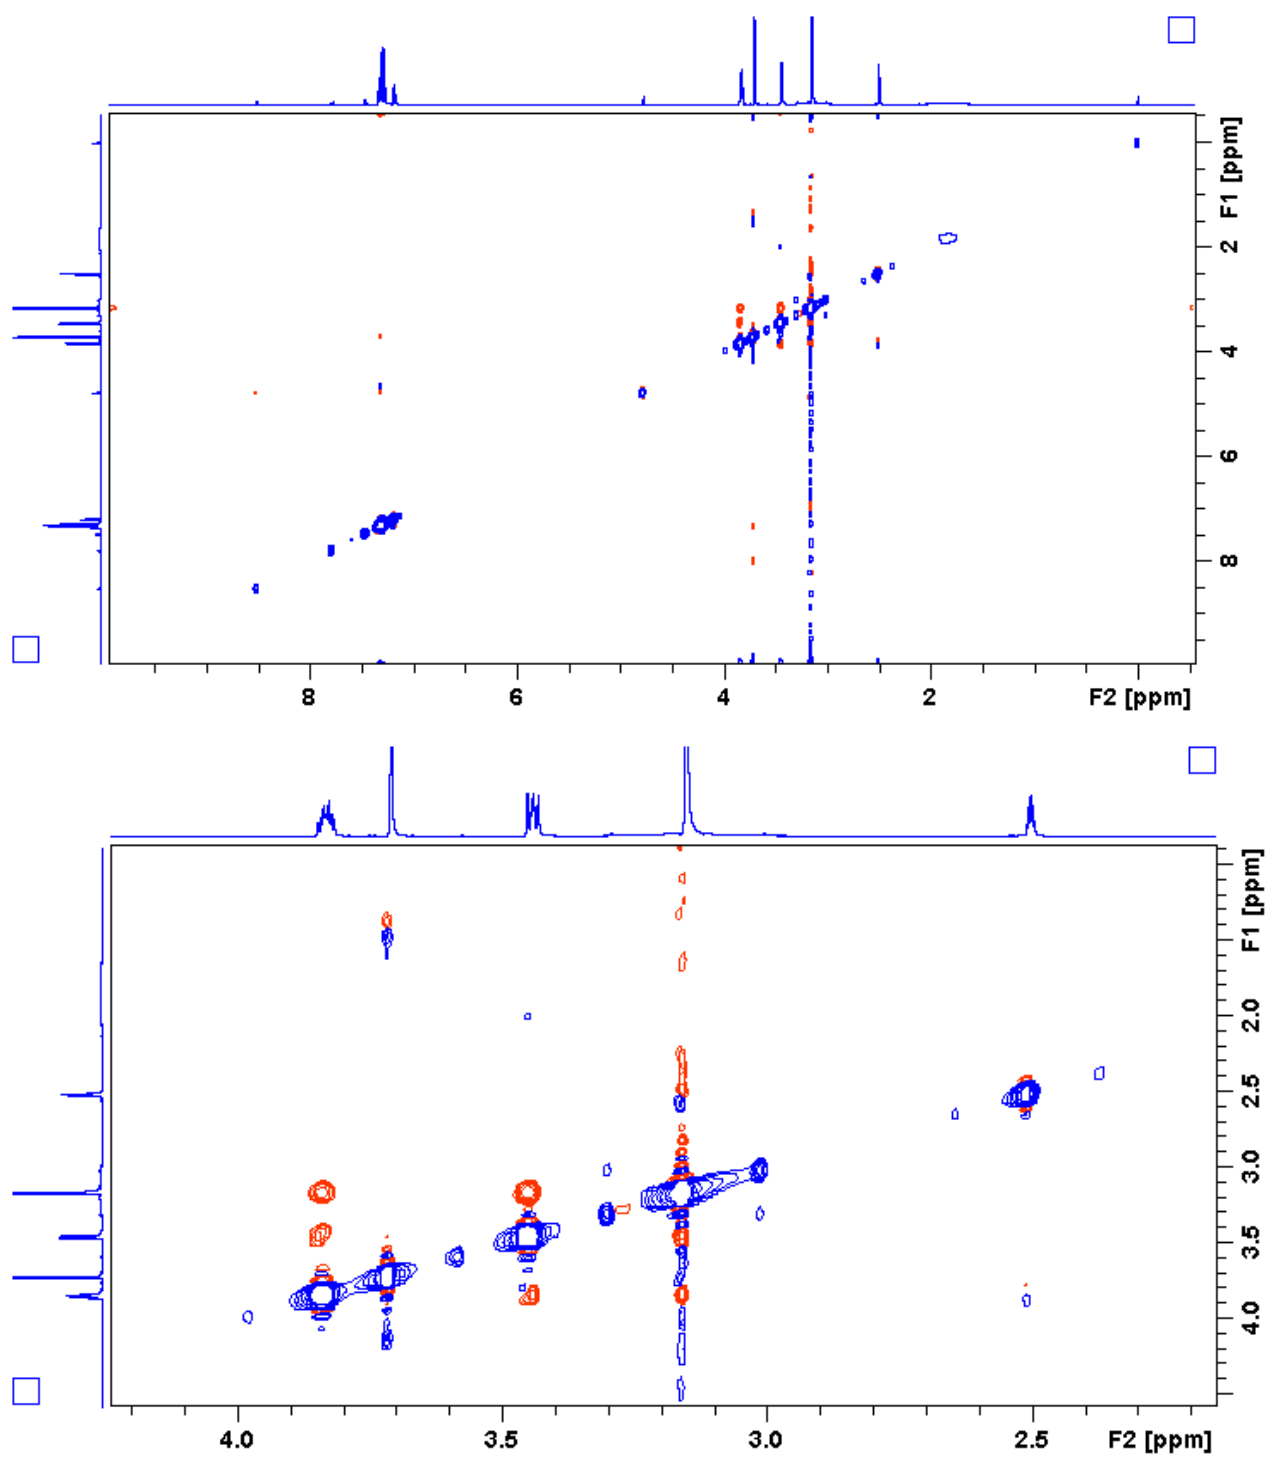

D= 500 ms

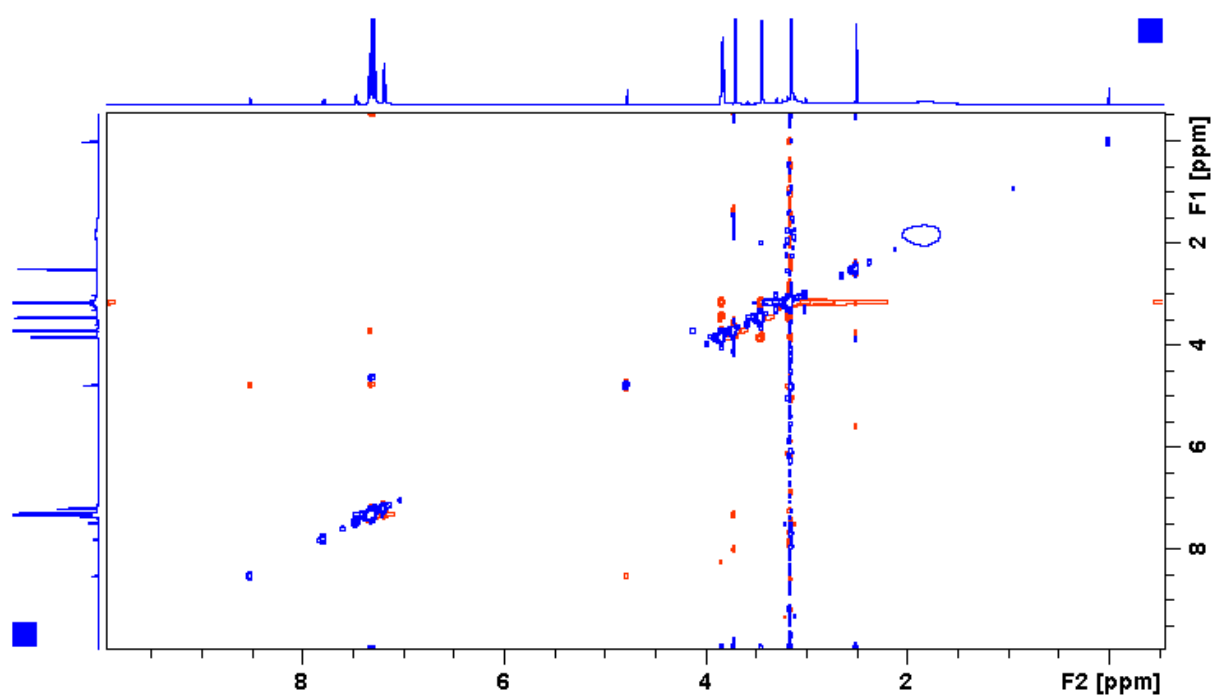

D8 = 700 ms

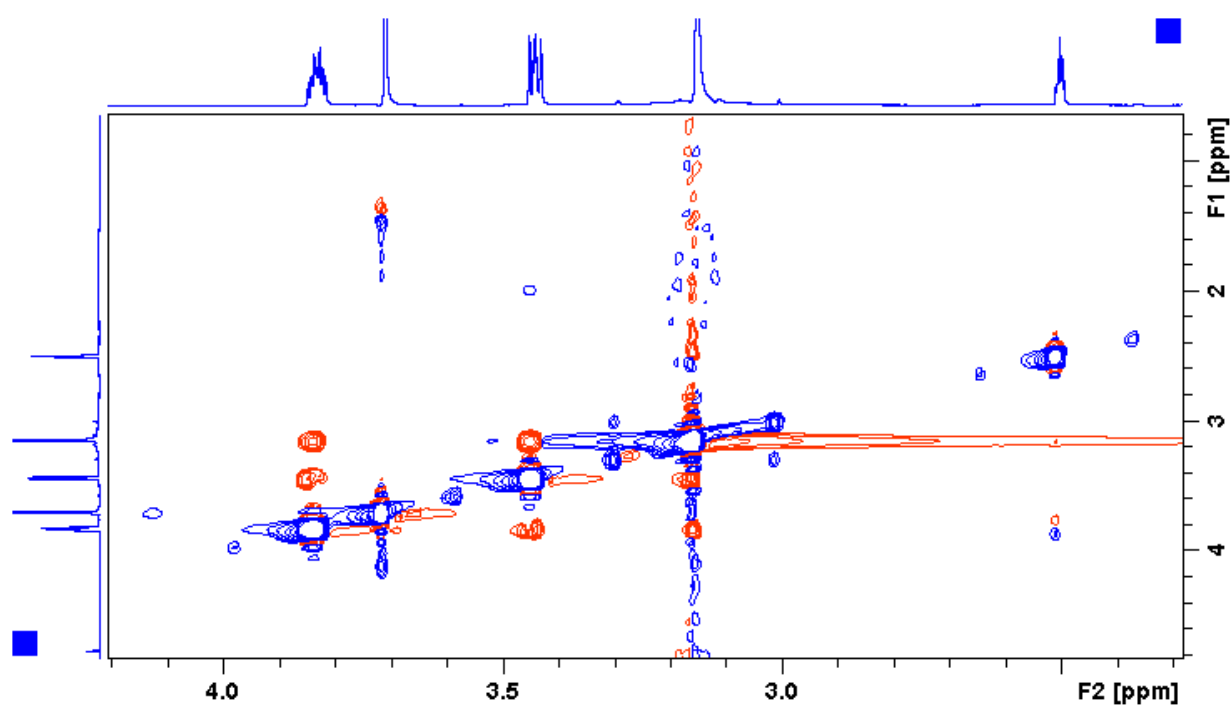

**Figure S44.**  $^1\text{H}$ -NMR – DES<sub>10</sub>

campione sali di DES 10 in DMSO T= 305 K 31 Ottobre 2022

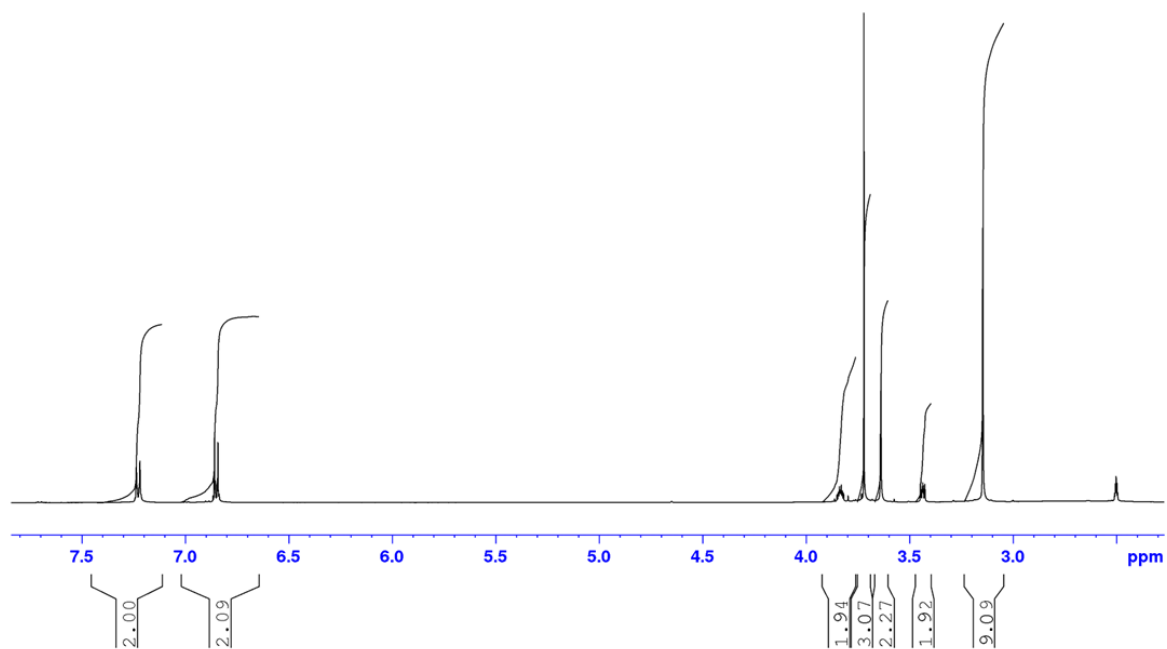

**Figure S45.**  $^{13}\text{C}$ -NMR- DES<sub>10</sub>

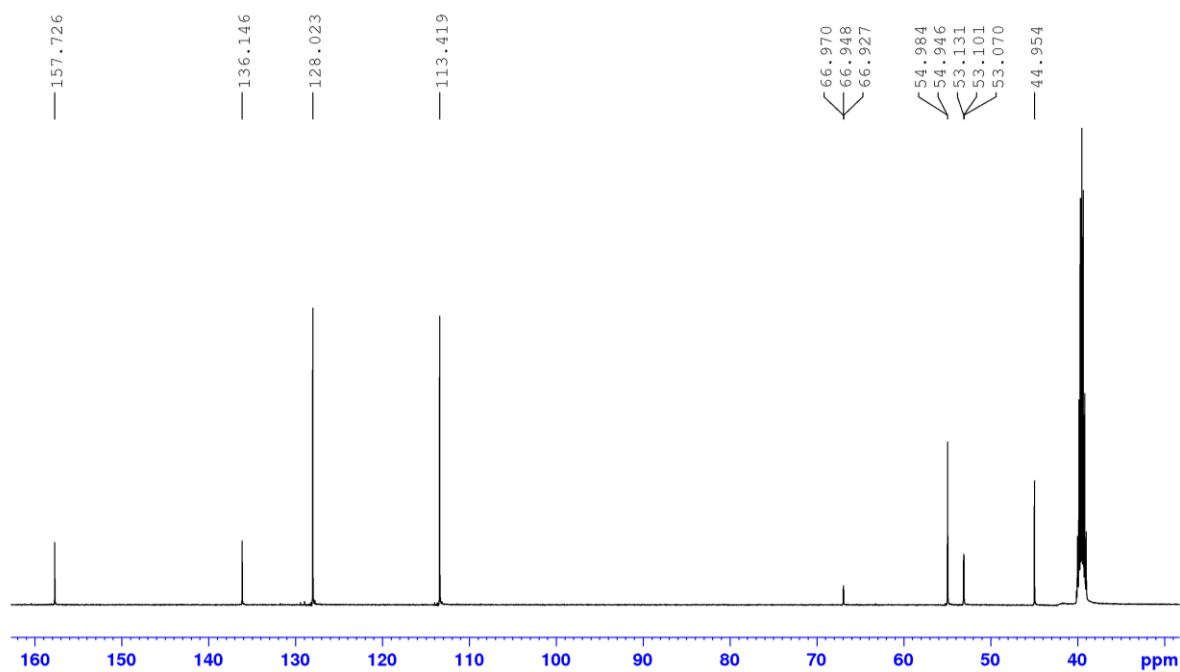



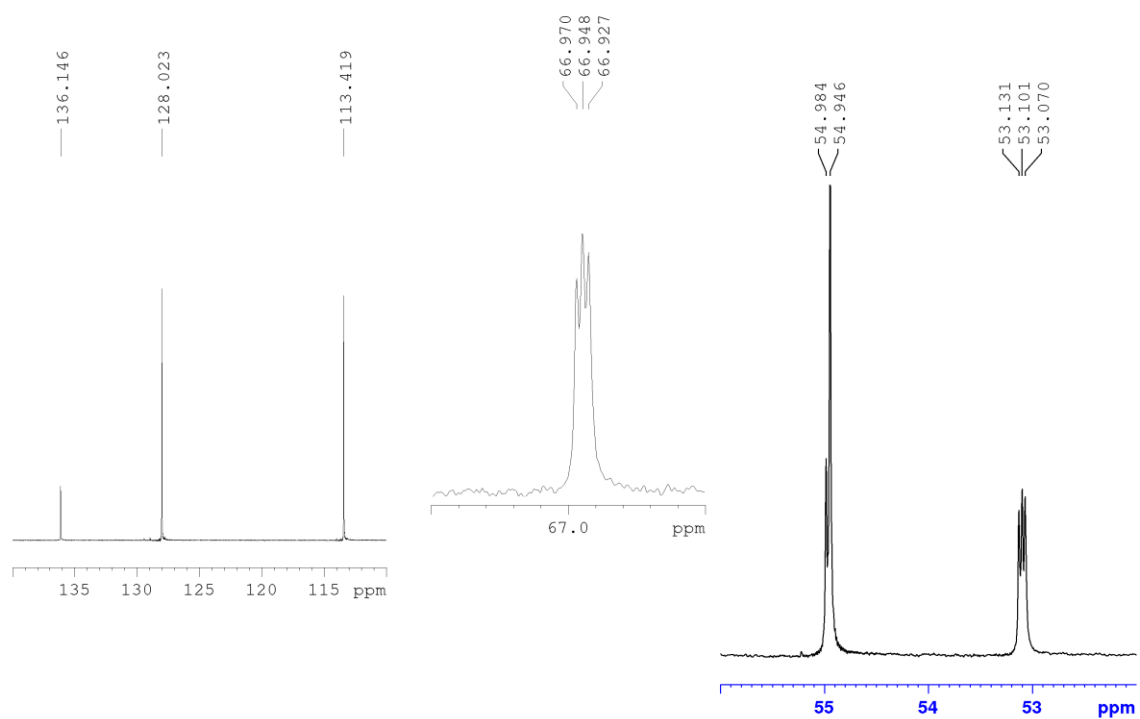

**Figure S46.** NOESY- DES<sub>10</sub>

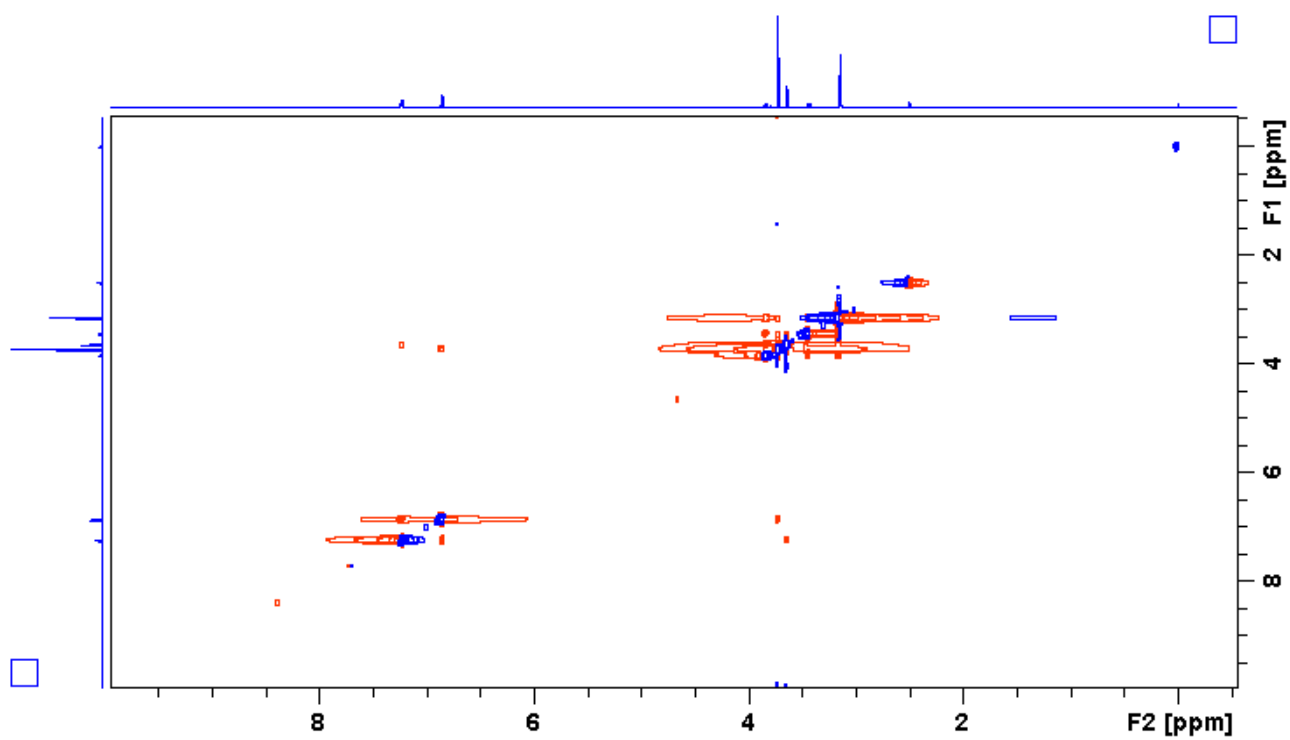

D= 900 ms

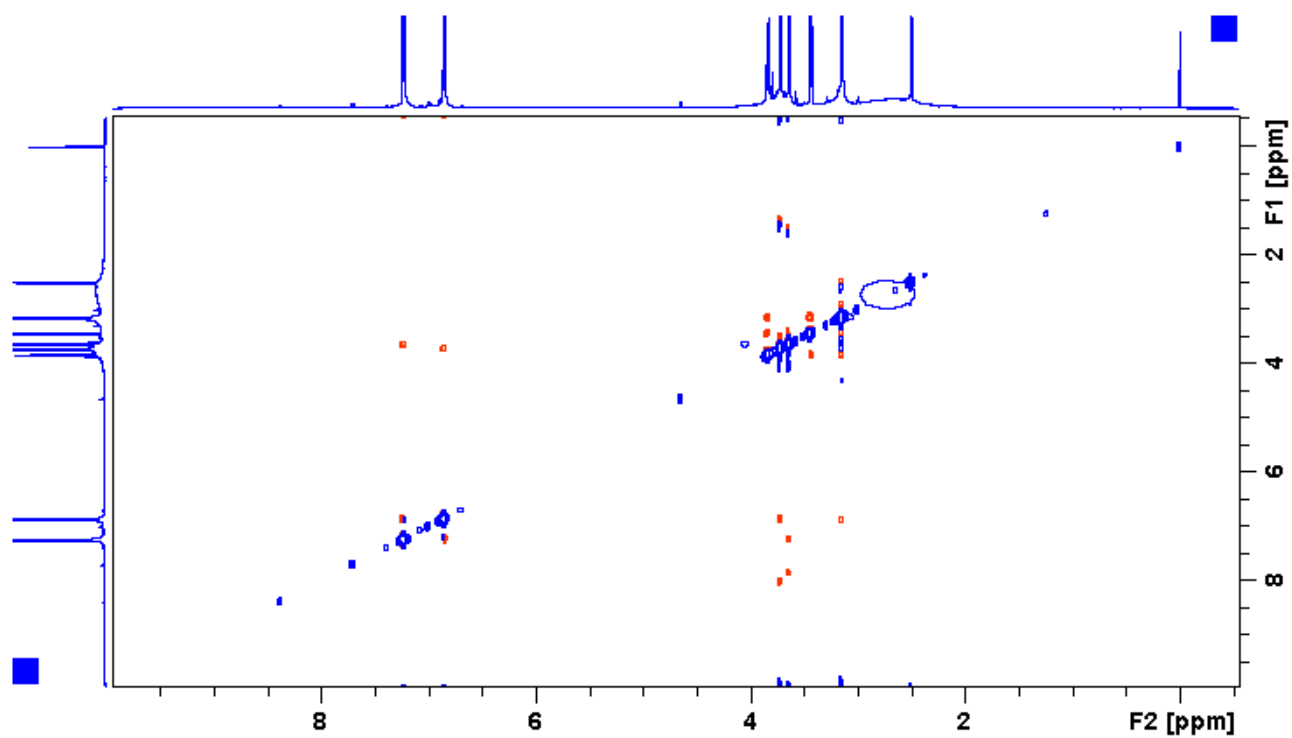

D8 = 500 ms

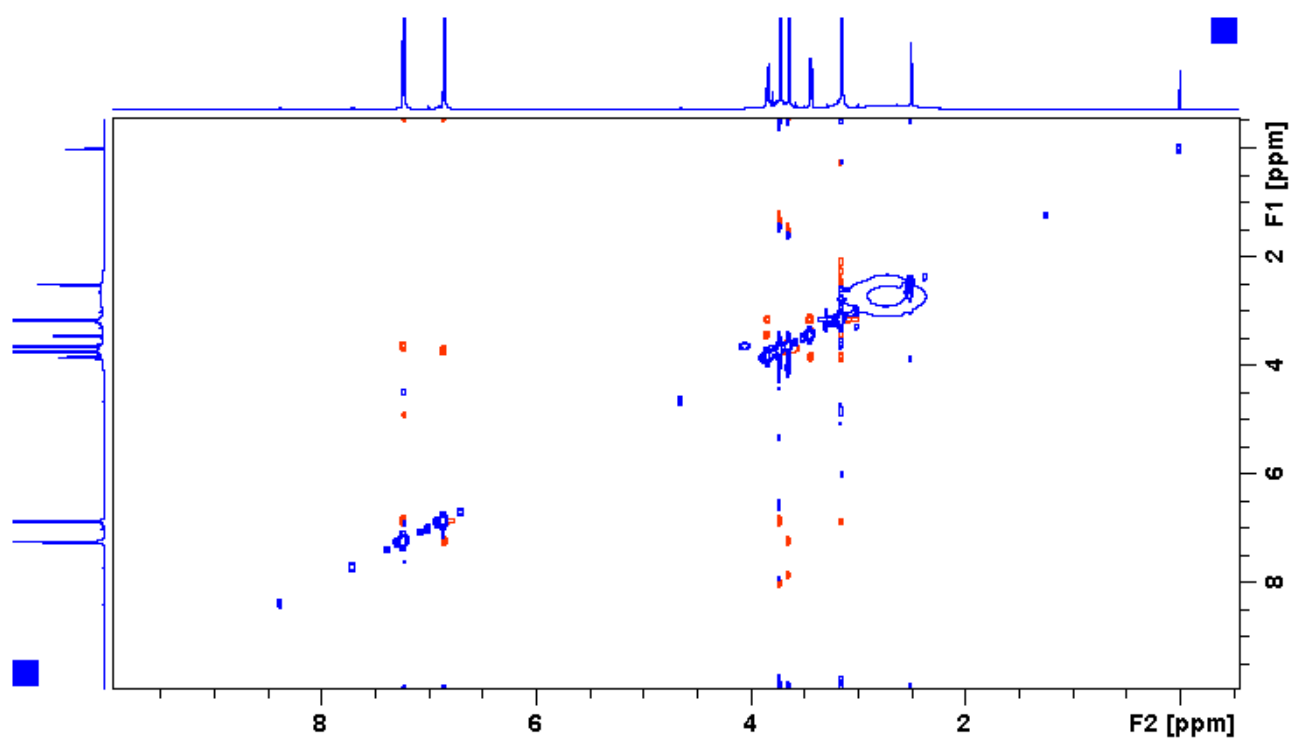

D8 = 700 ms

**Figure S47.**  $^1\text{H}$ -NMR – DES<sub>11</sub>

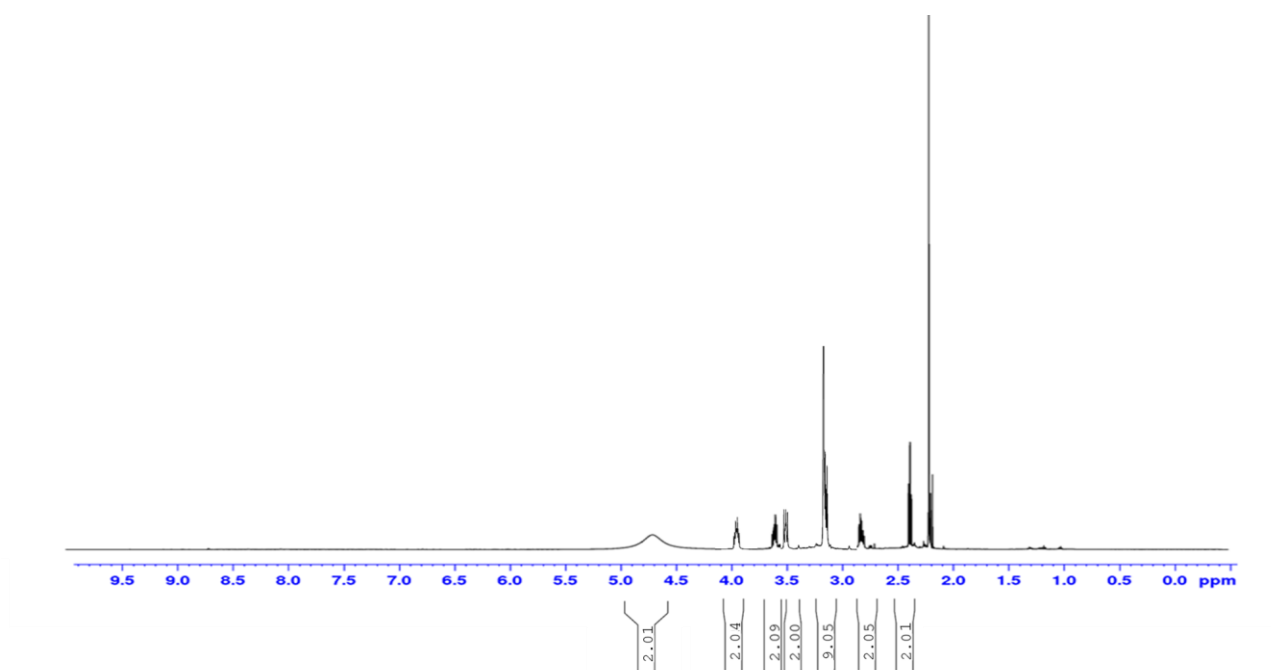

**Figure S48.**  $^{13}\text{C}$ -NMR- DES<sub>11</sub>

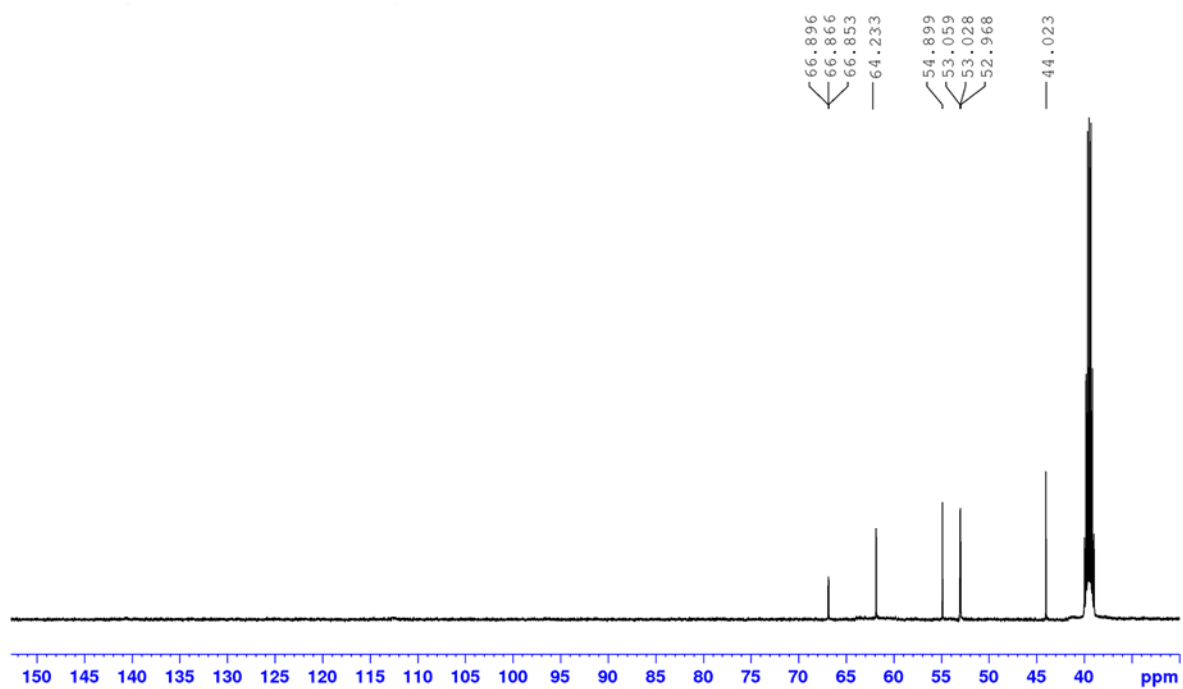

**Figure S49.** NOESY– DES<sub>11</sub>

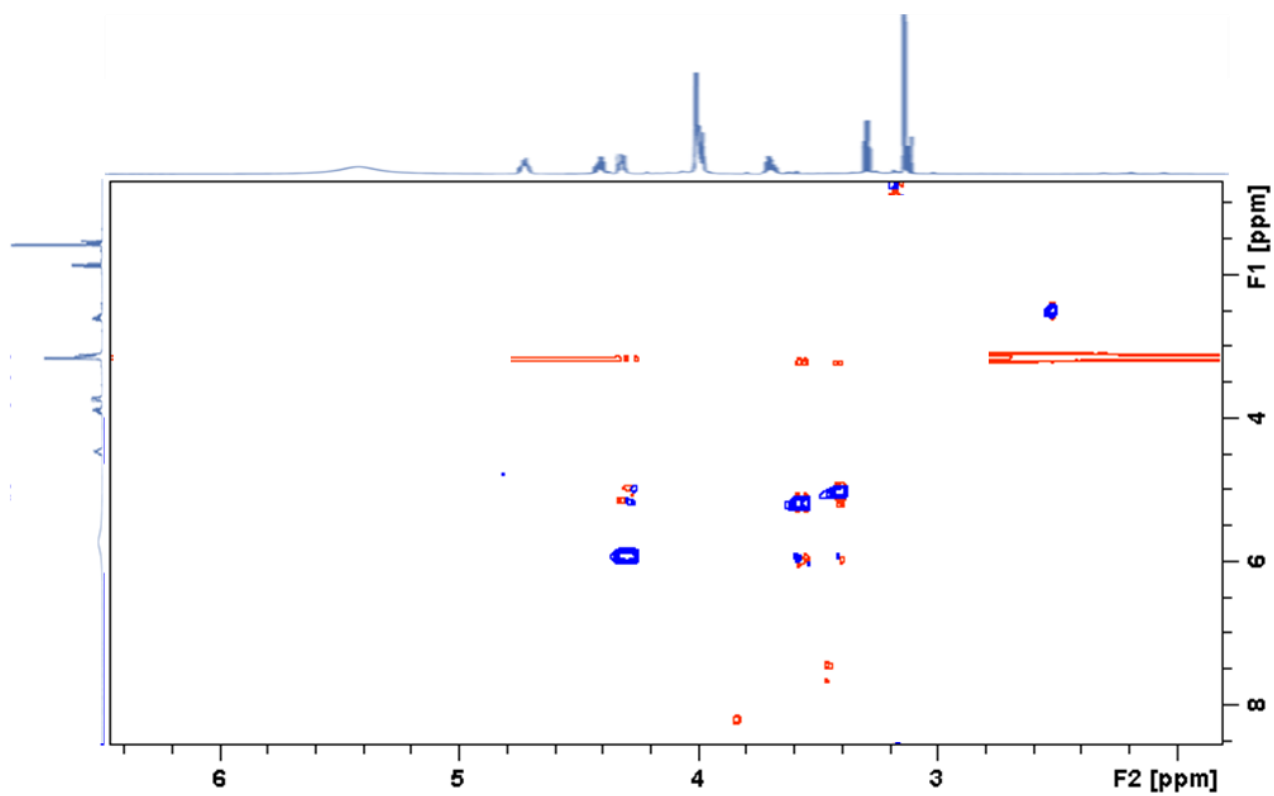

D8= 900 ms

**Figure S50.**  $^1\text{H}$ -NMR – DES<sub>12</sub>

campione sali di DES 12 in DMSO T= 305 K 3 Novembre 2022

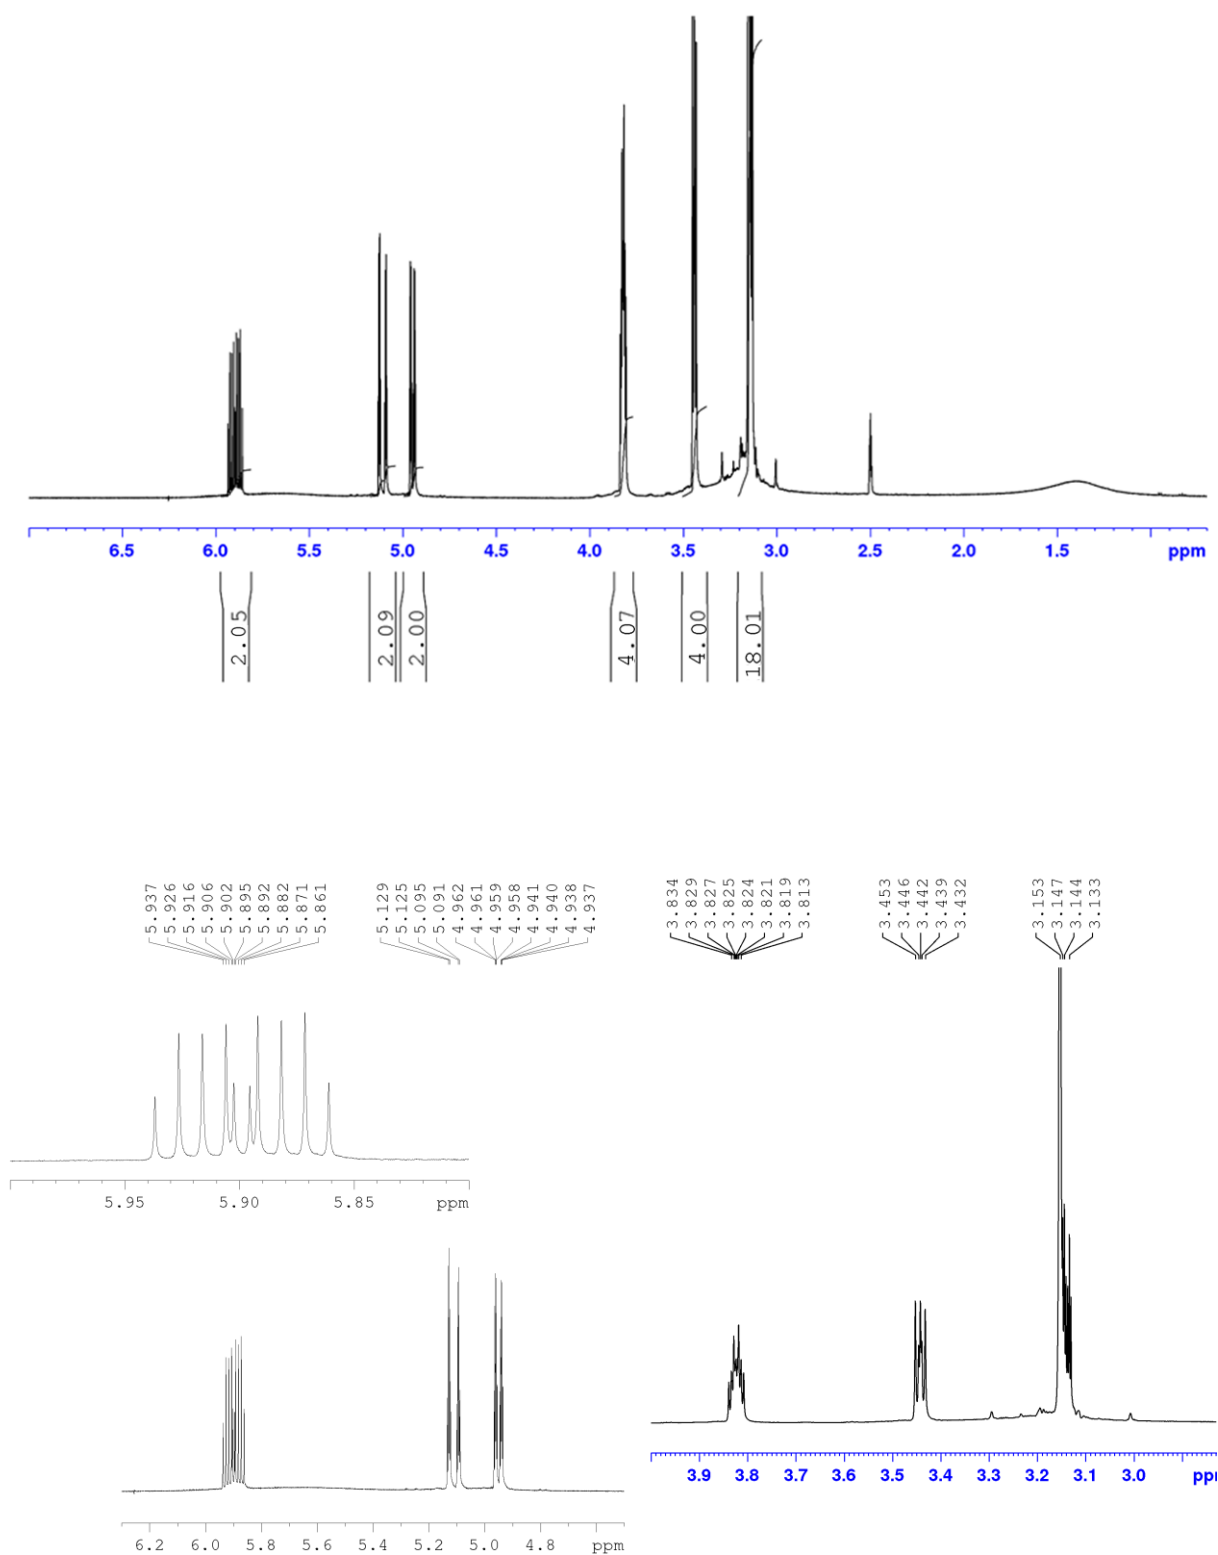

**Figure S51.**  $^{13}\text{C}$ -NMR- DES<sub>12</sub>

spettro  $^{13}\text{C}$  DES12 3 Novembre 2022  
T=305k

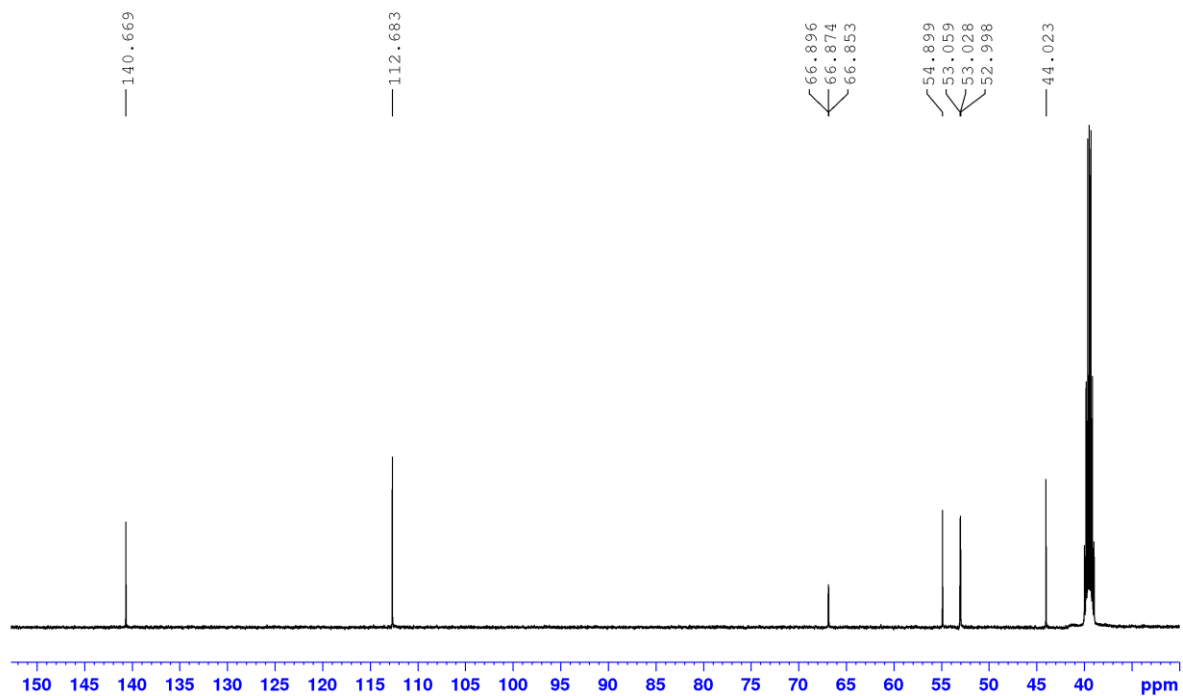

**Figure S52.** NOESY- DES<sub>12</sub>

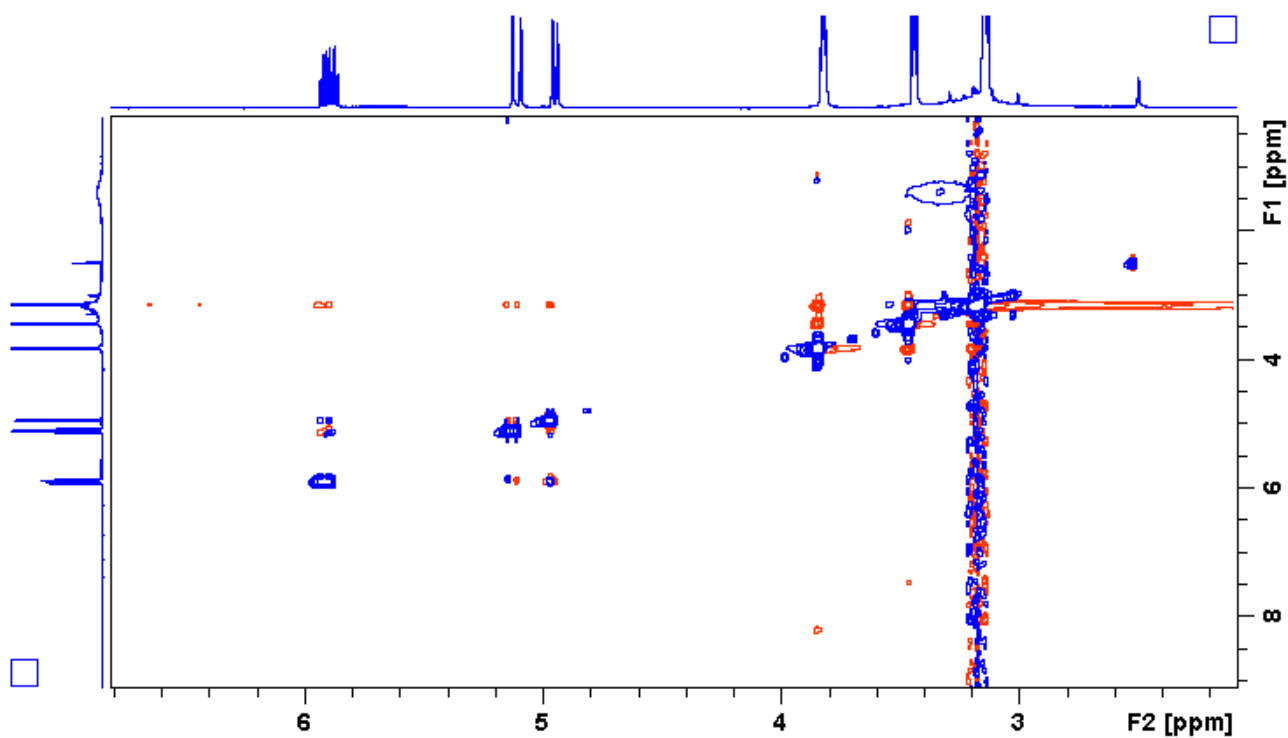

D8= 900 ms

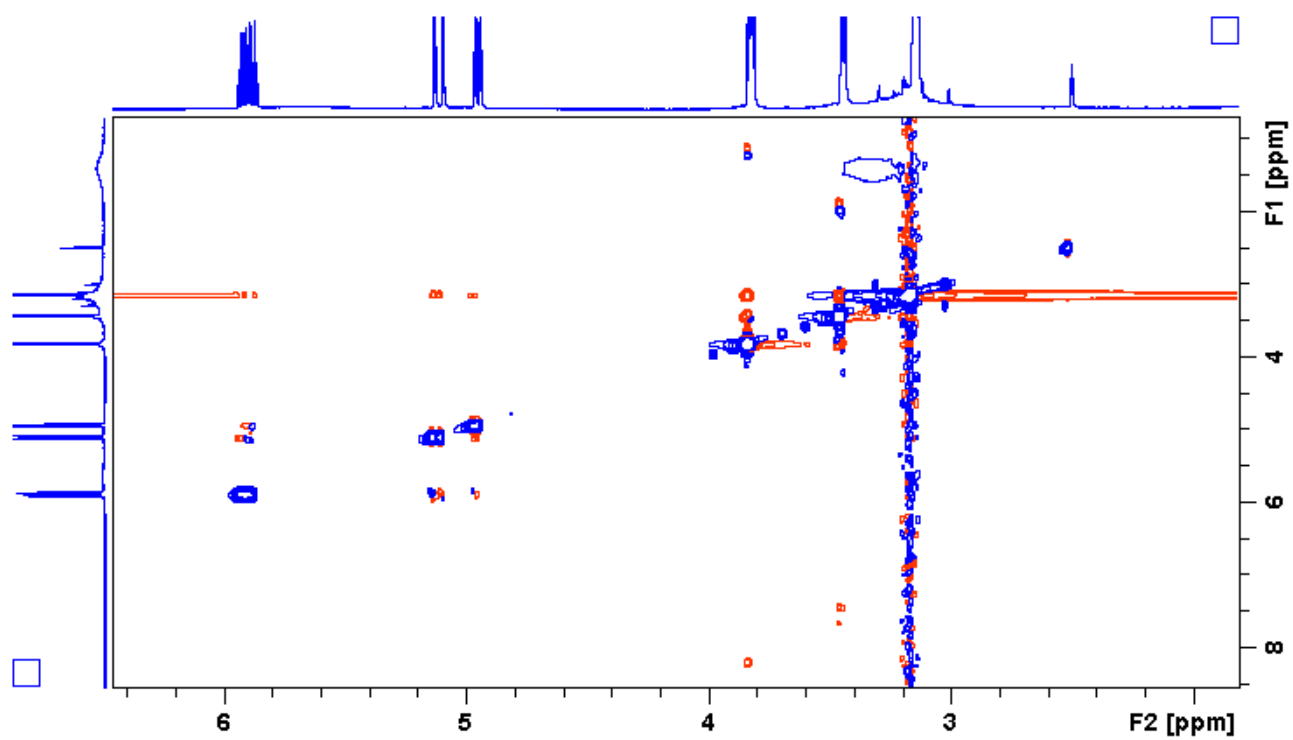

D8 = 500 ms

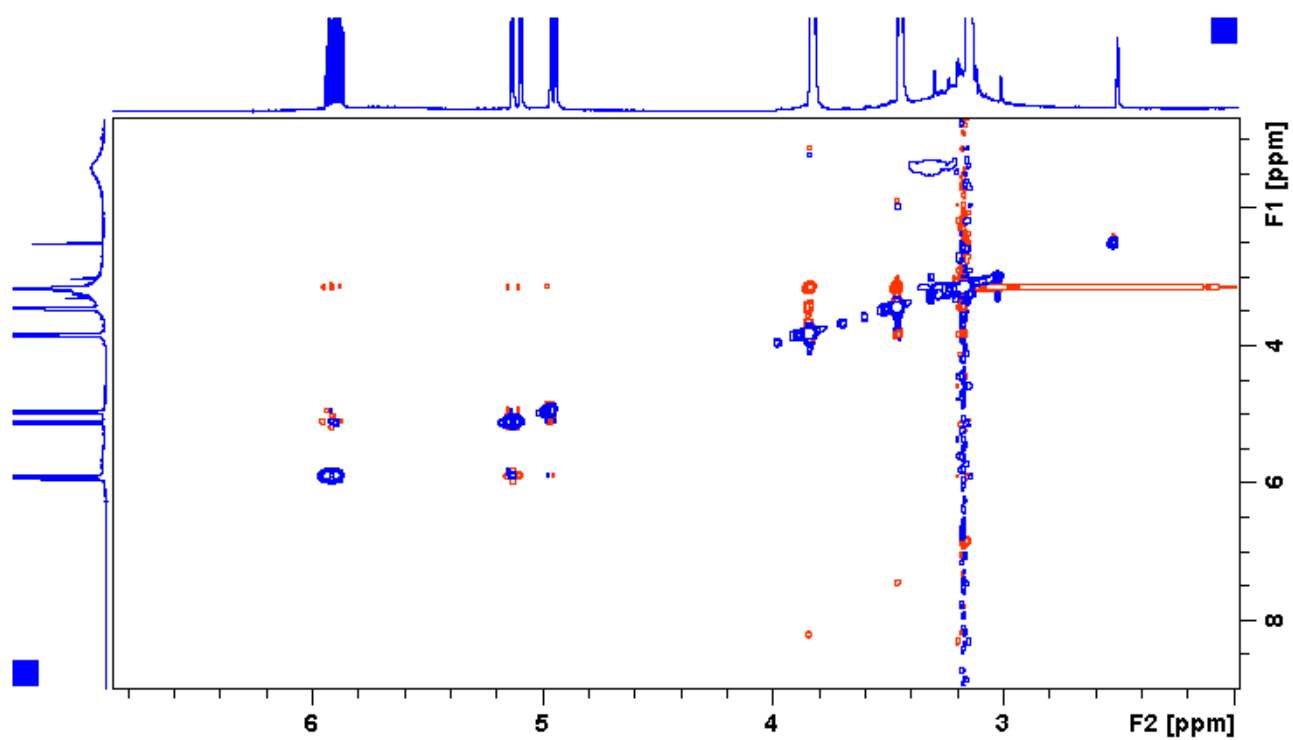

D8= 700 ms

**Figure S53.**  $^1\text{H}$ -NMR – DES<sub>13</sub>

campione sali di DES 13 in DMSO T= 305 K 3 Novembre 2022

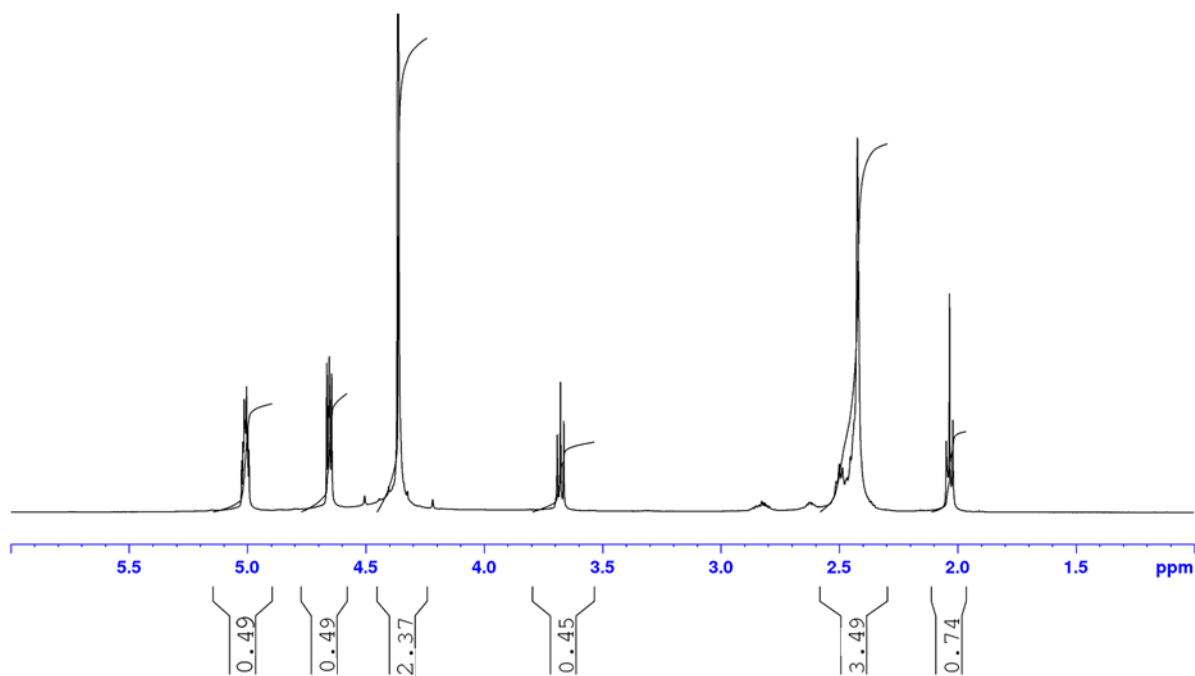

campione sali di DES 13 in DMSO T= 305 K 3 Novembre 2022

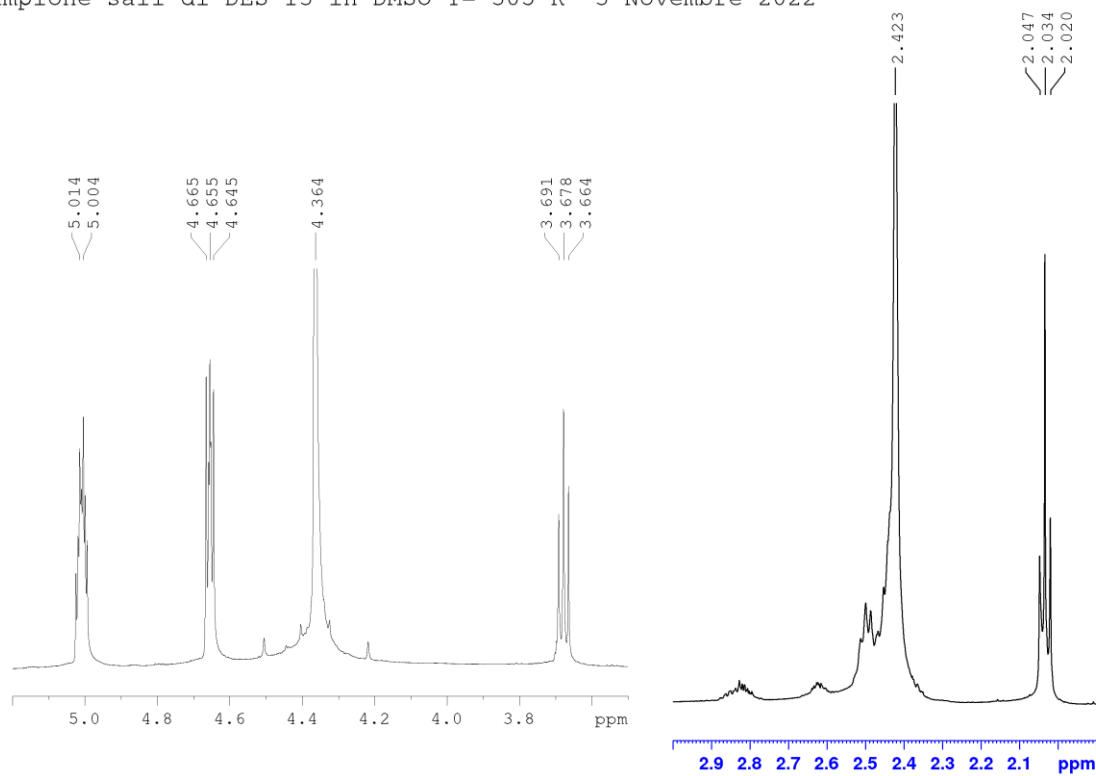



**Figure S54.**  $^{13}\text{C}$ -NMR- DES<sub>13</sub>

spettro  $^{13}\text{C}$  DES13 3 Novembre 2022  
T=305k

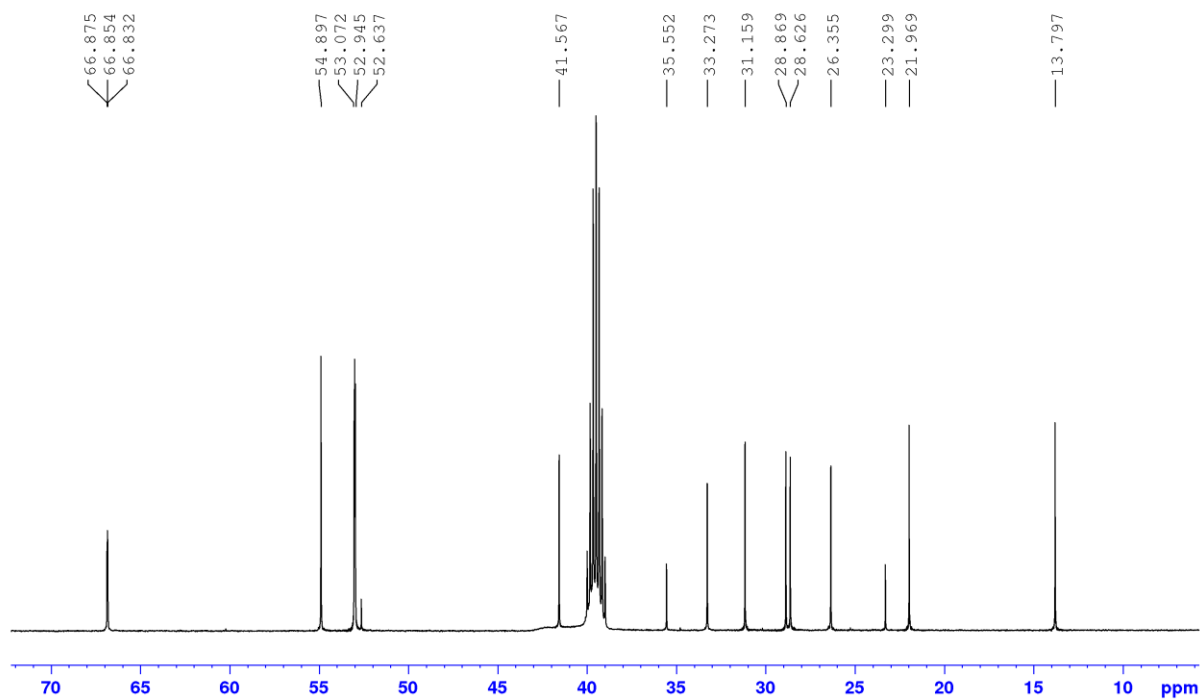

**Figure S55.** NOESY- DES<sub>13</sub>

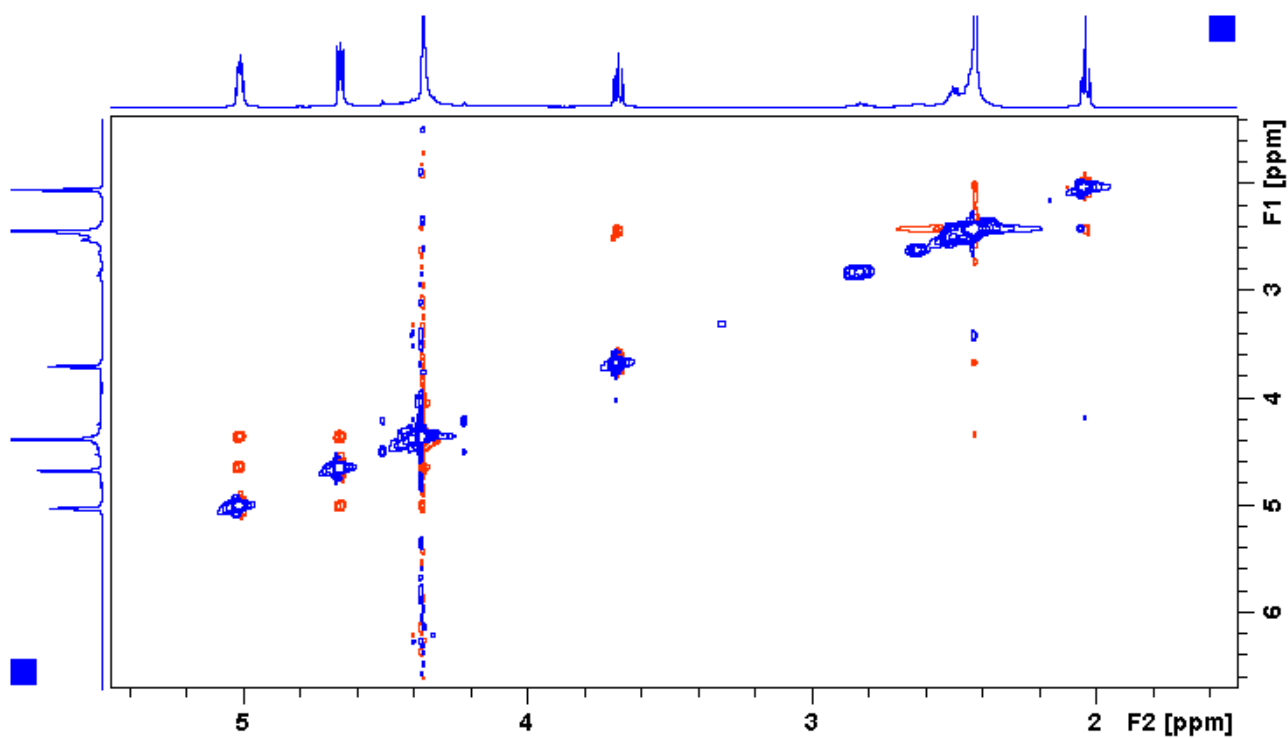

D8 =900 ms

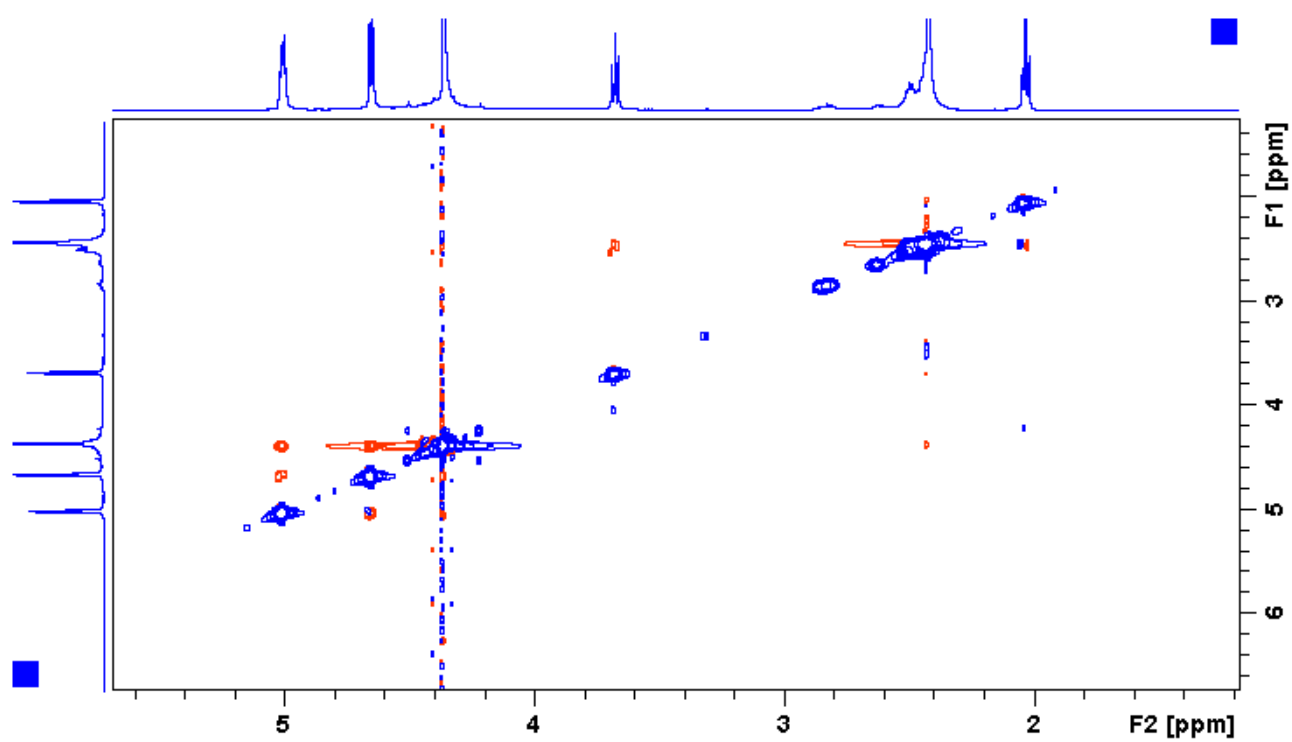

D8 = 500 ms

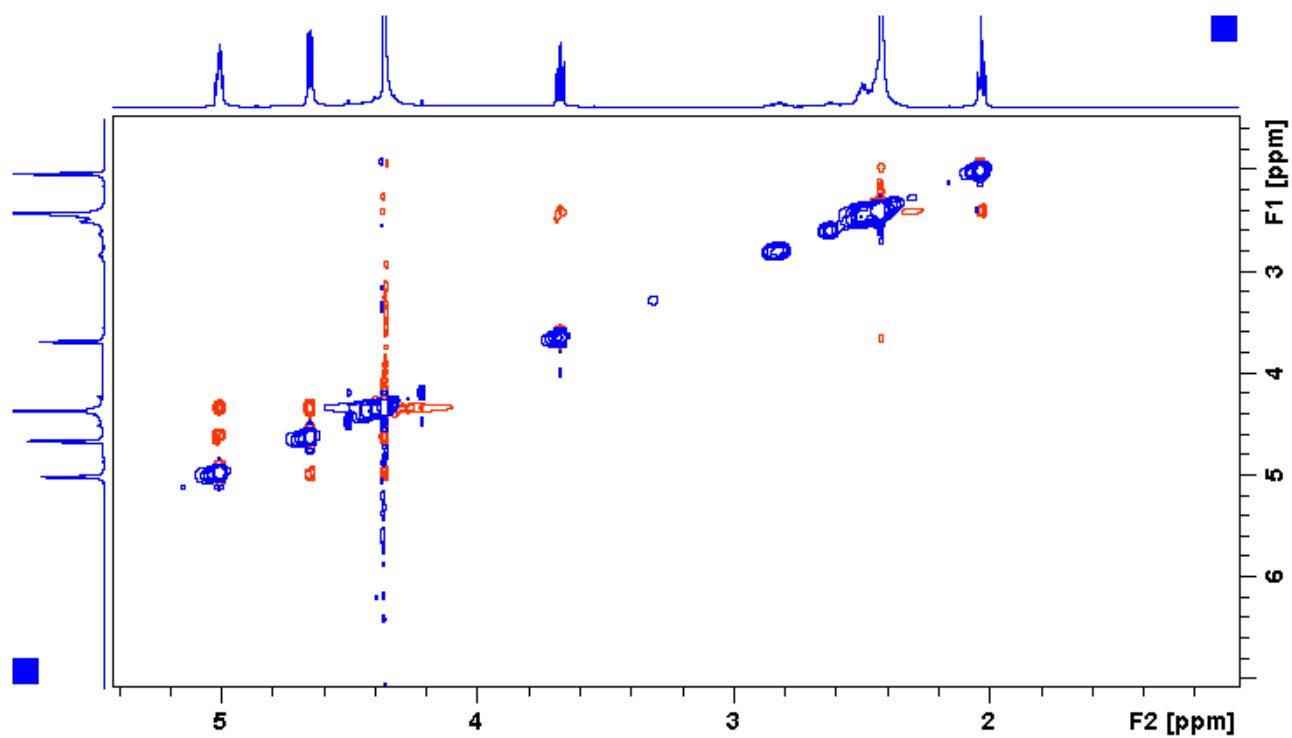

D8 = 700 ms

**Figure S56.**  $^1\text{H}$ -NMR – DES<sub>14</sub>

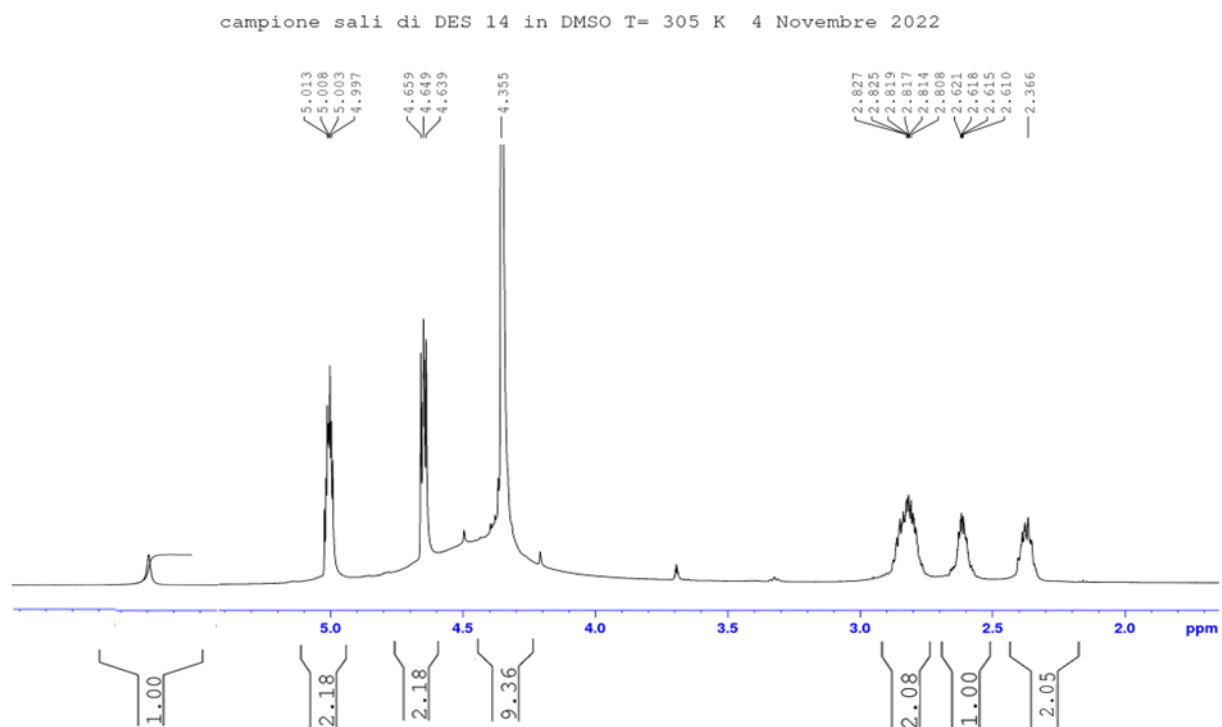

**Figure S57.**  $^{13}\text{C}$ -NMR- DES<sub>14</sub>

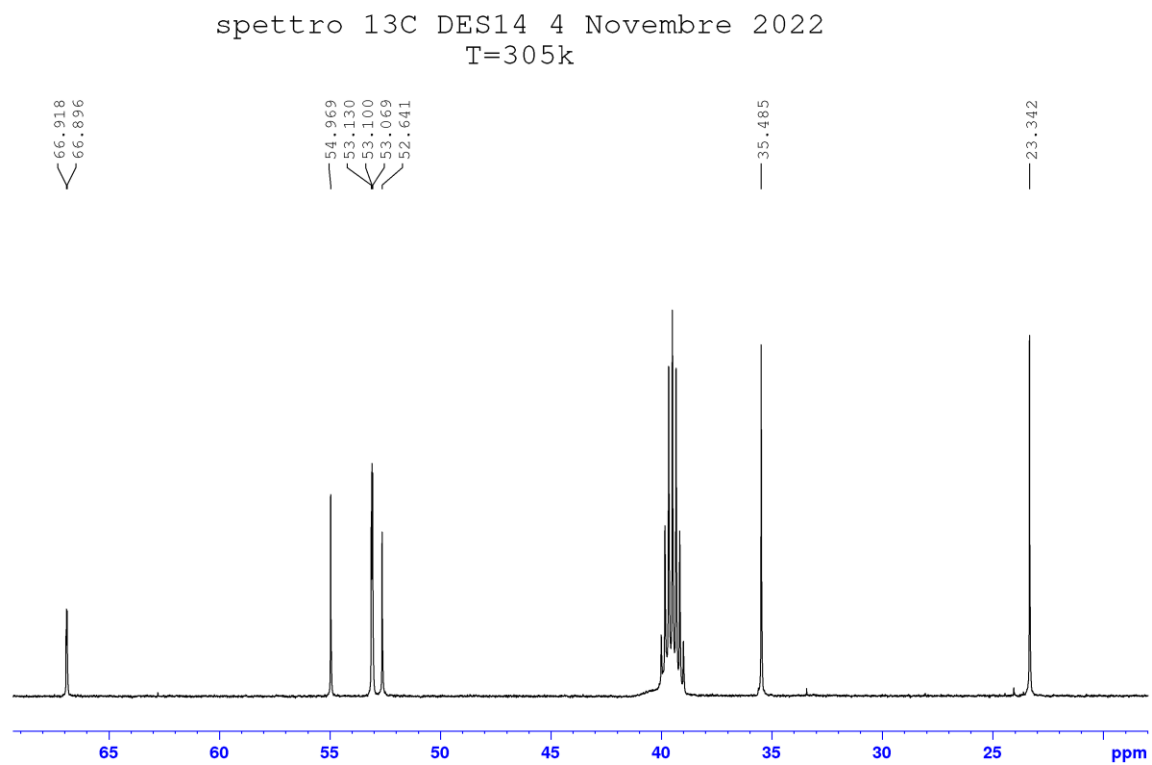

**Figure S58.** NOESY- DES<sub>14</sub>

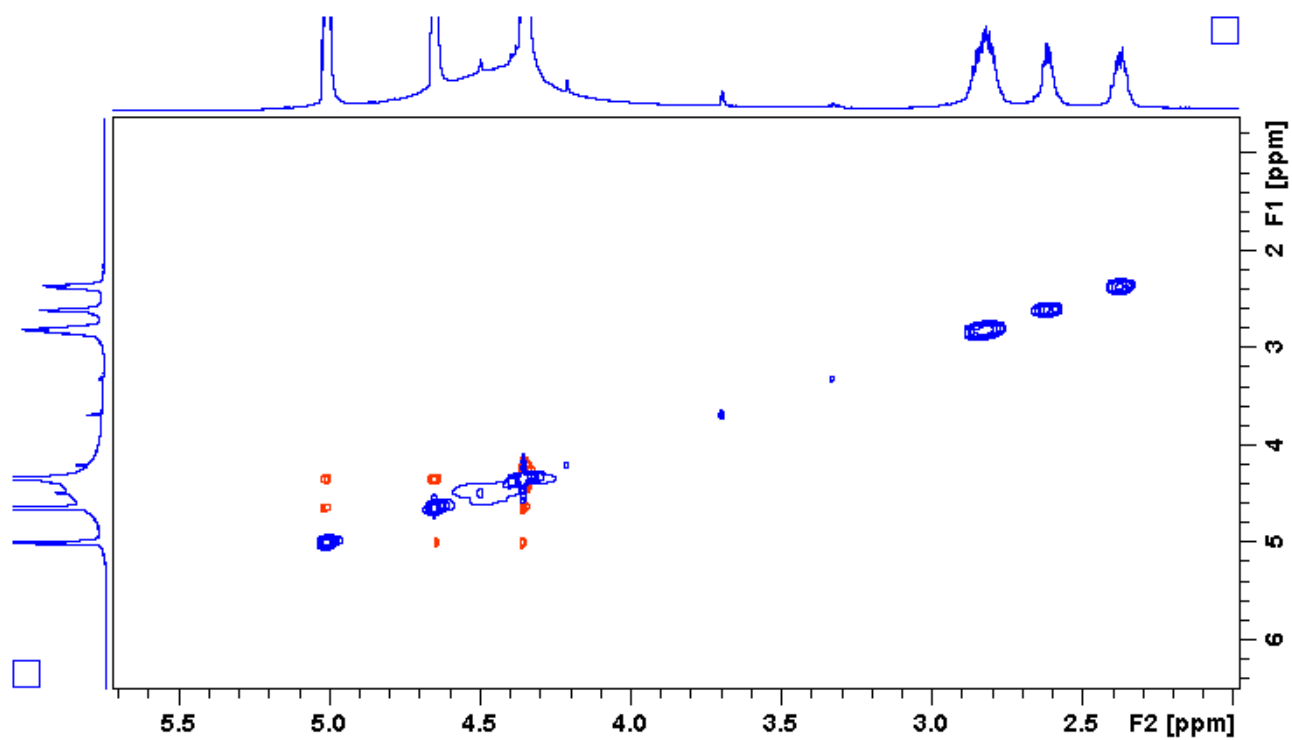

D8 = 900 ms

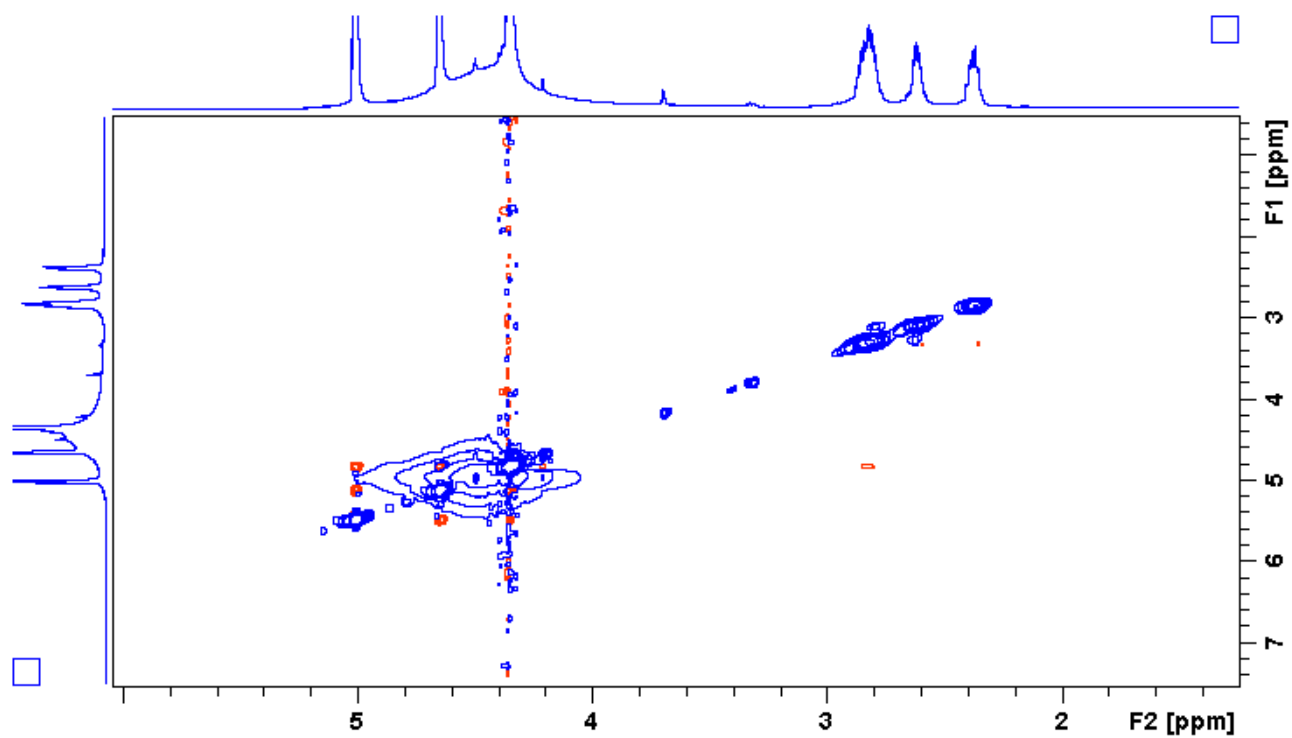

D8 = 500 ms

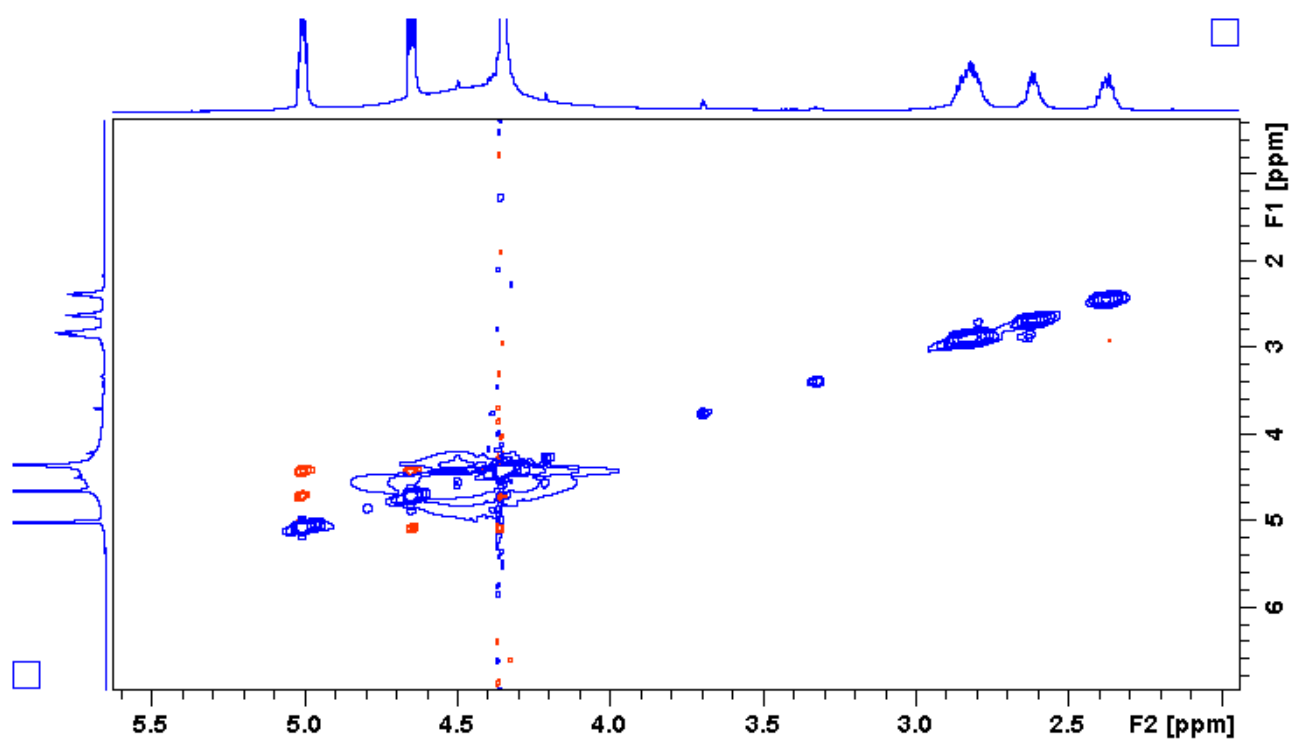

D8 = 700 ms

## Characterization data for products 1a-14d

***N*-(9-Fluorenylmethoxycarbonyl) aniline (1a):** Spectroscopic data reported in the literature.<sup>1</sup> Brown solid obtained in quantitative yield; (mp 191-192° C)

***N*-(*tert*-Butoxycarbonyl) aniline (1b):** Spectroscopic data compared to those of the pure product. White solid obtained in quantitative yield (mp 133-137° C)

***N*-Phenyl-*p*-toluenesulfonamide (1c):** Spectroscopic data compared to those of the pure product. White solid obtained in 85% yield (mp 101-103 °C).

***N*-Acetyl aniline (1d):** Spectroscopic data compared to those of the pure product. White solid obtained in 97% yield (mp 114-116 °C).

***N*-(9-Fluorenylmethoxycarbonyl) *p*-chloroaniline (2a):** <sup>1</sup>H NMR (300 MHz, CDCl<sub>3</sub>) δ =7.79 (d, 2H, J=7.5 Hz), 7.61 (d, 2H, J=7.3 Hz), 7.55-7.33 (m, 8H), 7.27 (m, 2H), 6.65 (br s, 1H), 4.55 (d, 2H, J=6.3 Hz), 4.24 (t, 1H, J=6.3Hz). <sup>13</sup>C NMR (CDCl<sub>3</sub>) δ = 47.0, 66.8 120.4, 125.0, 126.2, 127.1, 127.8, 129.0, 133.0, 136.5, 141.4, 143.6, 153.2. MSEI(+) m/z: 349 [M]<sup>+</sup>, 178 [9-methyl-9H-fluorene-H]<sup>+</sup>, 152.9 [C<sub>7</sub>H<sub>4</sub>CINO]<sup>+</sup>, 126 [C<sub>7</sub>H<sub>4</sub>CINH]<sup>+</sup>. Yellow solid obtained in quantitative yield (mp 162-163°C).

***N*-(*tert*-Butoxycarbonyl) *p*-chloroaniline (2b):** Spectroscopic data compared to those of the pure product. Yellow solid obtained in 97% yield (mp 102-103°C).

***N*-*p*-chloroaniline-*p*-toluenesulfonamide (2c):** Spectroscopic data compared to those of the pure product. Yellow solid obtained in 97% yield (mp 122-123°C).

***N*-*p*-chloroaniline-acetamide (2d):** Spectroscopic data compared to those of the pure product. Yellow solid obtained in 98% yield (mp 171-172°C).

***N*-(9-Fluorenylmethoxycarbonyl) toluidine (3a):** Spectroscopic data compared to those reported in the literature.<sup>1</sup> Colorless solid obtained in 94% yield (mp 195-197 °C).

***N*-(*tert*-Butoxycarbonyl)-toluidine (3b):** Spectroscopic data compared to those of the pure product. Colorless solid obtained in 95% yield (mp 86-88 °C).

***N*-Toluidine *p*-toluenesulfonamide (3c):** Spectroscopic data compared to those of the pure product. Colorless oil obtained in 89% yield.

***N*-toluidine-acetamide (3d):** Spectroscopic data compared to those of the pure product. White solid obtained in 96% yield (mp 152-153 °C).

***N*-(9-Fluorenylmethoxycarbonyl) anisidine (4a):** Spectroscopic data compared to those of the pure product. White solid obtained in 95% yield (mp 192-193 °C).

***N*-(*tert*-Butoxycarbonyl) anisidine (4b):** Spectroscopic data compared to those of the pure product. White solid obtained in 92% yield (mp 94-95° C).

***N*-anisidine *p*-toluenesulfonamide (4c):** Spectroscopic data compared to those reported in the literature.<sup>2</sup> Cream solid obtained in 90% yield (mp 115–116°C).

***N*-acetyl-anisidine (4d):** Spectroscopic data compared to those of the pure product. White solid obtained in 91% yield (mp 132-133 °C).

***N*-(9-Fluorenylmethoxycarbonyl) *p*-nitro-aniline (5a):** Spectroscopic data compared to those reported in the literature.<sup>3</sup> Yellow solid obtained in 92% yield (mp 181-183 °C).

***N*-(*tert*-Butoxycarbonyl) *p*-nitro-aniline (5b):** Spectroscopic data compared to those of the pure product. Yellow oil obtained in 93% yield.

***N*-*p*-nitro-aniline-*p*-toluenesulfonamide (5c):** Spectroscopic data compared to those reported in the literature.<sup>4</sup> White solid obtained in 91% yield (mp 181-183 °C).

***N-p-nitro-aniline acetamide (5d)***: Spectroscopic data compared to those of the pure product. Solid yellow obtained in 92% yield (mp 214-216 °C).

***N-(9-Fluorenylmethoxycarbonyl) m-nitro-aniline (6a)***: Spectroscopic data compared to those reported in the literature.<sup>4</sup> Yellow solid obtained in 79% yield. (mp 178-179 °C).

***N-(tert-Butoxycarbonyl) m-nitroaniline (6b)***: Spectroscopic data compared to those reported in the literature.<sup>5</sup> Yellow oil obtained in 75% yield.

***N-m-nitroaniline-p-toluenesulfonamide (6c)***: Spectroscopic data compared to those of the pure product. Yellow solid obtained in 78% yield (mp 125-127 °C).

***N-m-nitro-aniline acetamide (6d)***: Spectroscopic data compared to those of the pure product. Yellow solid obtained in 85% yield (mp 151-153 °C).

***N-(9-Fluorenylmethoxycarbonyl) -o-phenylenediamine (7a)***: <sup>1</sup>H-NMR (300 MHz, CDCl<sub>3</sub>): δ = 4.27 (t, 1H, J = 7.2 Hz, CH), 4.47 (d, 2H, J = 7.2 Hz, CH<sub>2</sub>), 7.41-7.28 (m, 5H, ArH e NH), 7.57 (d, J = 7.4 Hz, 2H, ArH), 7.68-7.66 (m, 2H, ArH), 7.91-7.85 (m, 4H, ArH), 8.98 (s, 2H, NH) ppm. <sup>13</sup>C-NMR (75 MHz, CDCl<sub>3</sub>): δ = 47.2, 67.2, 114.6, 118.8, 120.1, 122.7, 124.9, 125.2, 125.5, 127.0, 127.8, 141., 143.8, 150.1, 153.4. MSEI(+) m/z: 330 [M]<sup>+</sup>, 178 [9-methyl-9H-fluorene-H]<sup>+</sup>, 135 [C<sub>7</sub>H<sub>7</sub>N<sub>2</sub>O]<sup>+</sup>, 107 [C<sub>7</sub>H<sub>4</sub>N<sub>2</sub>H<sub>2</sub>]<sup>+</sup>. White solid obtained in 79% yield. (mp 180-182 °C).

***N-( tert-Butoxycarbonyl) -o-phenylenediamine (7b)***: Spectroscopic data compared to those of the pure product. Brown solid obtained in 80% yield (mp 110-114 °C).

***N-p-toluenesulfonamide-o-phenylenediamine (7c)***: Spectroscopic data compared to those of the pure product. White solid obtained in 78% yield (mp 111-113 °C).

***o-amino Acetanilide (7d)***: Spectroscopic data compared to those of the pure product. White solid obtained in 81% yield (mp 111-113 °C).

***N-(9-Fluorenylmethoxycarbonyl)-o-aminophenol (8a)***: Spectroscopic data compared to those reported in the literature.<sup>5</sup>

Yellow solid obtained in 88% yield (mp 167-169 °C).

***N-(tert-Butoxycarbonyl)-o-amminophenol (8b)***: Spectroscopic data compared to those of the pure product. Yellow solid obtained in 87% yield (mp 143-147 °C).

***N-p-toluenesulfonamide-o-aminophenol (8c)***: Spectroscopic data compared to those of the pure product. Dark pink solid obtained in 91% yield (mp 102-103 °C).

***o-hydroxy Acetanilide (8d)***: Spectroscopic data compared to those of the pure product. Bright brown solid obtained in 92% yield (mp 207-210 °C).

***N-(9-Fluorenylmethoxycarbonyl) benzylamine (9a)***: Spectroscopic data compared to those reported in the literature.<sup>1</sup> Colorless solid obtained in 90% yield (mp 192-193 °C).

***N-(tert-Butoxycarbonyl) benzylamine (9b)***: Spectroscopic data compared to those of the pure product. White solid obtained in 90% yield (mp 55-57 °C).

***N-Benzyl-p-toluenesulfonamide (9c)***: Spectroscopic data compared to those of the pure product. Yellow solid obtained in 88% yield (mp 115-116 °C).

***N-benzylacetamide (9d)***: Spectroscopic data compared to those of the pure product. Yellow solid obtained in 90% yield (mp 60-62 °C).

***N-(9-Fluorenylmethoxycarbonyl) p-methoxybenzylamine (10a)***: Spectroscopic data compared to those reported in the literature.<sup>2</sup> White solid obtained in 95% in yield. (mp. 182-184 °C).

***N-(tert-Butoxycarbonyl) p-methoxybenzylamine (10b)***: Spectroscopic data compared to those reported in the literature.<sup>2</sup> Colourless oil 94% yield.

***N-p-toluenesulfonamide- p-methoxybenzylamine (10c)***: Spectroscopic data compared to those reported in the literature.<sup>2</sup> White solid obtained in 92% yield (mp 180-182 °C).

***p-Methoxybenzyl acetamide (10d)***: Spectroscopic data compared to those of the pure product. Yellow oil obtained in 96% yield.

***N-(9-Fluorenylmethoxycarbonyl) ethanolamine (11a)***: Spectroscopic data compared to those of the pure product. Colorless solid obtained in 92% yield (mp 145-147 °C).

***N-(tert-Butoxycarbonyl) ethanolamine (11b)***: Spectroscopic data compared to those of the pure product. Colourless oil obtained in 94% yield.

***N- p-toluenesulfonamide- ethanolamine (11c)***: Spectroscopic data compared to those of the pure product. Dark brown solid obtained in the 94% yield (mp 55-57 °C).

***N-acetyl-ethanolamine (11d)***: Spectroscopic data compared to those of the pure product. Colourless oil obtained in 94% yield.

***N-(9-Fluorenylmethoxycarbonyl)-allylamine (12a)***: Spectroscopic data compared to those of the pure product. Pale yellow solid obtained in 93% yield.

***N-(tert-Butoxycarbonyl)-allylamine (12b)***: Spectroscopic data compared to those of the pure product. White solid obtained in 95% yield (mp 35-38 °C).

***N- p-toluenesulfonamide-allylamine (12c)***: Spectroscopic data compared to those of the pure product. Dark brown solid obtained in the 96% yield (mp 55-57 °C).

***N-acetyl- allylamine (12d)***: Spectroscopic data compared to those of the pure product. Brown solid obtained in 94% yield (mp 64-65 °C).

***N-(9-Fluorenylmethoxycarbonyl) octylamine (13a)***: Spectroscopic data compared to those reported in the literature.<sup>3</sup> Pale yellow solid obtained in 86% yield (mp 91-93 °C).

***N-(tert-Butoxycarbonyl) octylamine (13b)***: Spectroscopic data compared to those reported in the literature.<sup>3</sup> Colourless oil obtained in 85% yield.

***N-Octyl p-toluenesulfonamide (13c)***: Spectroscopic data compared to those reported in the literature.<sup>3</sup> Yellow oil obtained in 80% yield.

***N-Octyl acetamide (13d)***: Spectroscopic data compared to those of the pure product. Colorless oil obtained in 86% yield.

***N-(9-Fluorenylmethoxycarbonyl)-cyclopentylamine (14a)***: Spectroscopic data compared to those reported in the literature.<sup>6</sup> Pale yellow solid obtained in 86% yield (mp 111-113 °C).

***N-(tert-Butoxycarbonyl)-cyclopentylamine (14b)***: Spectroscopic data compared to those of the pure product. Pale yellow solid obtained in 86% yield (mp 74-76 °C).

***N- p-toluenesulfonamide cyclopentylamine (14c)***: Spectroscopic data compared to those of the pure product. Pale yellow solid obtained in 78% yield (mp 89-91 °C).

***N-cyclopentylacetamide (14d)***: Spectroscopic data compared to those of the pure product. Pale yellow solid obtained in 83% yield (mp 78-81 °C).



## References

- 1 M. B. Gawande, P. S. Branco *Green Chem.*, 2011, **13**, 3355 -3359.
- 2 M. A. K. Zarchi, M. Aslani, *J. Appl. Polym. Sci*, 2012, **124**, 3456-3462.
- 3 M. Nardi, N. Herrera Cano, P. Costanzo, M. Oliverio, G. Sindona, A. Procopio, *RSC Adv.*, 2015, **5**, 18751-18760.
- 4 M. Nasrollahzadeh, A. Ehsani, A. Rostami-Vartouni, *Ultrason Sonochem*, 2014, **21**, 275-282.
- 5 D. Procopio, C. Siciliano, R. De Rose, S. Trombino, R. Cassano, M.L. Di Gioia *Catalysts*. 2022; **12**(11):1480.
- 6 M. Godoi, G. V. Botteselle, J. Rafique, M. S. T. Rocha, J. M. Pena, A. L. Braga *Asian J. Org. Chem.*, 2013, **2** (9), 746-749.

**Figure S59.**  $^1\text{H}$ -NMR (**2a**).

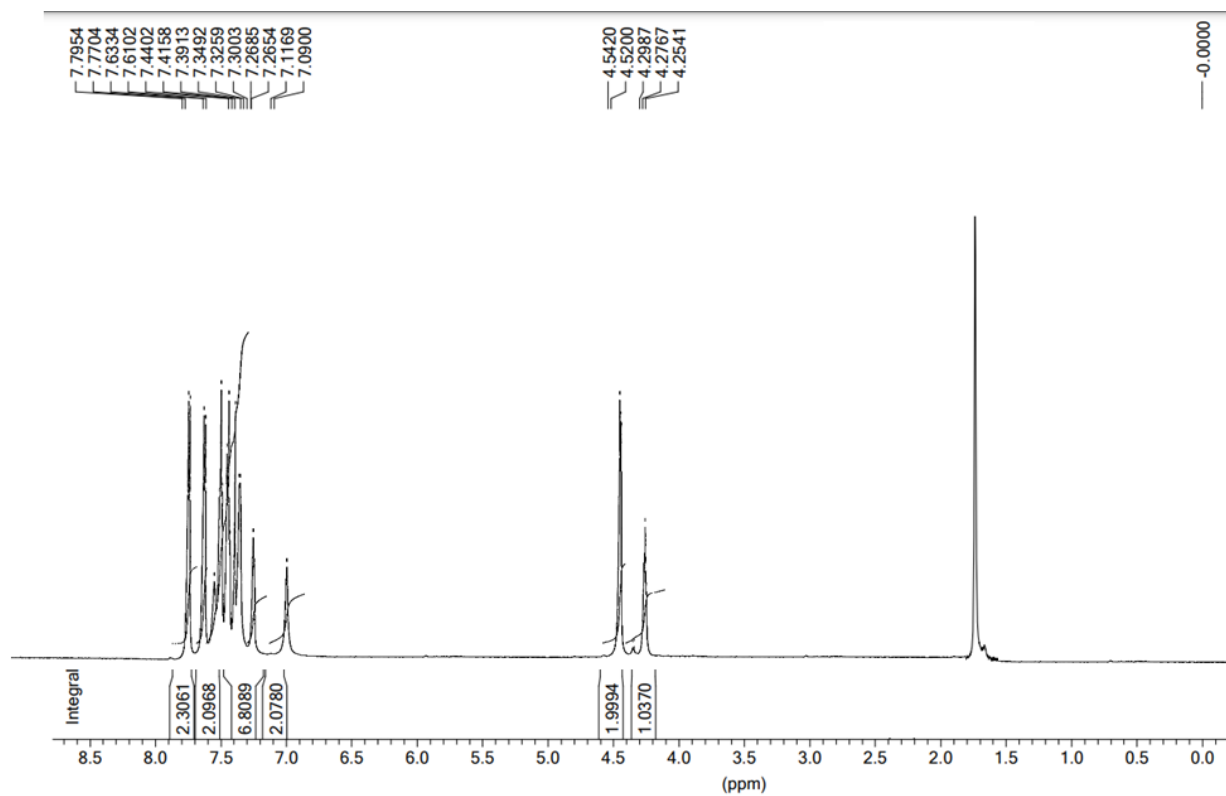

**Figure S60.**  $^{13}\text{C}$ -NMR (**2a**).

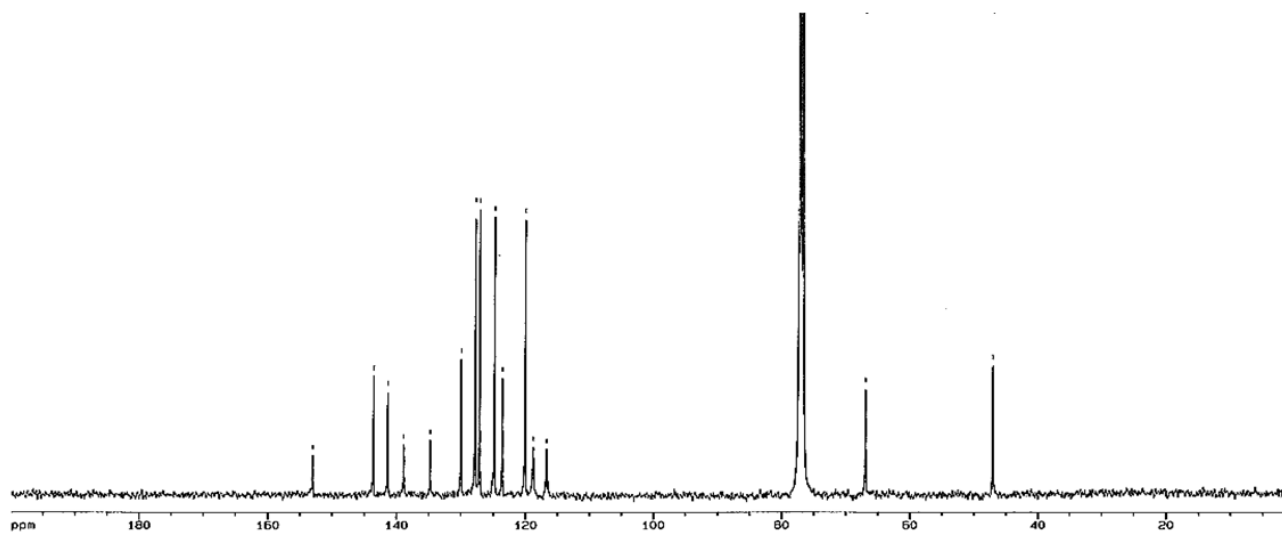

**Figure S61.** MSEI (+) (2a).

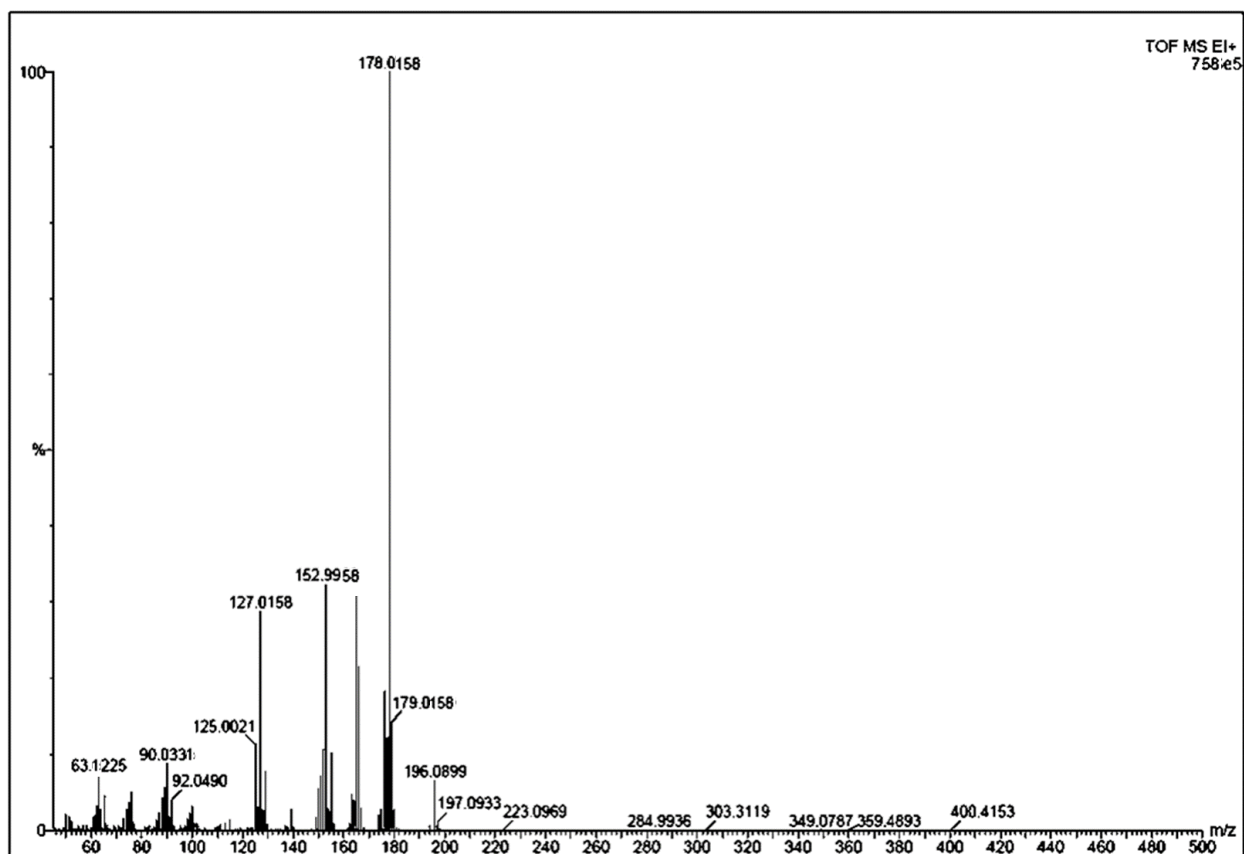

**Figure S62.**  $^1\text{H}$ -NMR (7a)

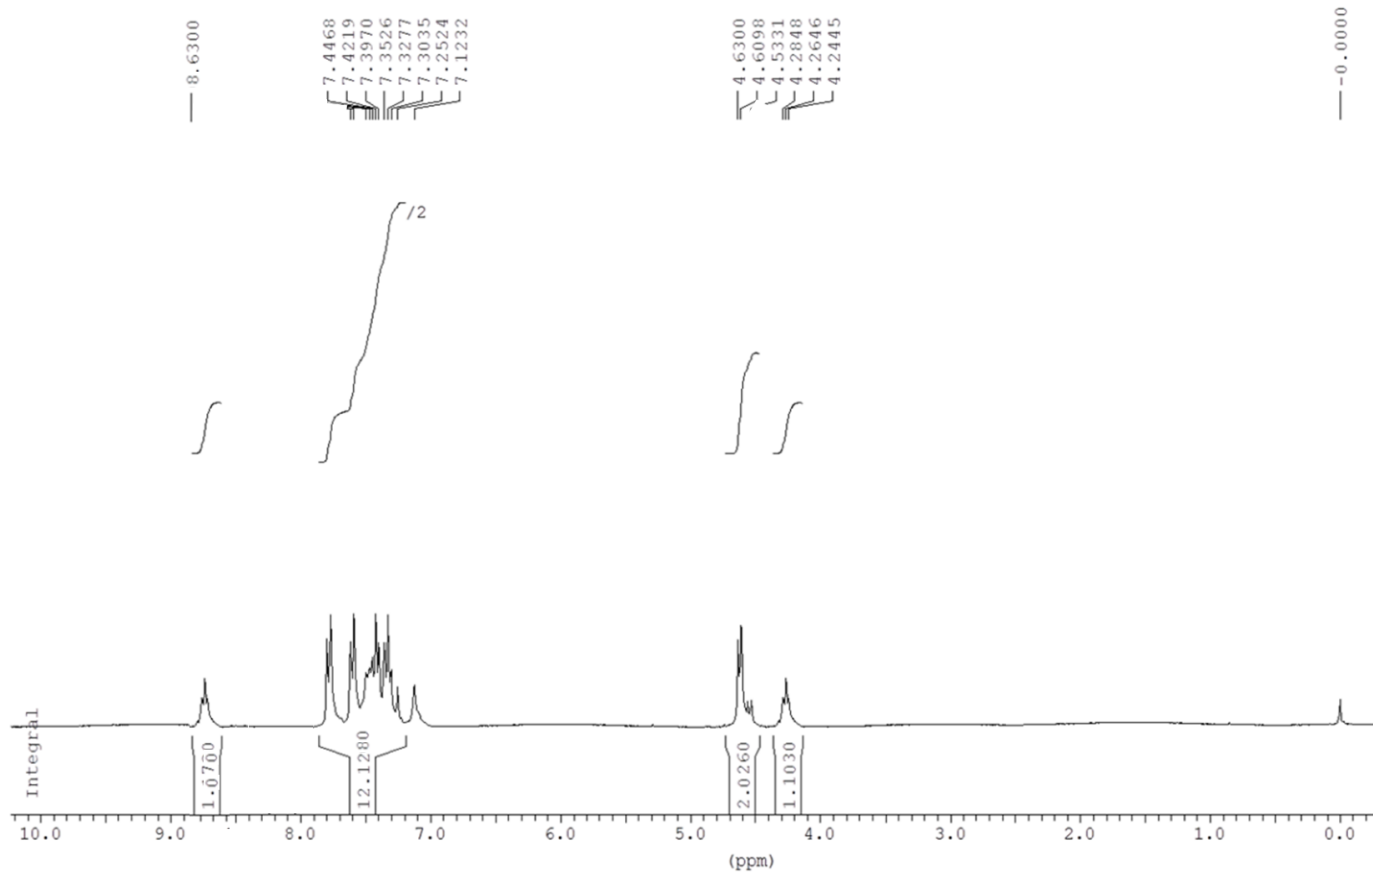

**Figure S63.**  $^{13}\text{C}$ -NMR(7a).

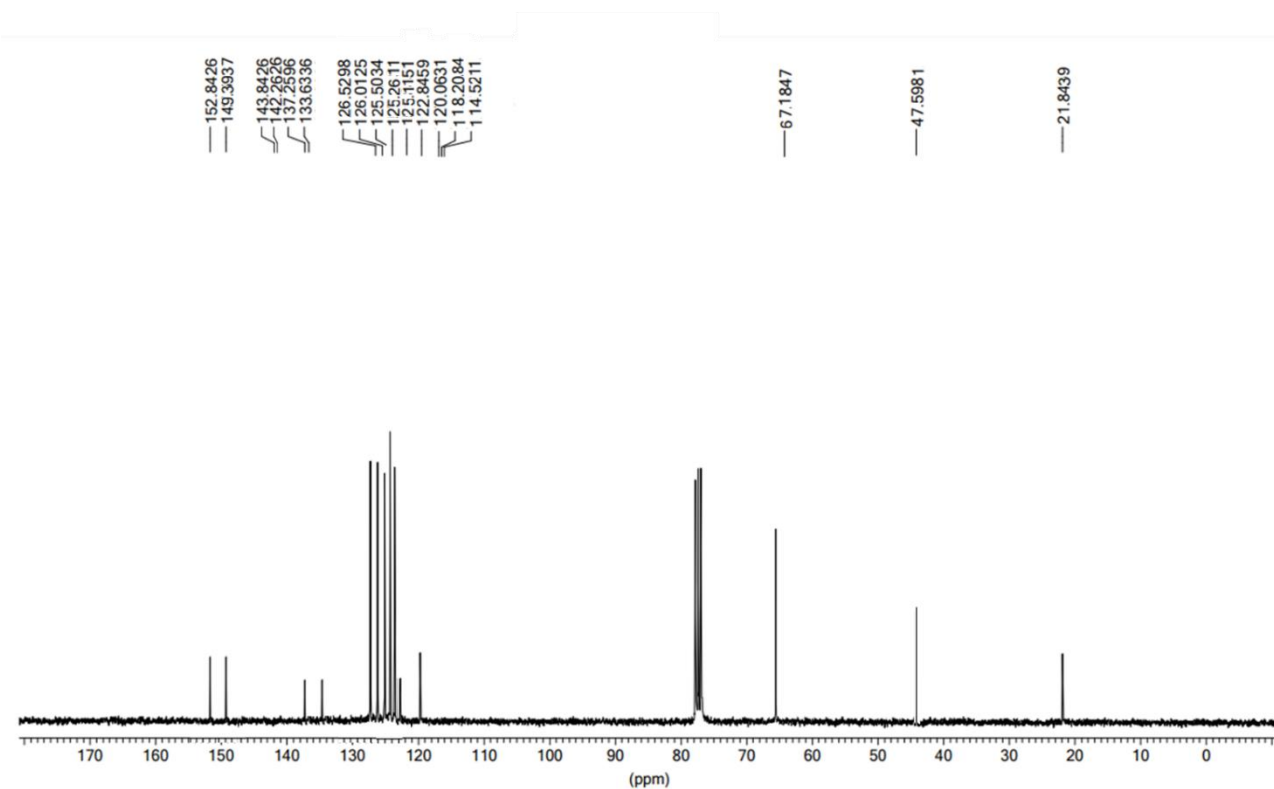

**Figure S64.** MSEI (+) (**7a**)

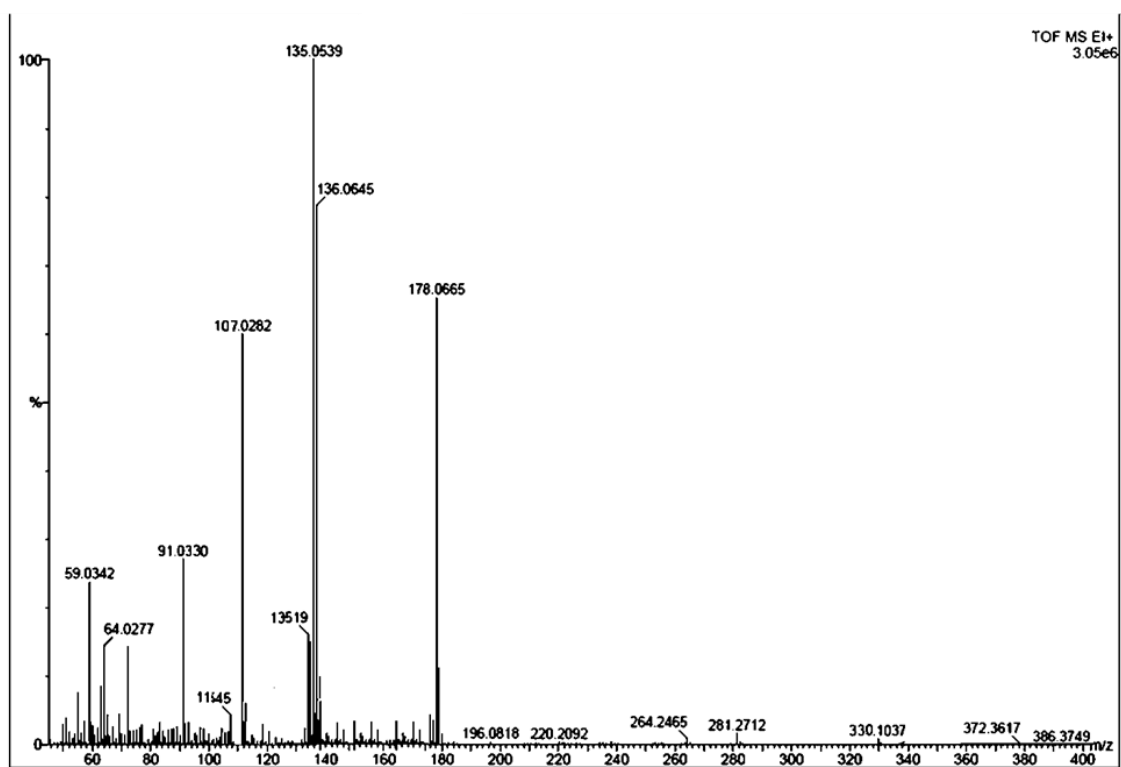

Supplement: d3gc00118k1.pdf [file d3gc00118k1.pdf]
